# Supplementary material for: Efficient syntheses of substituted (±)-3-oxoisoindoline-1-carbonitriles and carboxamides using OSU-6
Source: Royal Society of Chemistry journal article supplement (doi:10.1039/c4gc02486a), 2015-01-01

## Efficient syntheses of substituted ( $\pm$ )-3-oxoisindoline-1-carbonitriles and carboxamides using OSU-6

Baskar Nammalwar, Nagendra Prasad Muddala, Maeghan Murie and Richard A. Bunce\*

Department of Chemistry, Oklahoma State University, Stillwater, OK 74078-3071, USA

### Supporting Information

#### Table of Contents

|                                                                              |     |
|------------------------------------------------------------------------------|-----|
| $^1\text{H}$ - and $^{13}\text{C}$ -NMR spectra for compound <b>3a</b> ..... | S3  |
| $^1\text{H}$ - and $^{13}\text{C}$ -NMR spectra for compound <b>3b</b> ..... | S4  |
| $^1\text{H}$ - and $^{13}\text{C}$ -NMR spectra for compound <b>3c</b> ..... | S5  |
| $^1\text{H}$ - and $^{13}\text{C}$ -NMR spectra for compound <b>3d</b> ..... | S6  |
| $^1\text{H}$ - and $^{13}\text{C}$ -NMR spectra for compound <b>3e</b> ..... | S7  |
| $^1\text{H}$ - and $^{13}\text{C}$ -NMR spectra for compound <b>3f</b> ..... | S8  |
| $^1\text{H}$ - and $^{13}\text{C}$ -NMR spectra for compound <b>3g</b> ..... | S9  |
| $^1\text{H}$ - and $^{13}\text{C}$ -NMR spectra for compound <b>3h</b> ..... | S10 |
| $^1\text{H}$ - and $^{13}\text{C}$ -NMR spectra for compound <b>3i</b> ..... | S11 |
| $^1\text{H}$ - and $^{13}\text{C}$ -NMR spectra for compound <b>3j</b> ..... | S12 |
| $^1\text{H}$ - and $^{13}\text{C}$ -NMR spectra for compound <b>4a</b> ..... | S13 |
| $^1\text{H}$ - and $^{13}\text{C}$ -NMR spectra for compound <b>4b</b> ..... | S14 |
| $^1\text{H}$ - and $^{13}\text{C}$ -NMR spectra for compound <b>4c</b> ..... | S15 |
| $^1\text{H}$ - and $^{13}\text{C}$ -NMR spectra for compound <b>4d</b> ..... | S16 |
| $^1\text{H}$ - and $^{13}\text{C}$ -NMR spectra for compound <b>4e</b> ..... | S17 |
| $^1\text{H}$ - and $^{13}\text{C}$ -NMR spectra for compound <b>4f</b> ..... | S18 |
| $^1\text{H}$ - and $^{13}\text{C}$ -NMR spectra for compound <b>4g</b> ..... | S19 |
| $^1\text{H}$ - and $^{13}\text{C}$ -NMR spectra for compound <b>4h</b> ..... | S20 |
| $^1\text{H}$ - and $^{13}\text{C}$ -NMR spectra for compound <b>6a</b> ..... | S21 |
| $^1\text{H}$ - and $^{13}\text{C}$ -NMR spectra for compound <b>6b</b> ..... | S22 |
| $^1\text{H}$ - and $^{13}\text{C}$ -NMR spectra for compound <b>6c</b> ..... | S23 |

|                                                                              |     |
|------------------------------------------------------------------------------|-----|
| <sup>1</sup> H- and <sup>13</sup> C-NMR spectra for compound <b>6d</b> ..... | S24 |
| <sup>1</sup> H- and <sup>13</sup> C-NMR spectra for compound <b>6e</b> ..... | S25 |
| <sup>1</sup> H- and <sup>13</sup> C-NMR spectra for compound <b>8a</b> ..... | S26 |
| <sup>1</sup> H- and <sup>13</sup> C-NMR spectra for compound <b>8b</b> ..... | S27 |
| <sup>1</sup> H- and <sup>13</sup> C-NMR spectra for compound <b>8c</b> ..... | S28 |
| <sup>1</sup> H- and <sup>13</sup> C-NMR spectra for compound <b>8d</b> ..... | S29 |
| <sup>1</sup> H- and <sup>13</sup> C-NMR spectra for compound <b>8e</b> ..... | S30 |
| <sup>1</sup> H- and <sup>13</sup> C-NMR spectra for compound <b>8f</b> ..... | S31 |
| <sup>1</sup> H- and <sup>13</sup> C-NMR spectra for compound <b>9a</b> ..... | S32 |
| <sup>1</sup> H- and <sup>13</sup> C-NMR spectra for compound <b>9b</b> ..... | S33 |
| <sup>1</sup> H- and <sup>13</sup> C-NMR spectra for compound <b>9c</b> ..... | S34 |
| <sup>1</sup> H- and <sup>13</sup> C-NMR spectra for compound <b>9d</b> ..... | S35 |
| <sup>1</sup> H- and <sup>13</sup> C-NMR spectra for compound <b>9e</b> ..... | S36 |
| <sup>1</sup> H- and <sup>13</sup> C-NMR spectra for compound <b>9f</b> ..... | S37 |
| <sup>1</sup> H- and <sup>13</sup> C-NMR spectra for compound <b>9g</b> ..... | S38 |
| <sup>1</sup> H- and <sup>13</sup> C-NMR spectra for compound <b>9h</b> ..... | S39 |
| <sup>1</sup> H- and <sup>13</sup> C-NMR spectra for compound <b>9i</b> ..... | S40 |
| <sup>1</sup> H- and <sup>13</sup> C-NMR spectra for compound <b>9j</b> ..... | S41 |
| <sup>1</sup> H- and <sup>13</sup> C-NMR spectra for compound <b>9k</b> ..... | S42 |
| <sup>1</sup> H- and <sup>13</sup> C-NMR spectra for compound <b>9l</b> ..... | S43 |
| <sup>1</sup> H- and <sup>13</sup> C-NMR spectra for compound <b>9m</b> ..... | S44 |
| <sup>1</sup> H- and <sup>13</sup> C-NMR spectra for compound <b>9n</b> ..... | S45 |

# (±)-2-Benzyl-3-oxoisindoline-1-carbonitrile (3a)

BN-XIII-075-1H.10.fid  
PROTON CDCl3 (C:\NMRDATA) baskar 10

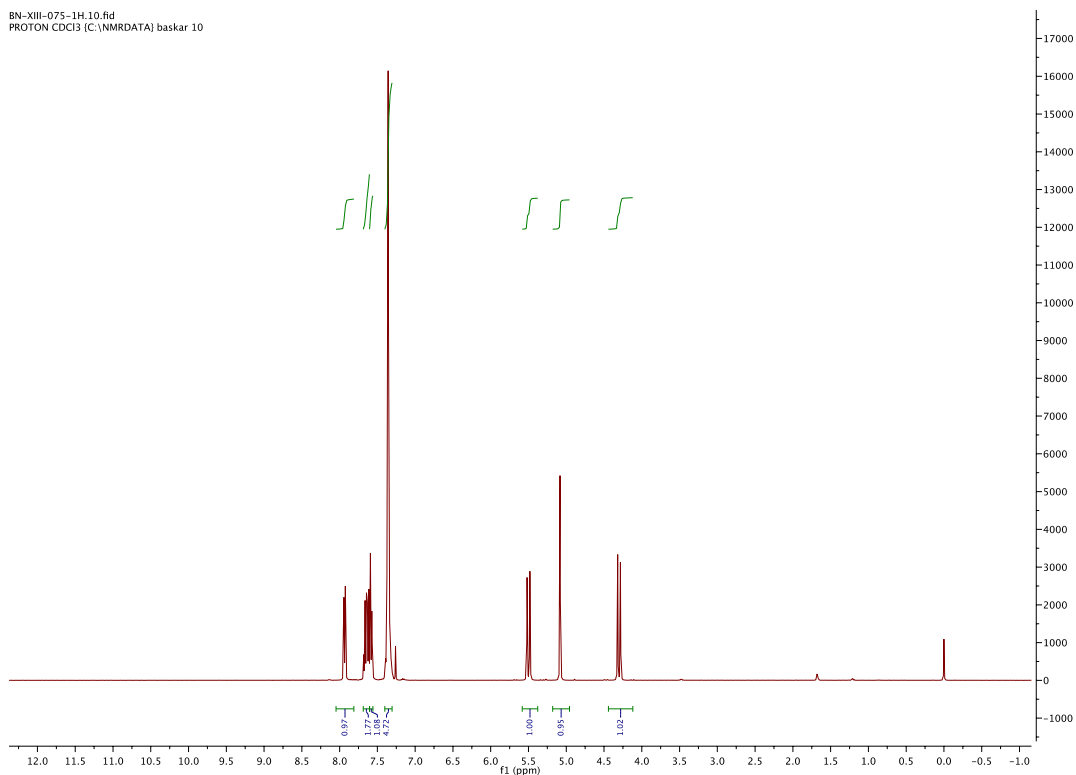

BN-XIII-075-13C.10.fid  
C13CPD CDCl3 (C:\NMRDATA) baskar 10

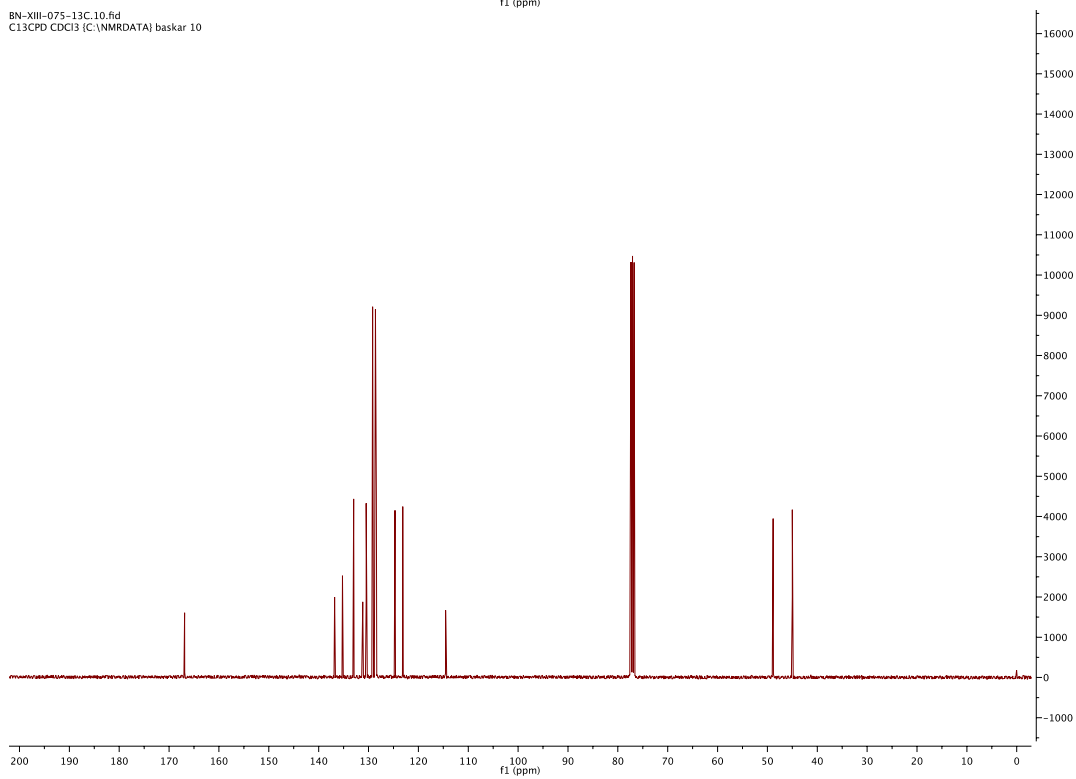

# (±)-2-(4-Chlorobenzyl)-3-oxoisindoline-1-carbonitrile (3b)

BN-XIII-076-1H.10.fid  
PROTON DMSO (C:\NMRDATA) baskar 14

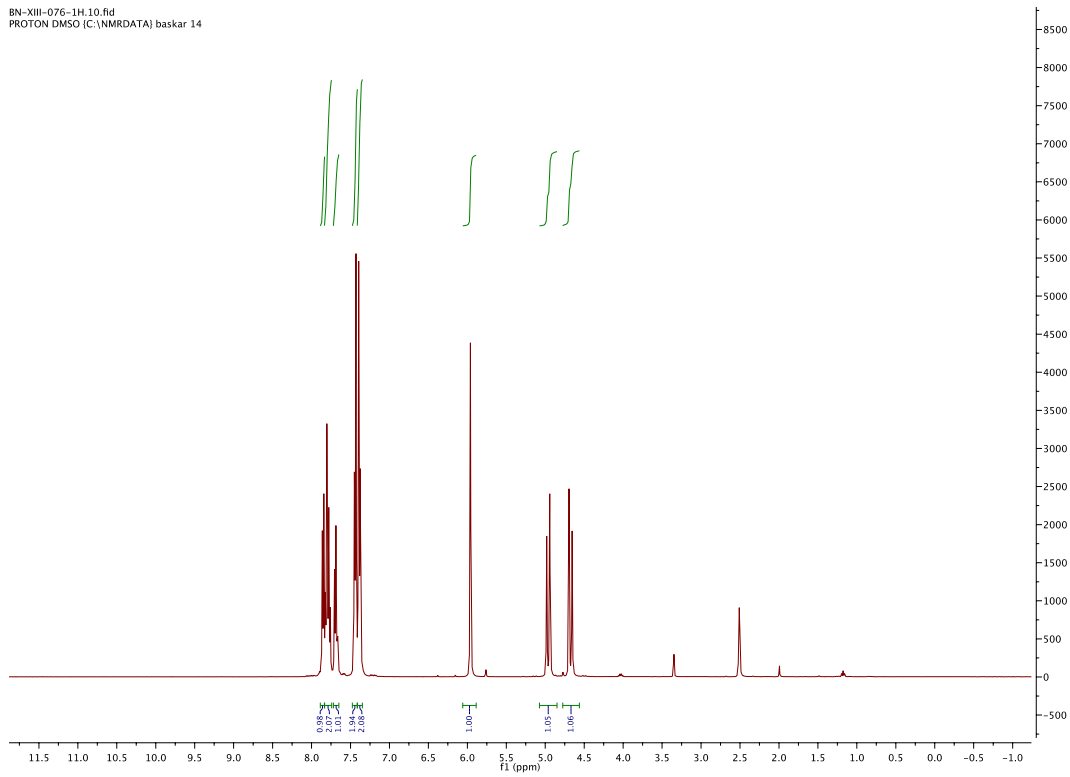

BN-XIII-076-13C.10.fid  
C13CPD DMSO (C:\NMRDATA) baskar 14

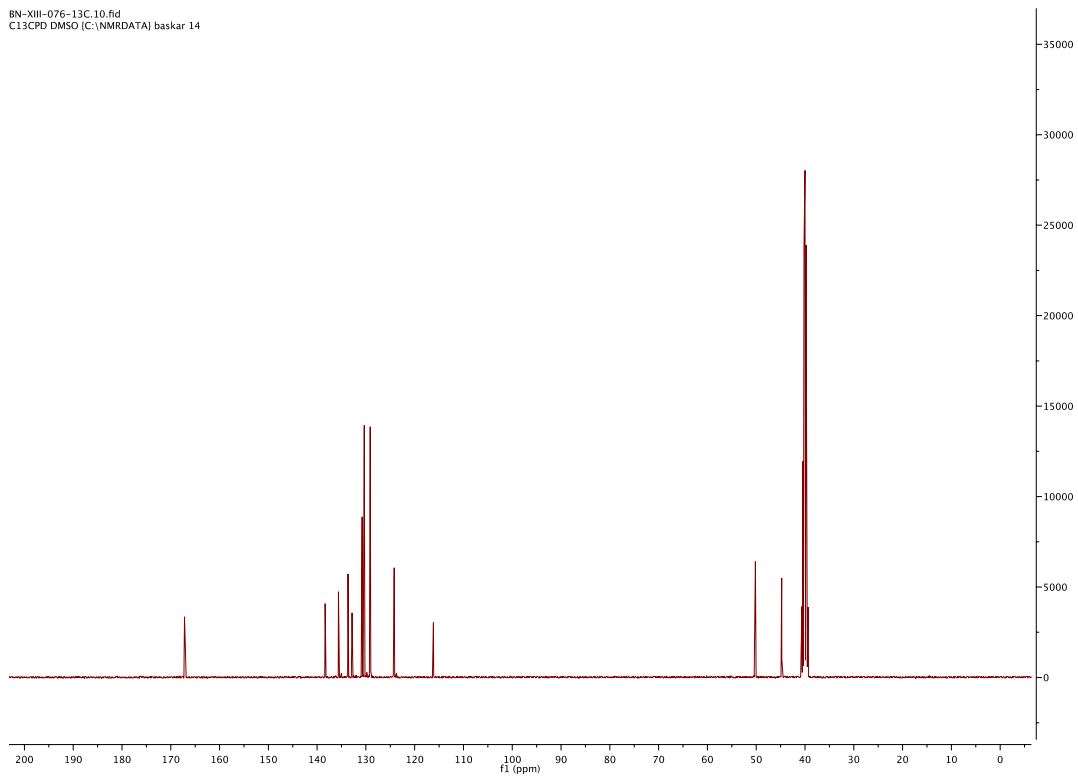

# (±)-2-(4-Fluorobenzyl)-3-oxoisindoline-1-carbonitrile (3c)

BN-XIII-074-1H.10.fid  
PROTON DMSO (C:\NMRDATA) baskar 12

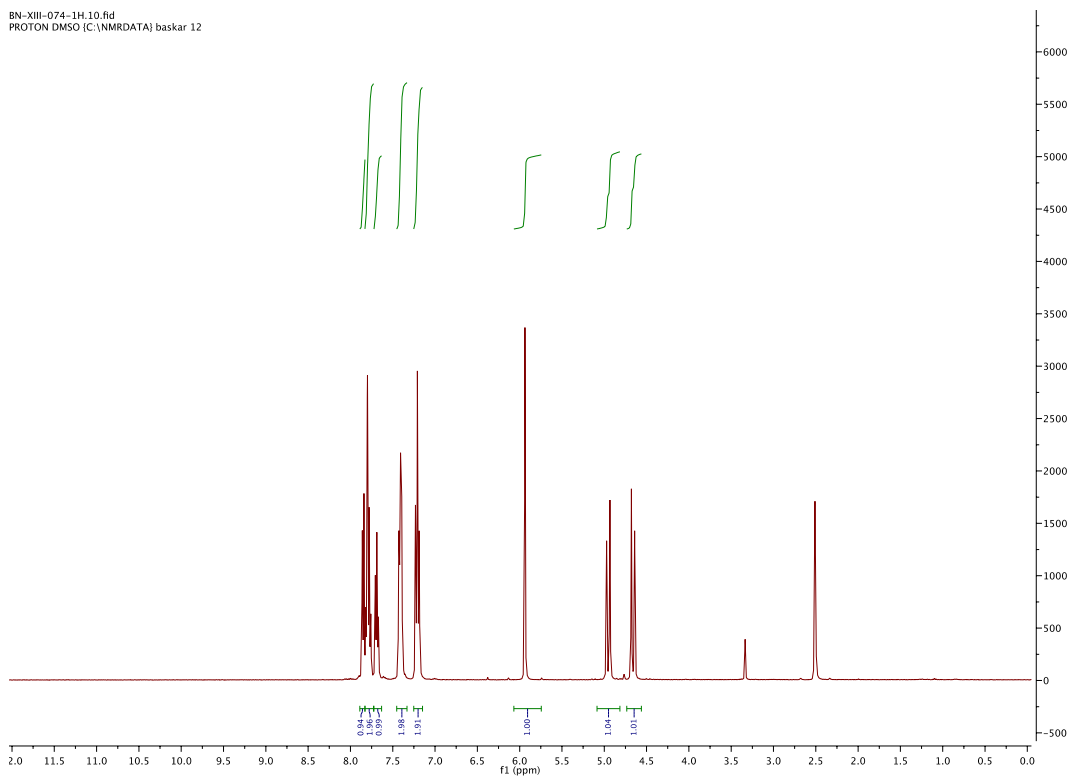

BN-XIII-074-13C.10.fid  
C13CPD DMSO (C:\NMRDATA) baskar 12

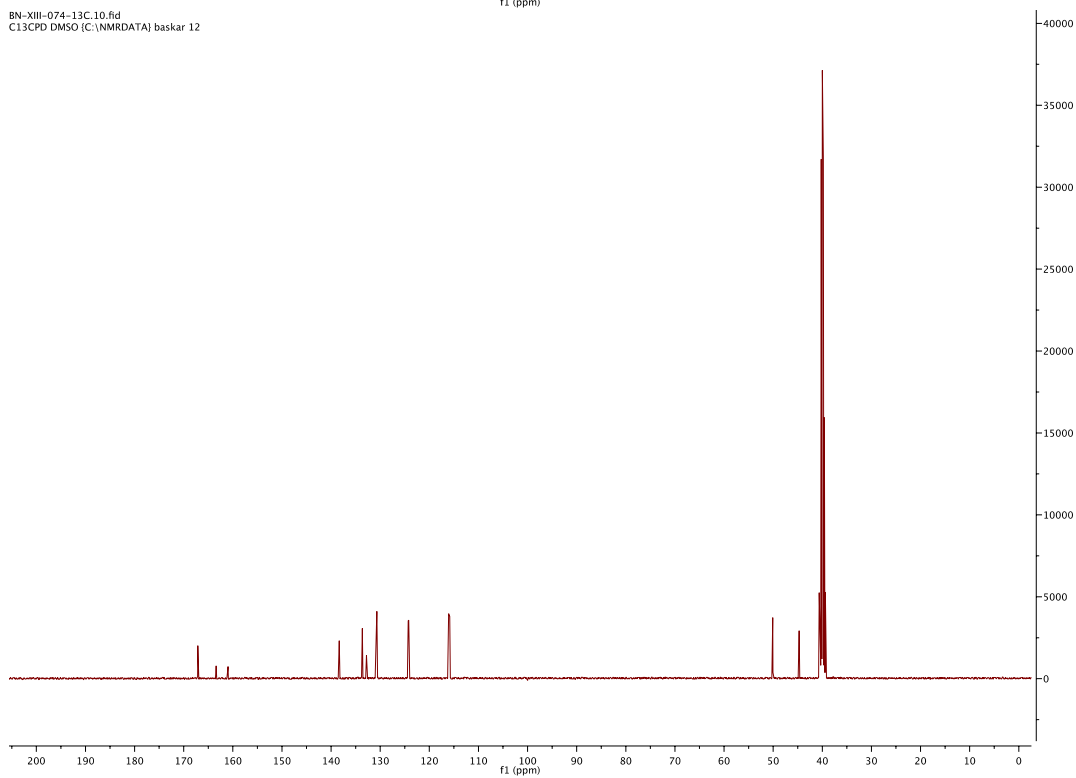

# (±)-2-(3-Methoxybenzyl)-3-oxoindoline-1-carbonitrile (3d)

BN-IV-013-1H.10.fid  
PROTON DMSO (C:\NMRDATA) baskar 11

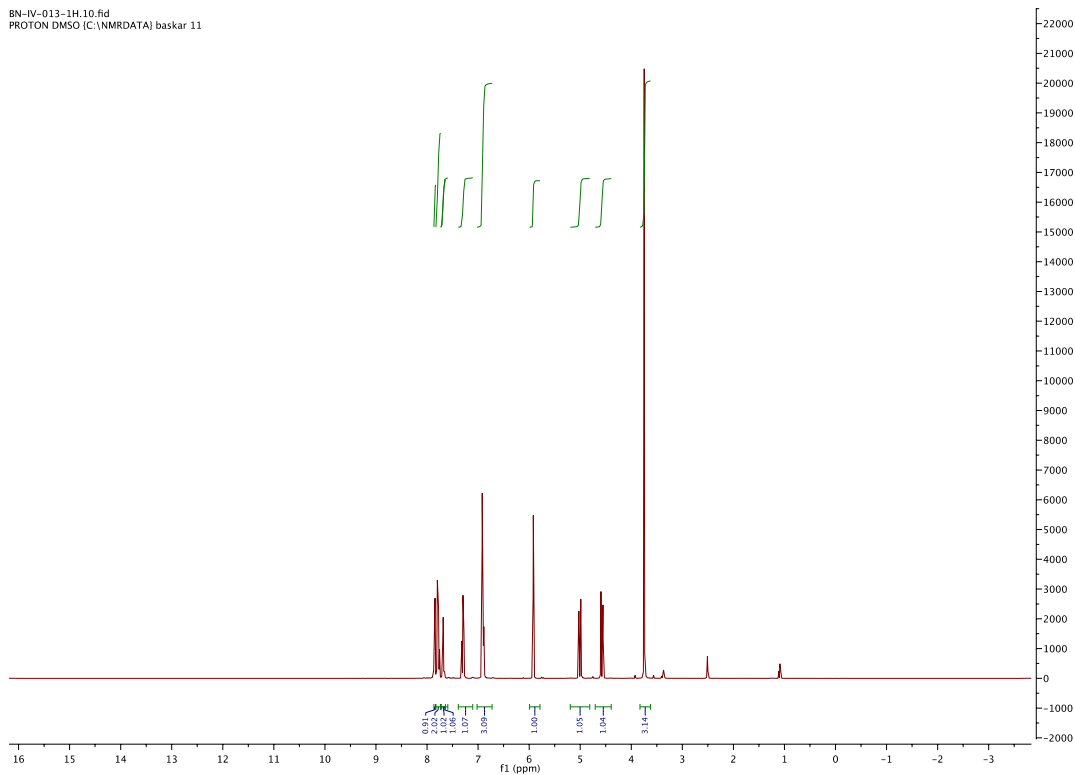

BN-IV-013-13C.10.fid  
C13CPD DMSO (C:\NMRDATA) baskar 11

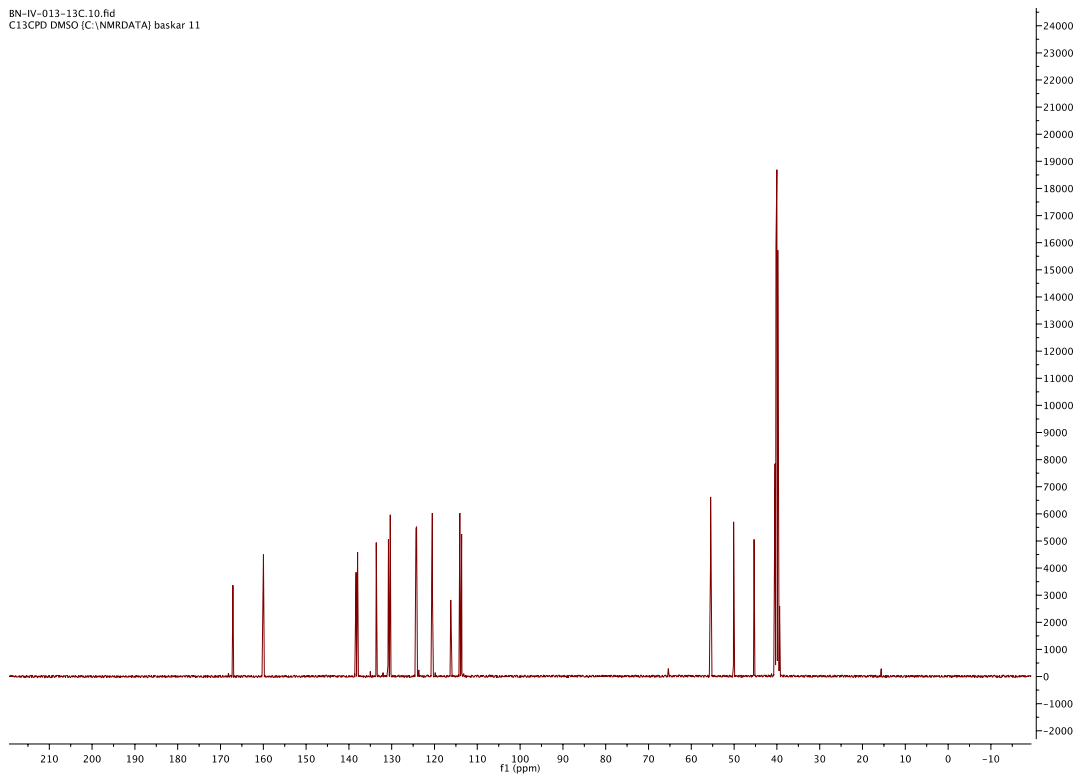

# (±)-2-(4-Methoxybenzyl)-3-oxoindoline-1-carbonitrile (3e)

BN-IV\_012-10.fid  
PROTON DMSO [C:\NMRDATA] baskar 22

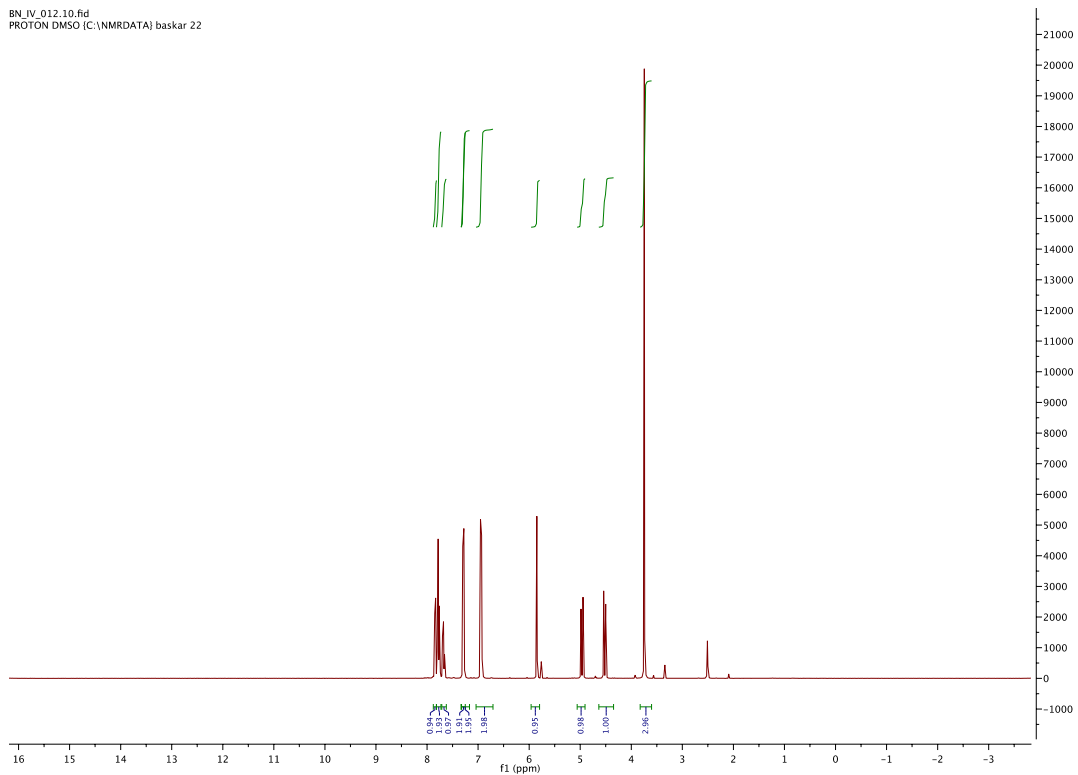

BN-IV-012-13C.10.fid  
C13CPD CDCl3 [C:\NMRDATA] baskar 22

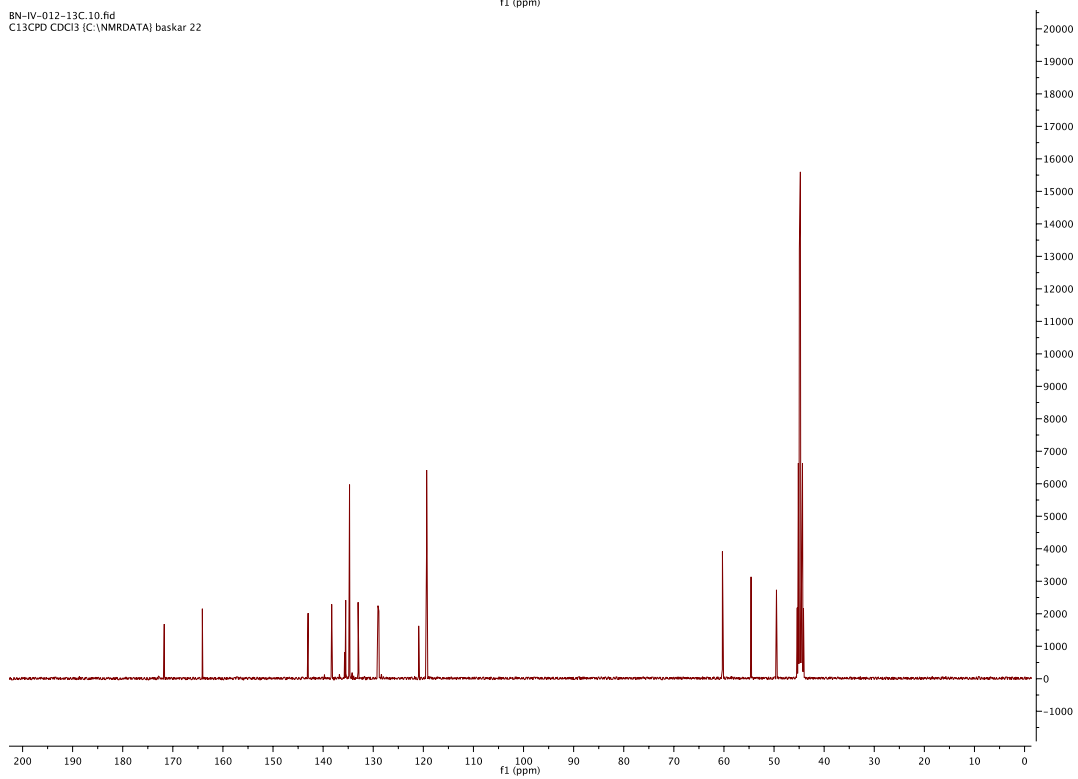

# (±)-2-[(4-Trifluoromethyl)benzyl]-3-oxoisindoline-1-carbonitrile (3f)

BN-XIII-082-1H.10.fid  
PROTON DMSO [C:\NMRDATA] murieha 12

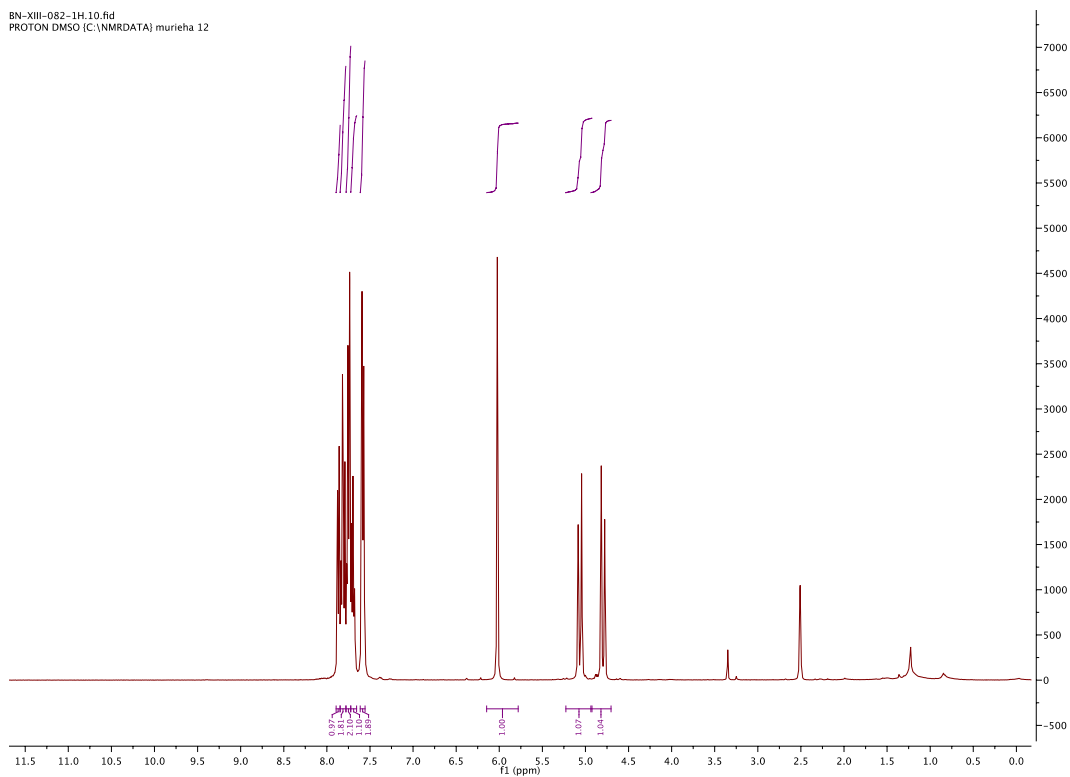

BN-XIII-082-13C.10.fid  
C13CPD DMSO [C:\NMRDATA] murieha 12

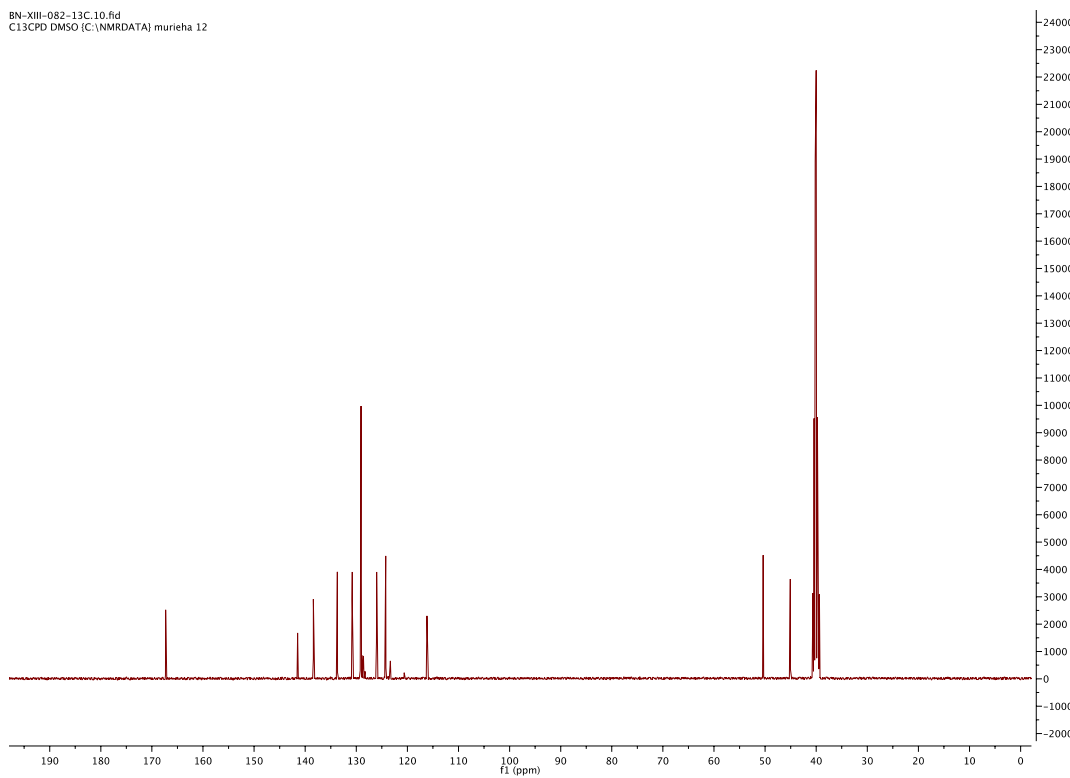



# (±)-3-Oxo-2-(2-phenylethyl)isoindoline-1-carbonitrile (3g)

MM-01-075-1H.10.fid  
PROTON CDCl3 [C:\NMRDATA] baskar 9

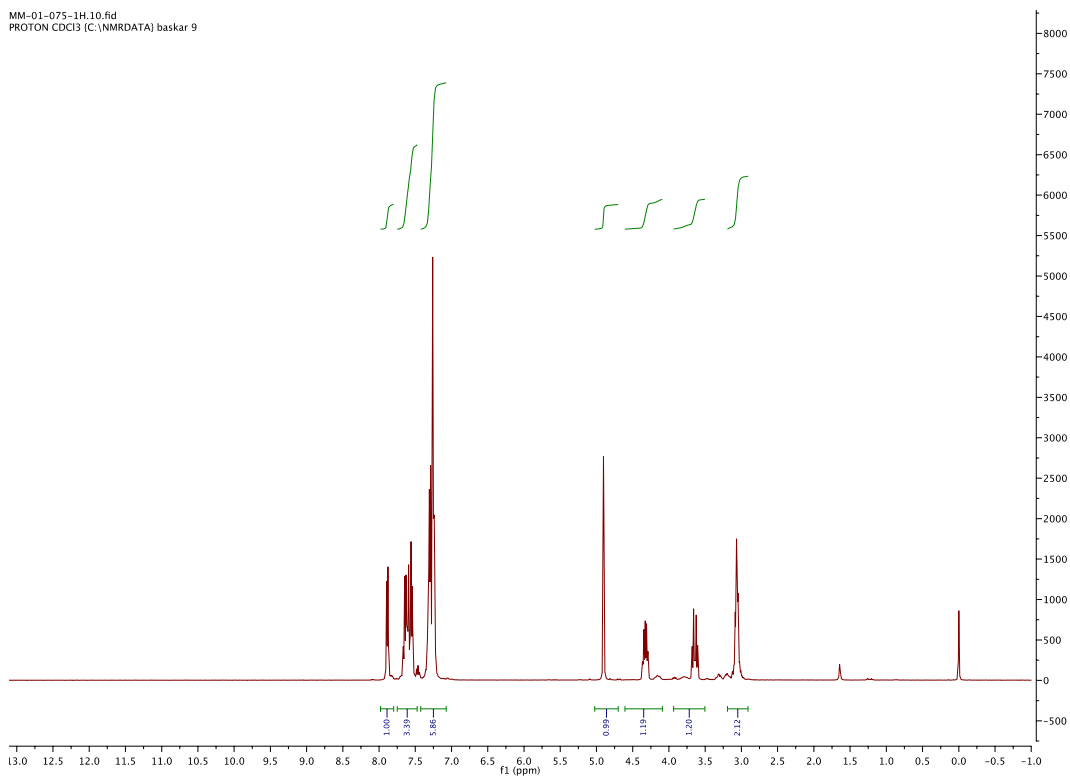

MM-01-075-13C.10.fid  
C13CPD CDCl3 [C:\NMRDATA] baskar 9

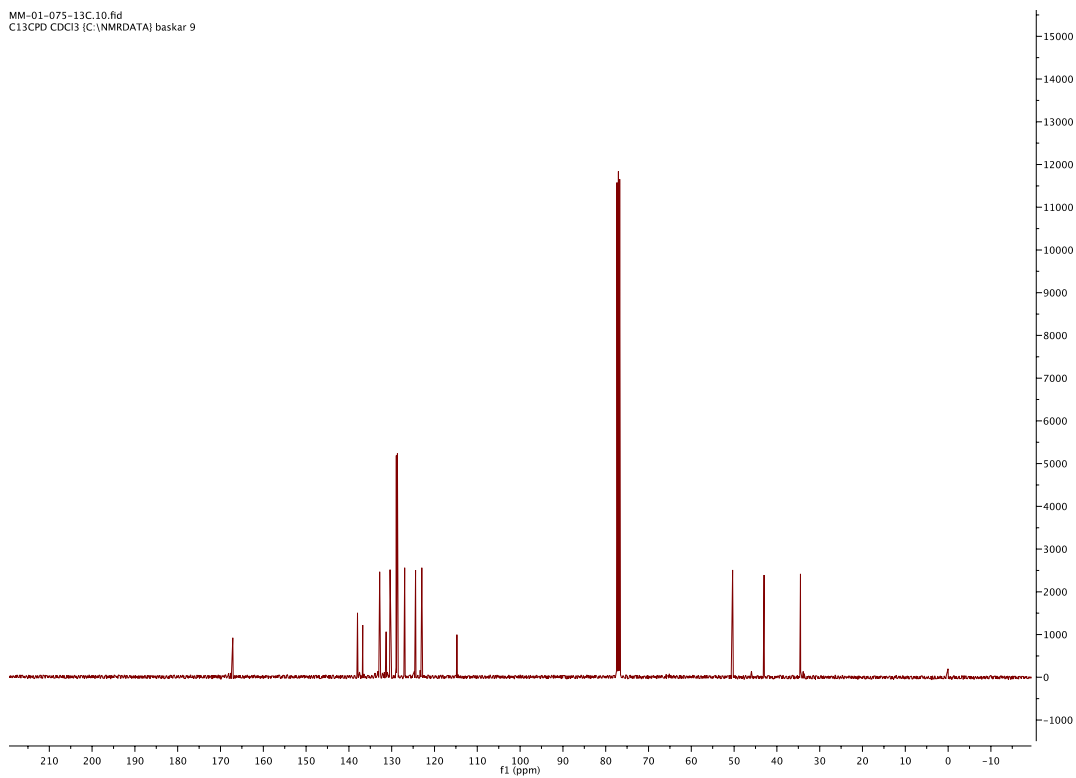

# (±)-2-Allyl-3-oxoisindoline-1-carbonitrile (3h)

BN-IV-014-1H.10.fid  
PROTON CDCl3 [C:\NMRDATA] baskar 10

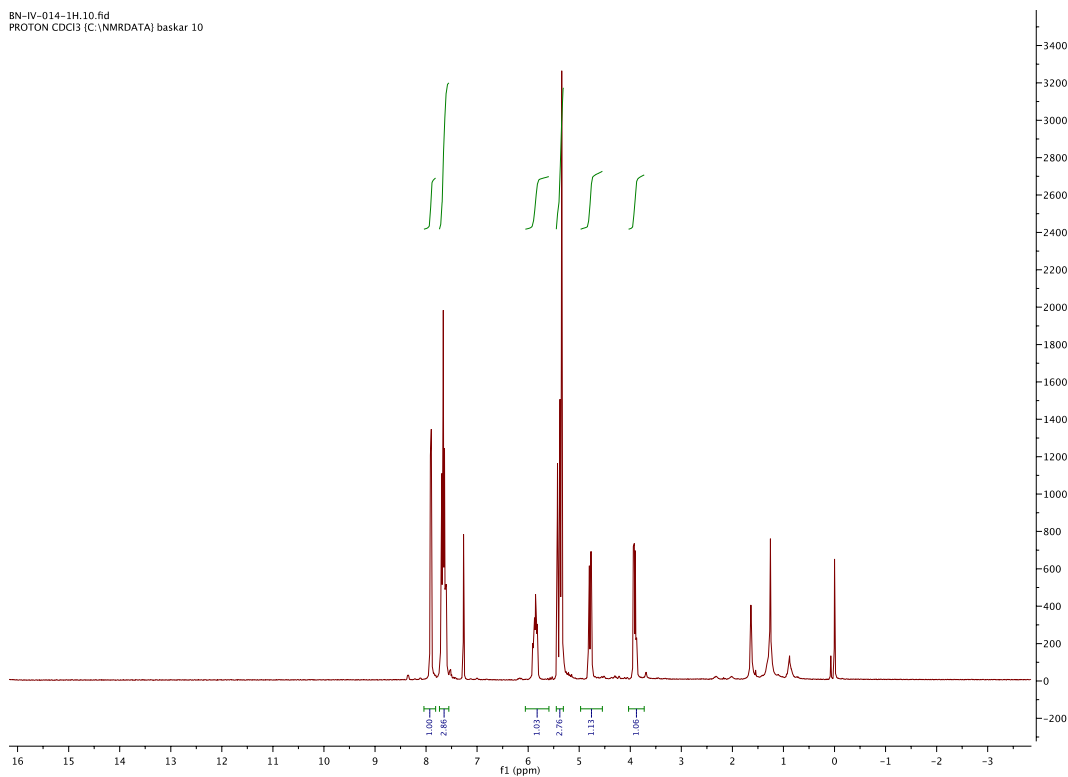

BN-IV-014-13C.10.fid  
C13CPD CDCl3 [C:\NMRDATA] baskar 10

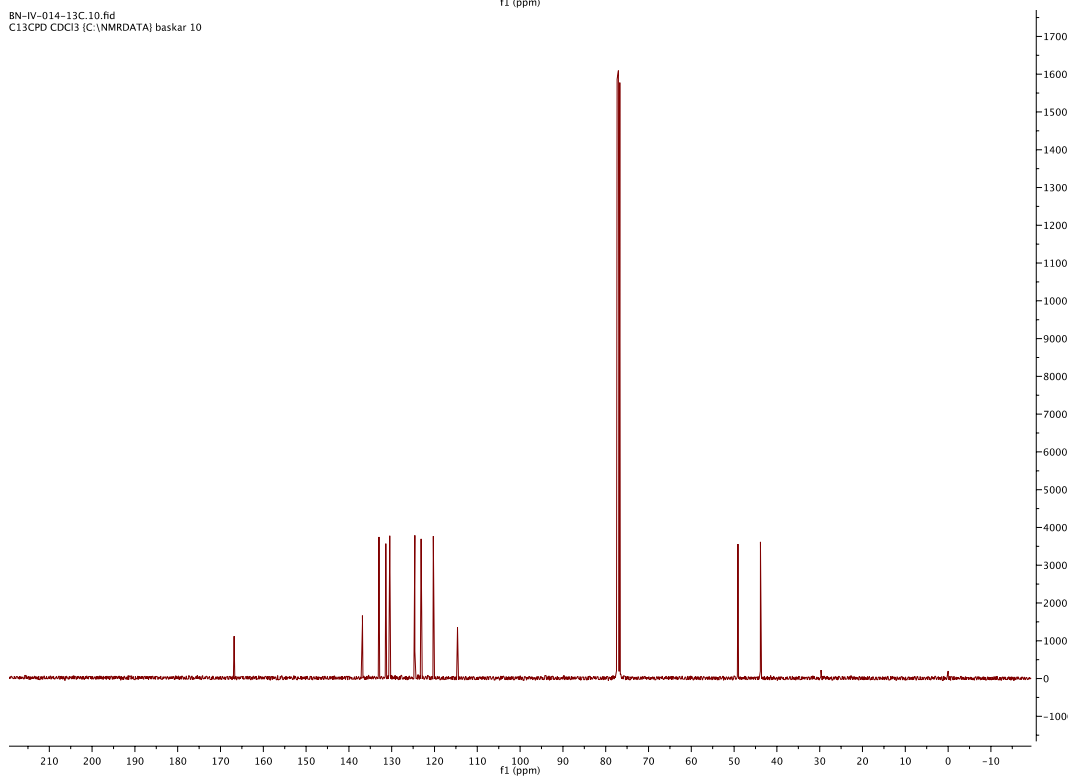

# (±)-2-Cyclopropyl-3-oxoisindoline-1-carbonitrile (3i)

BN-IV-021-1H.fid  
PROTON CDCl3 (C:\NMRDATA) baskar 8

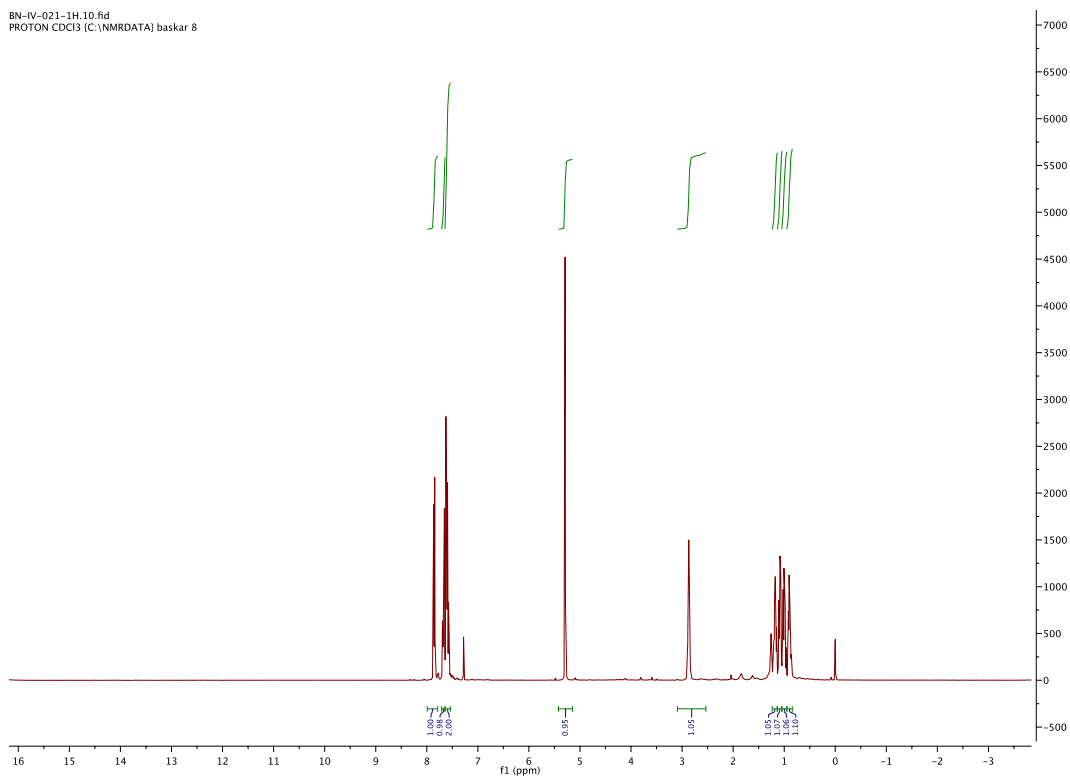

BN-IV-021-13C.fid  
C13CPD CDCl3 (C:\NMRDATA) baskar 8

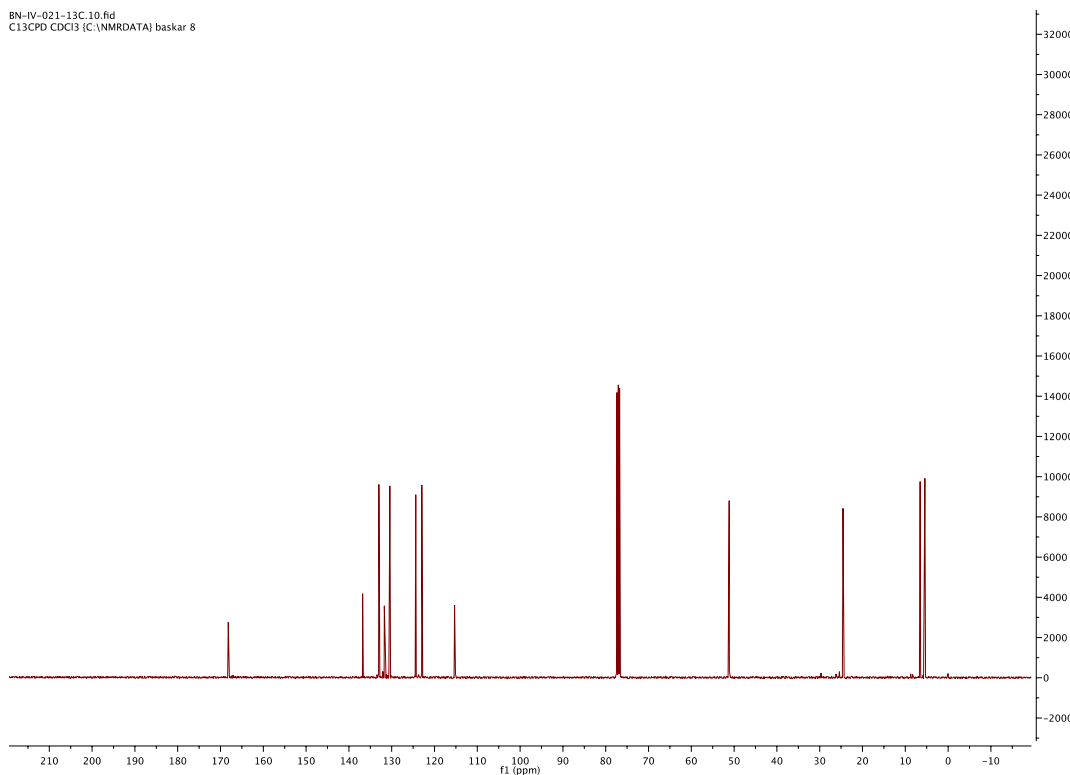

# (±)-2-Ethyl-3-oxoisindoline-1-carbonitrile (3j)

JH-01-030-1H.10.fid  
PROTON CDCl3 (C:\NMRDATA) baskar 11

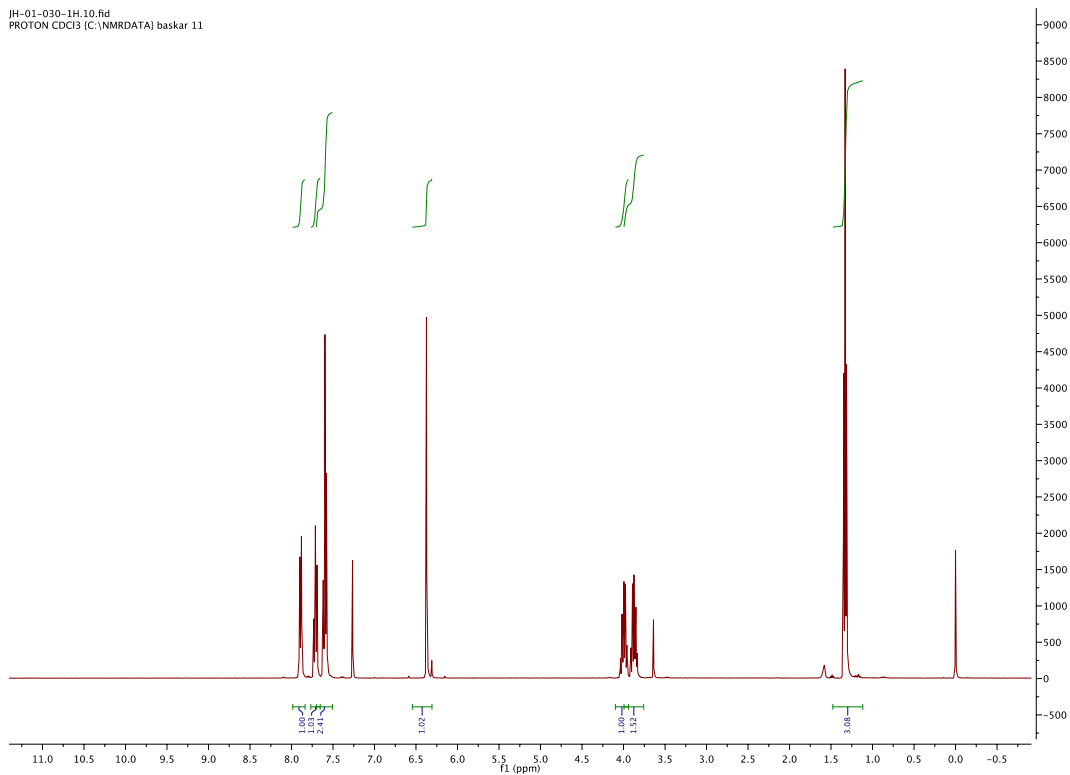

JH-01-30-13C.10.fid  
C13CPD CDCl3 (C:\NMRDATA) baskar 11

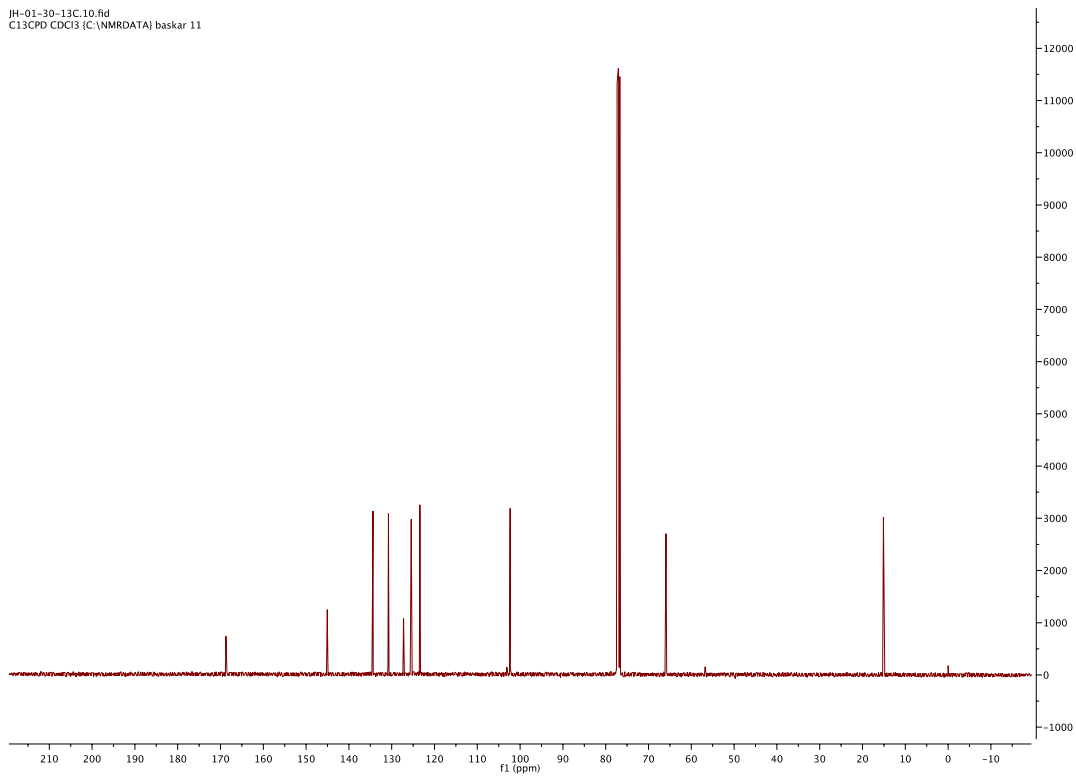

# (±)-2-Benzyl-3-oxoisindoline-1-carboxamide (4a)

BN-IV-020-1H.10.fid  
PROTON DMSO [C:\NMRDATA] baskar 12

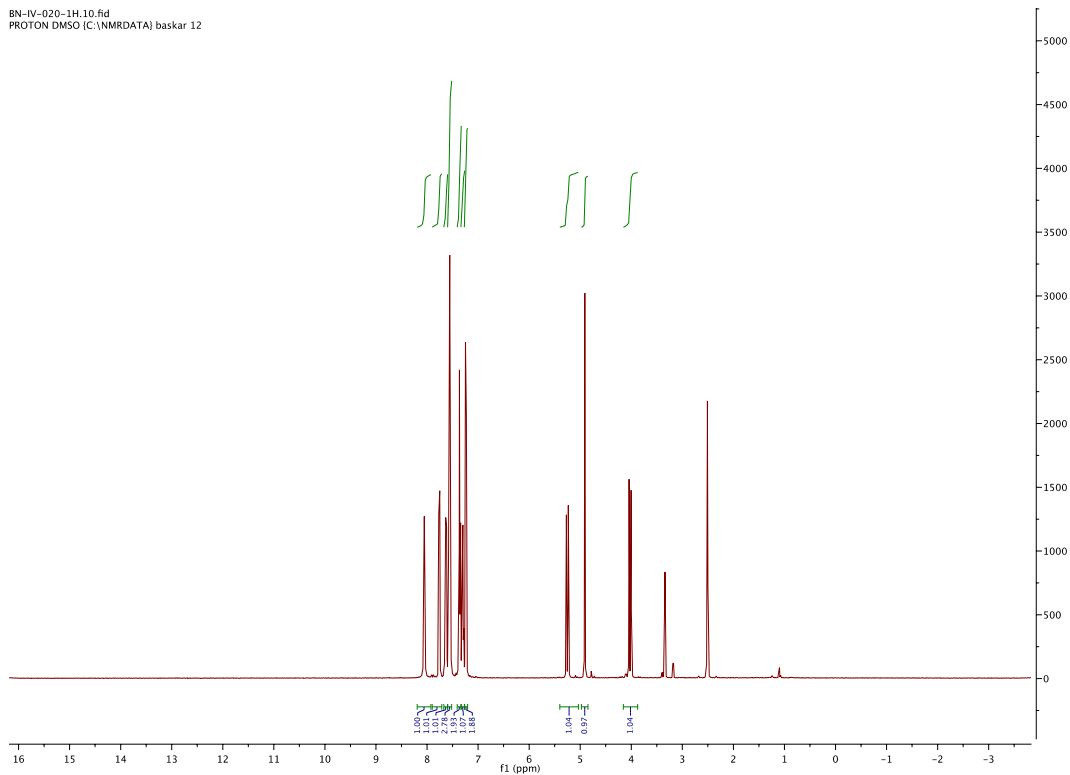

BN-IV-020-13C.10.fid  
C13CPD DMSO [C:\NMRDATA] baskar 12

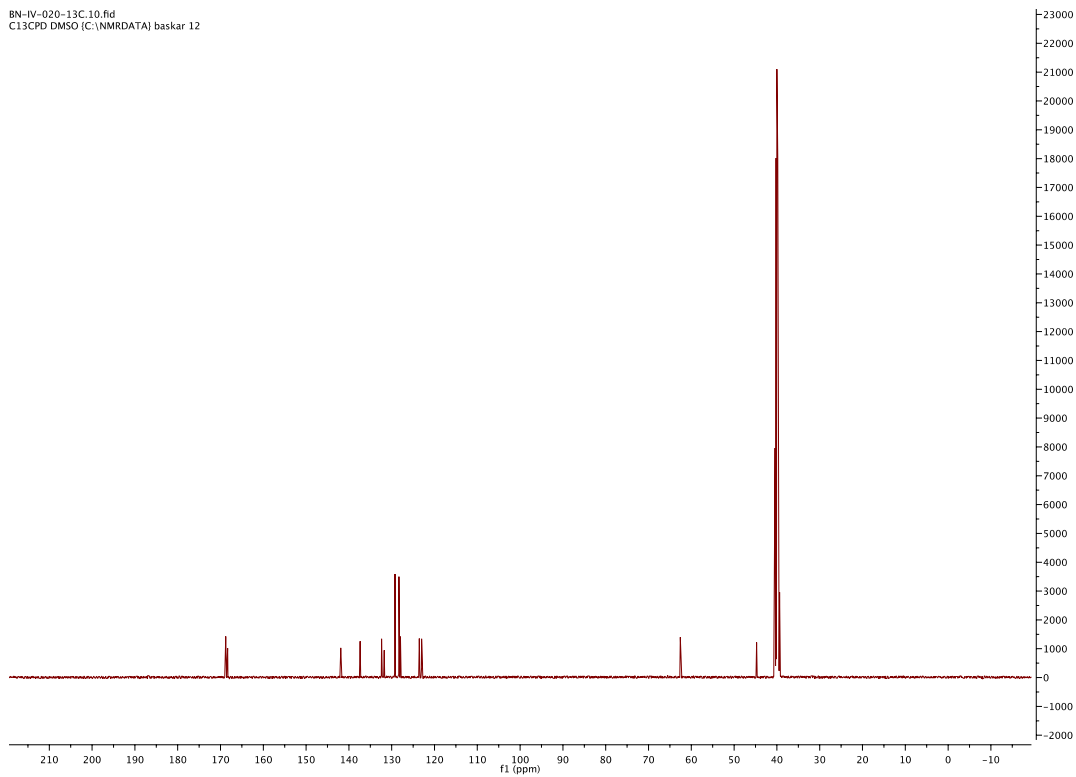

# (±)-2-(4-Chlorobenzyl)-3-oxoisindoline-1-carboxamide (4b)

BN-IV-016-1H.20.fid  
PROTON DMSO (C:\NMRDATA) baskar 9

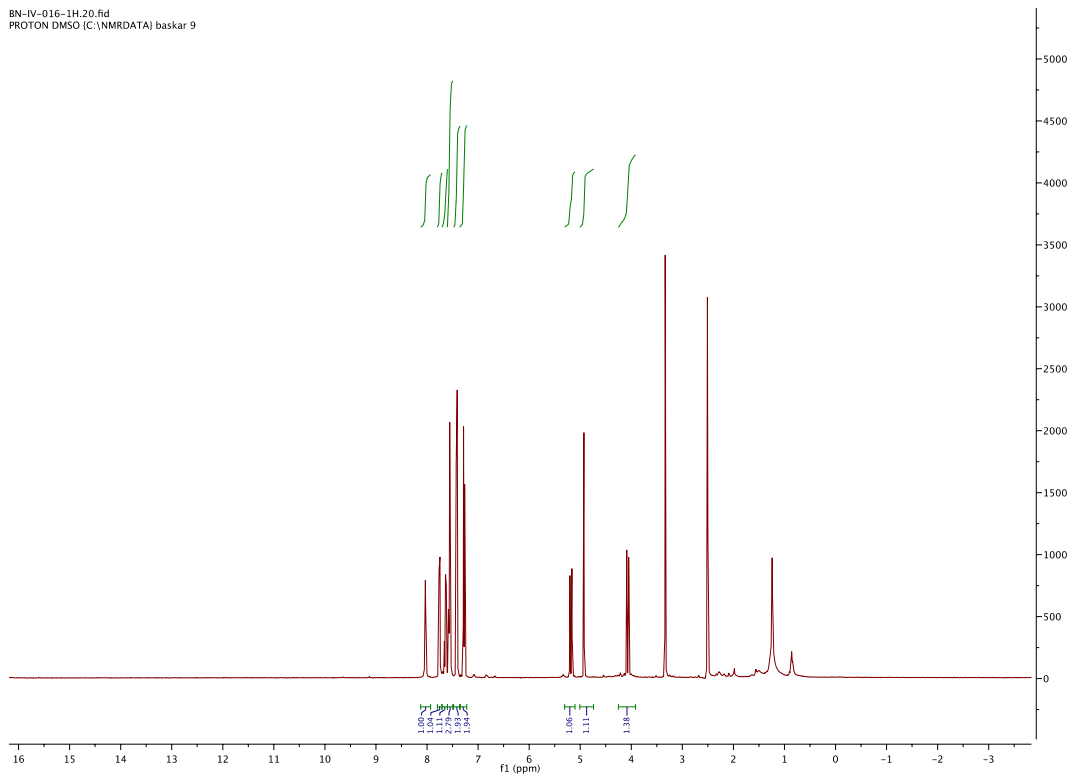

BN-IV-016-13C.20.fid  
C13CPD DMSO (C:\NMRDATA) baskar 9

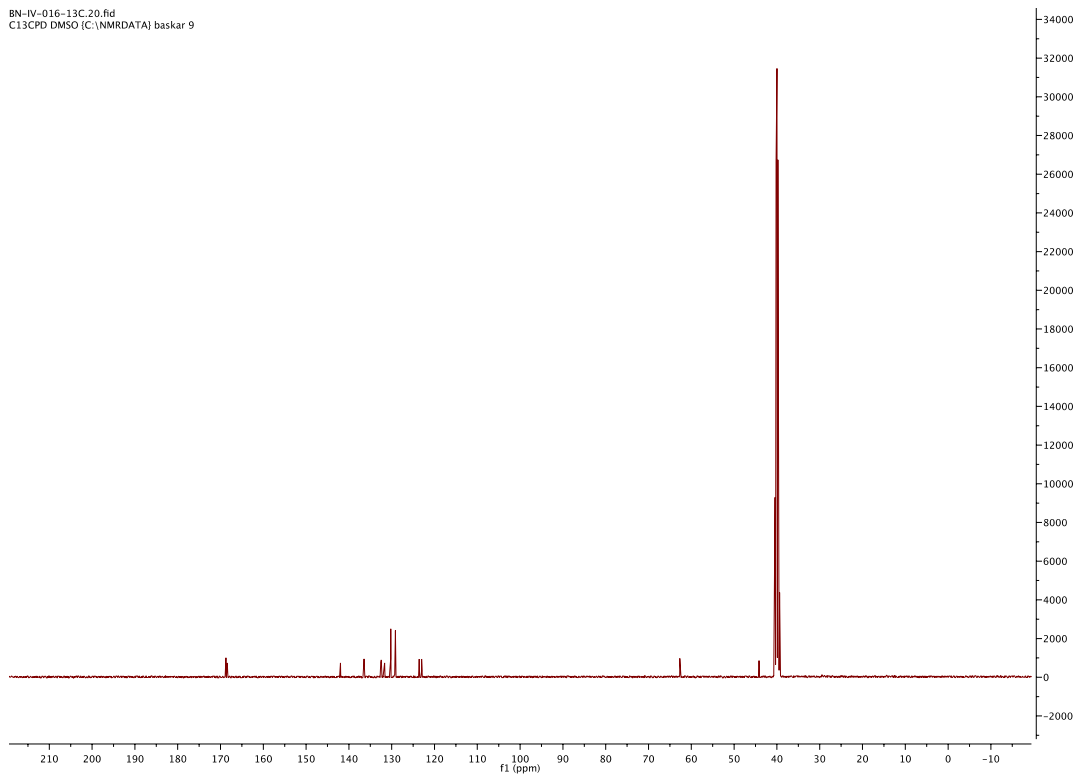

# (±)-2-(3-Methoxybenzyl)-3-oxoisindoline-1-carboxamide (4c)

BN-IV-07-1H.10.fid  
PROTON DMSO [C:\NMRDATA] baskar 7

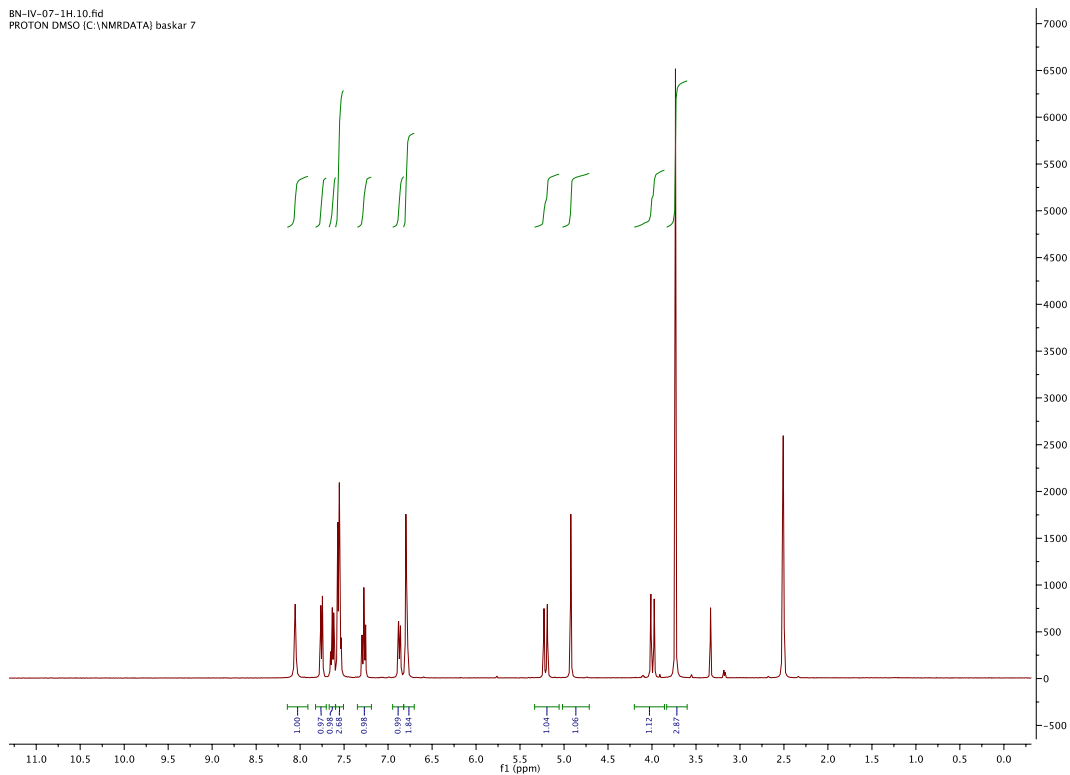

BN-IV-07-13C.10.fid  
C13CPD DMSO [C:\NMRDATA] baskar 7

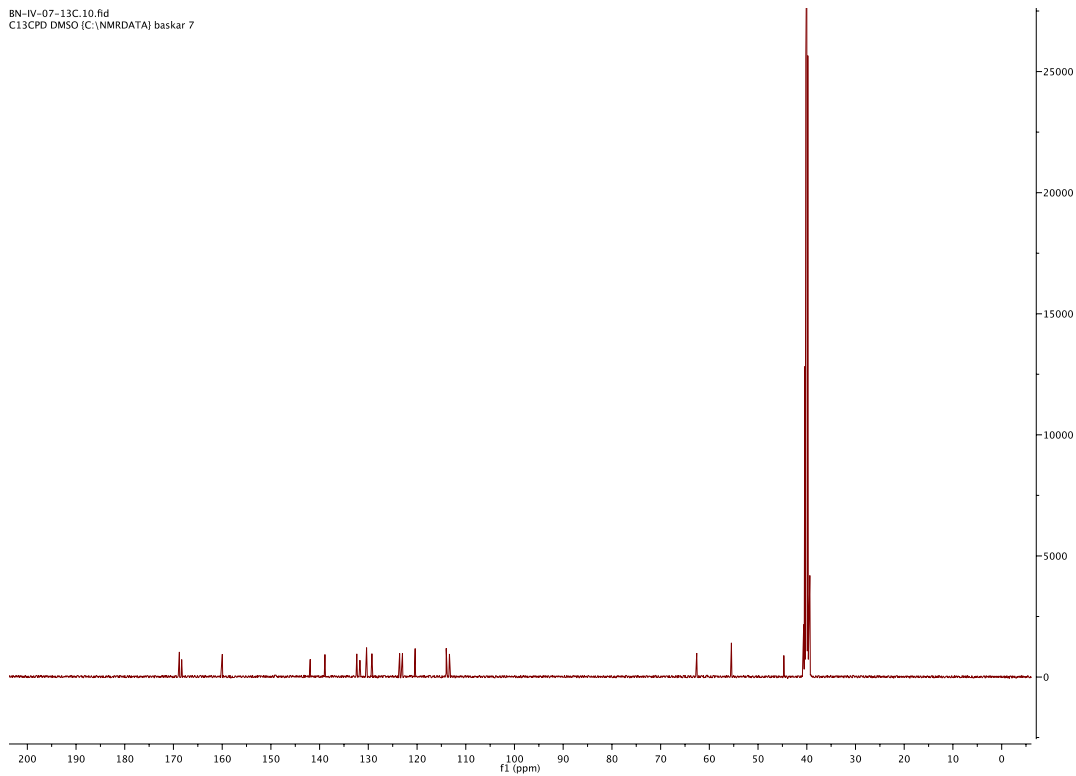

# (±)-2-(4-Methoxybenzyl)-3-oxoisindoline-1-carboxamide (4d)

BN-IV-05-1H.10.fid  
PROTON DMSO [C:\NMRDATA] baskar 14

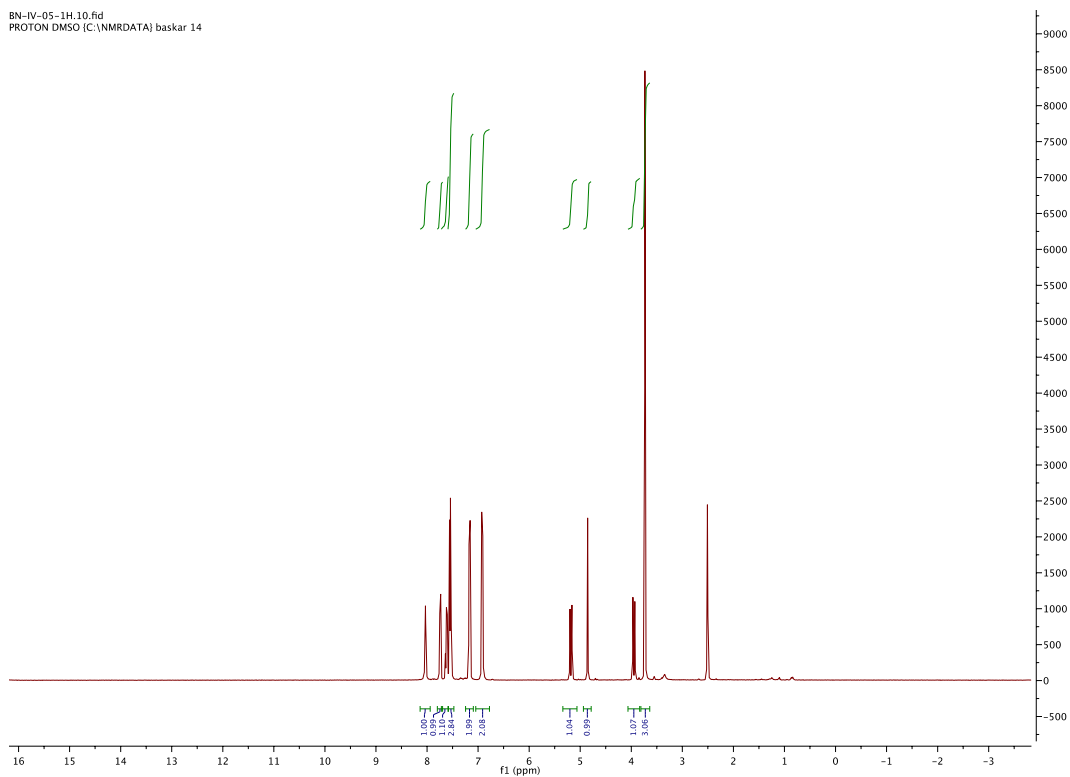

BN-IV-05-13C.10.fid  
C13CPD DMSO [C:\NMRDATA] baskar 14

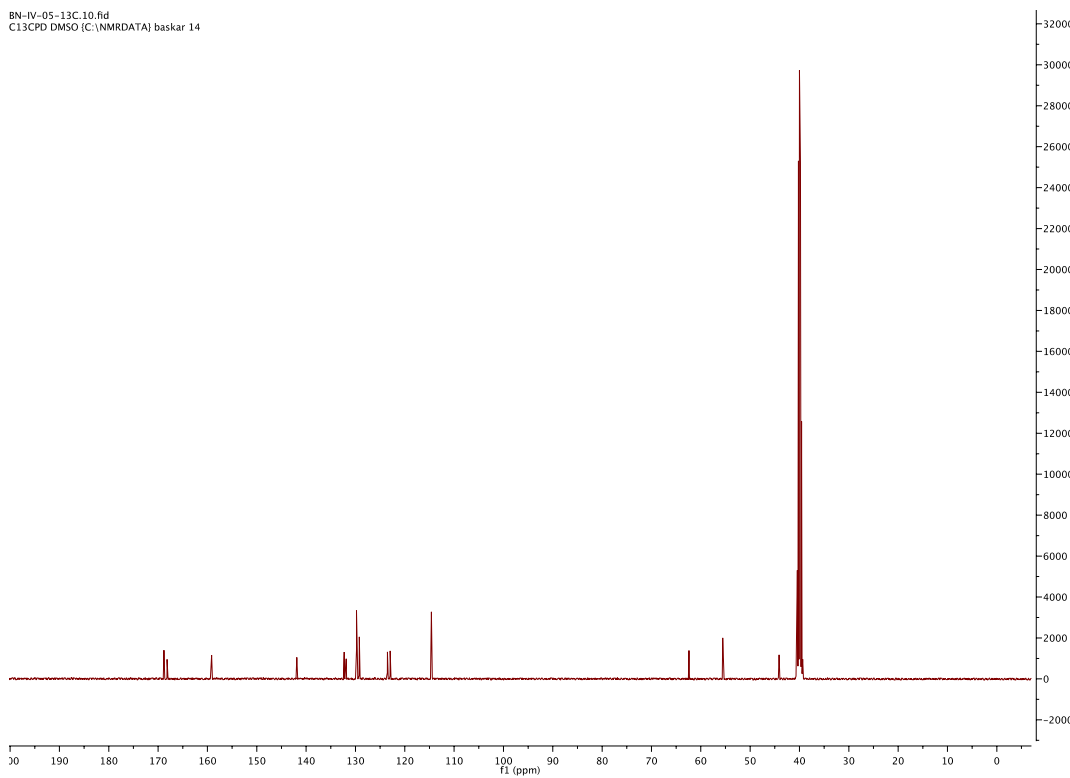



# (±)-2-(4-Methylbenzyl)-3-oxoisindoline-1-carboxamide (4e)

BN-XIII-081-1H.10.fid  
PROTON DMSO [C:\NMRDATA] baskar 13

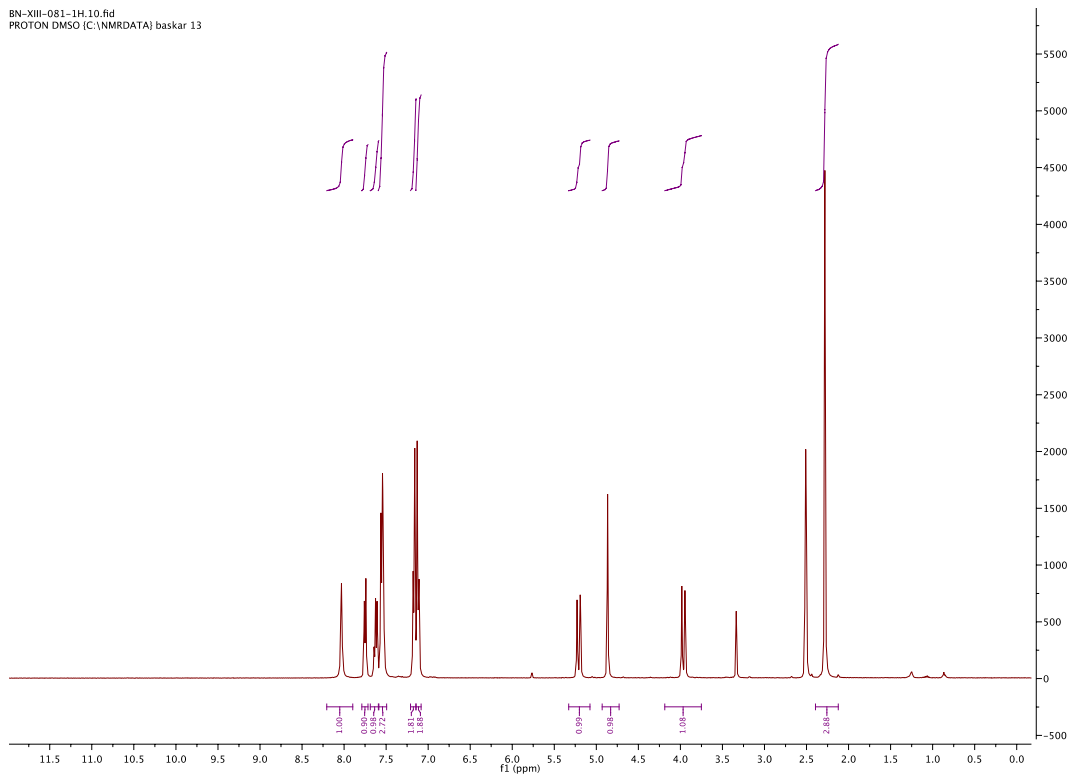

BN-XIII-081-13C.10.fid  
C13CPD DMSO [C:\NMRDATA] baskar 13

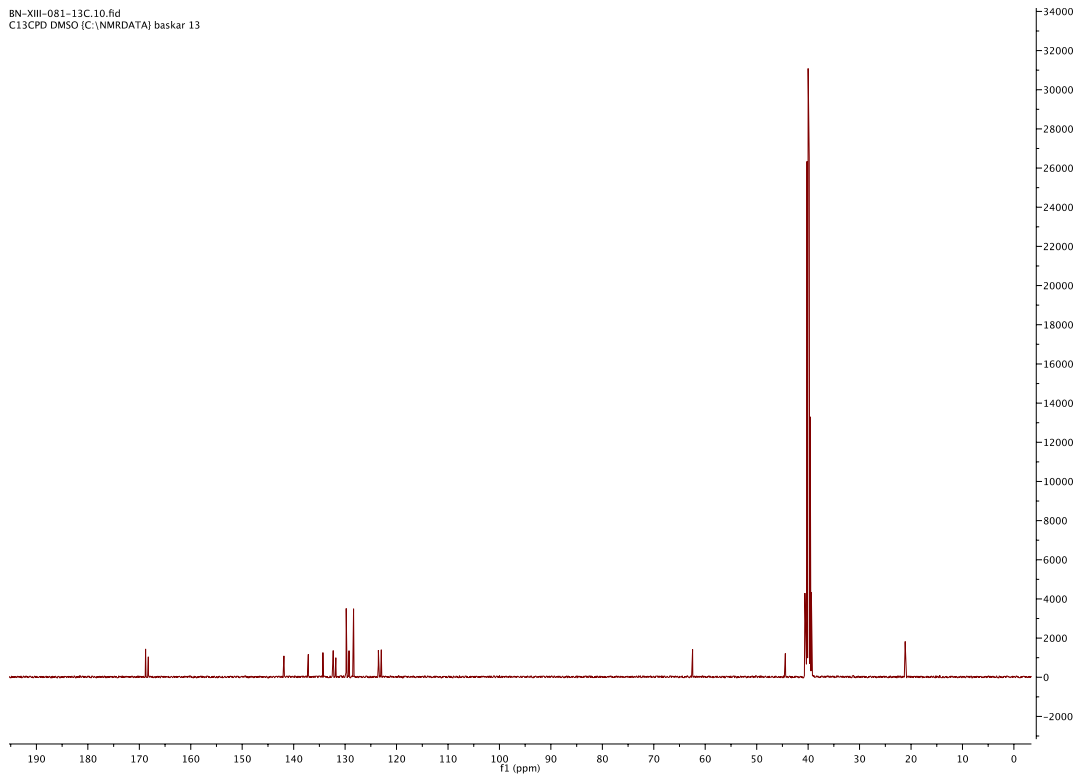

# (±)-2-Cyclohexyl-3-oxoisindoline-1-carboxamide (4f)

BN-XIII-086.10.fid  
PROTON DMSO (C:\NMRDATA) murieha 16

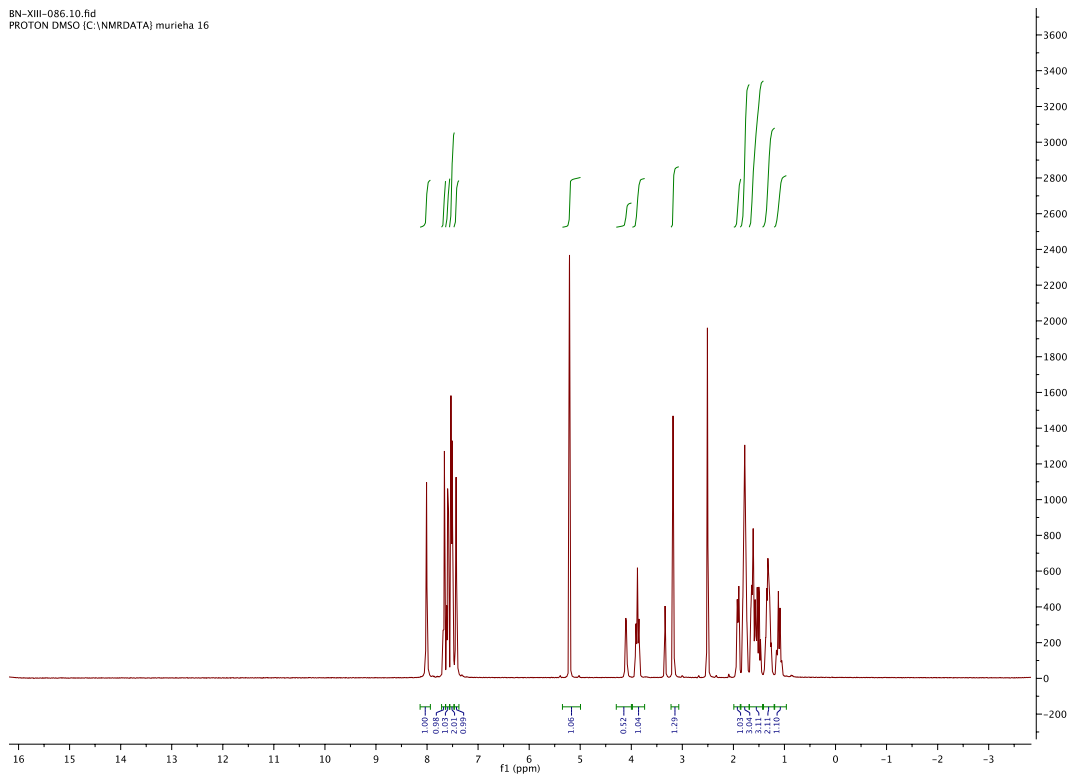

BN-XIII-086.11.fid  
C13CPD DMSO (C:\NMRDATA) murieha 16

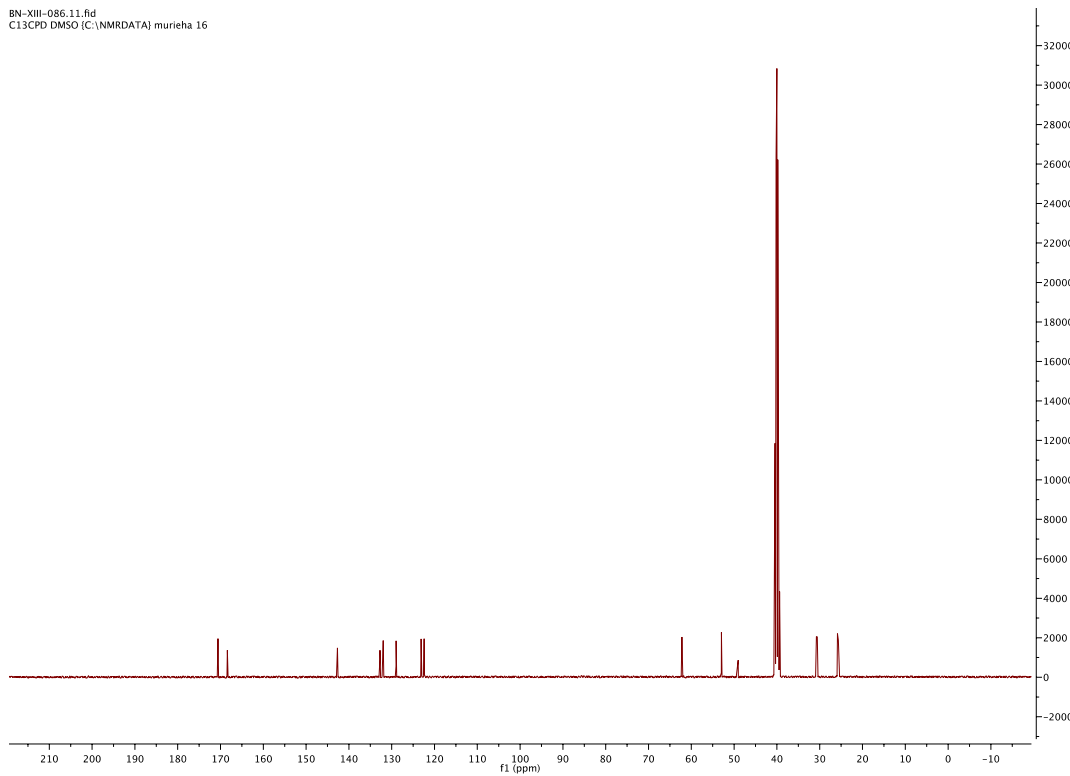

# (±)-2-Hexyl-3-oxoisindoline-1-carboxamide (4g)

BN-IV-010-1H.10.fid  
PROTON DMSO (C:\NMRDATA) baskar 13

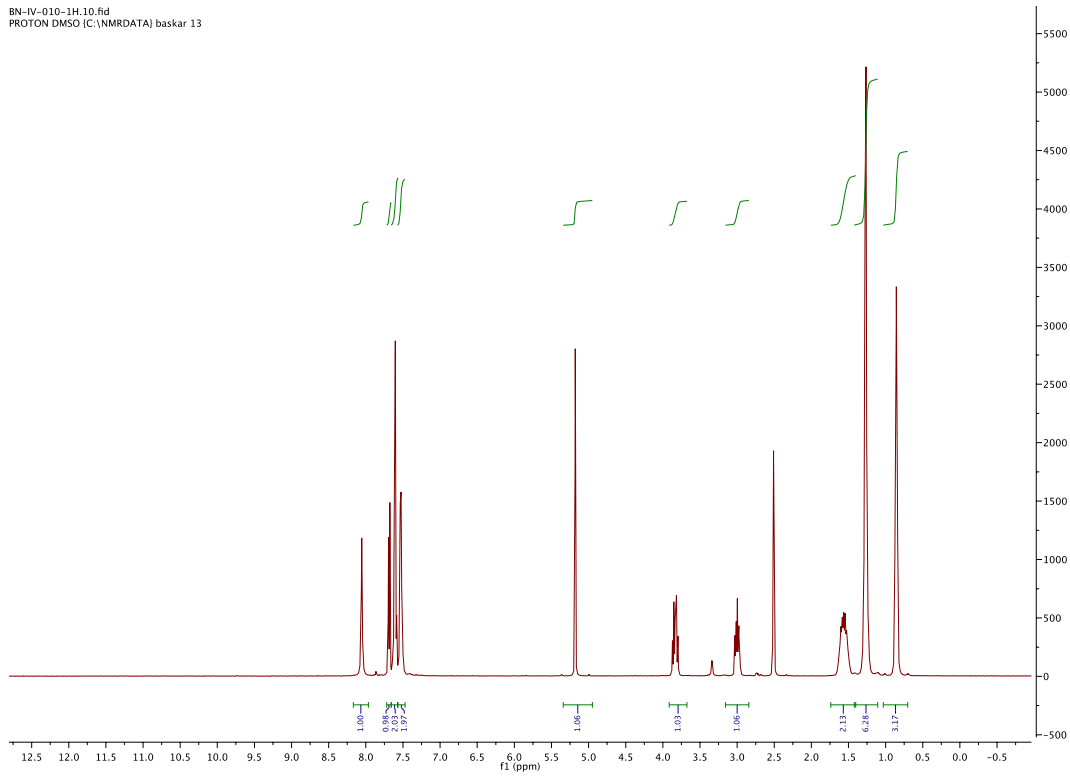

BN-IV-010-13C.10.fid  
C13CPD DMSO (C:\NMRDATA) baskar 13

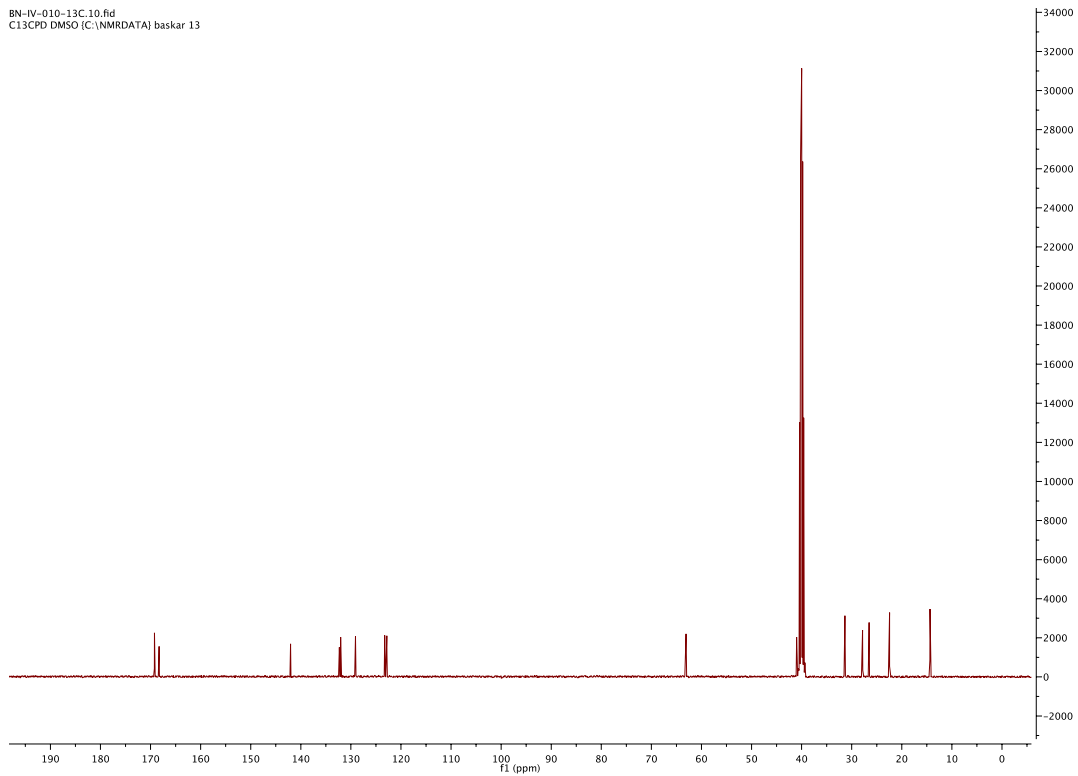

# (±)-2-Isobutyl-3-oxoisindoline-1-carboxamide (4h)

BN-IV-011-1H.10.fid  
PROTON DMSO (C:\NMRDATA) baskar 8

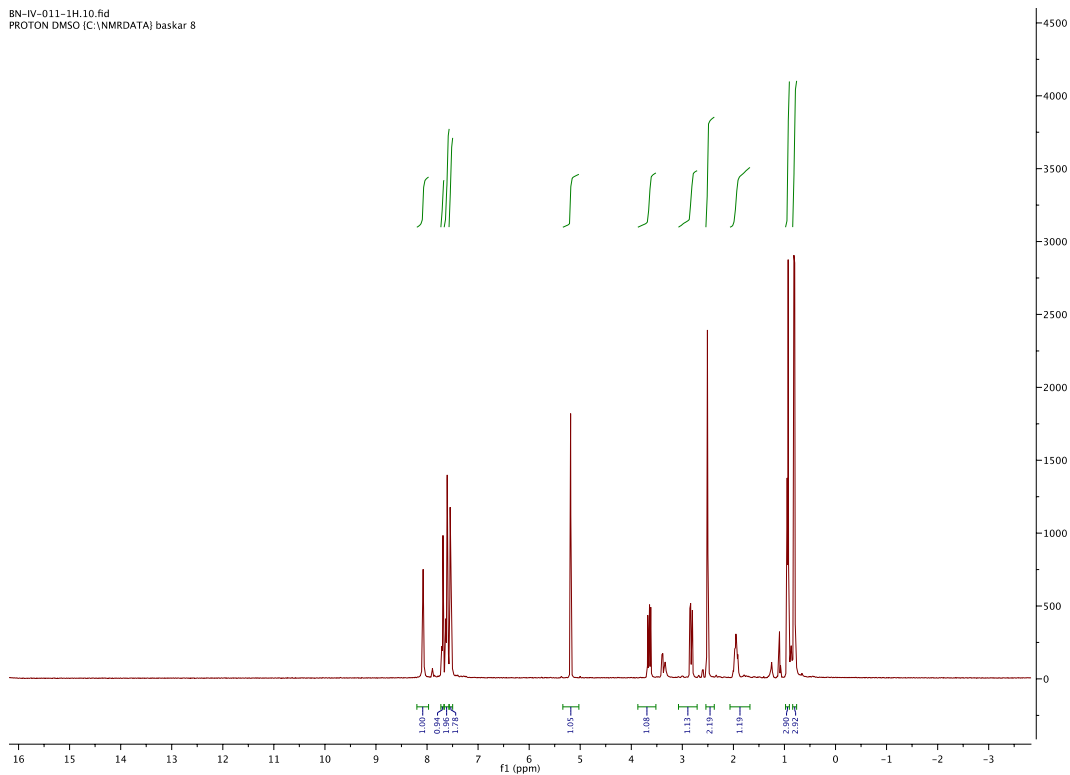

BN-IV-011-13C.10.fid  
C13CPD DMSO (C:\NMRDATA) baskar 8

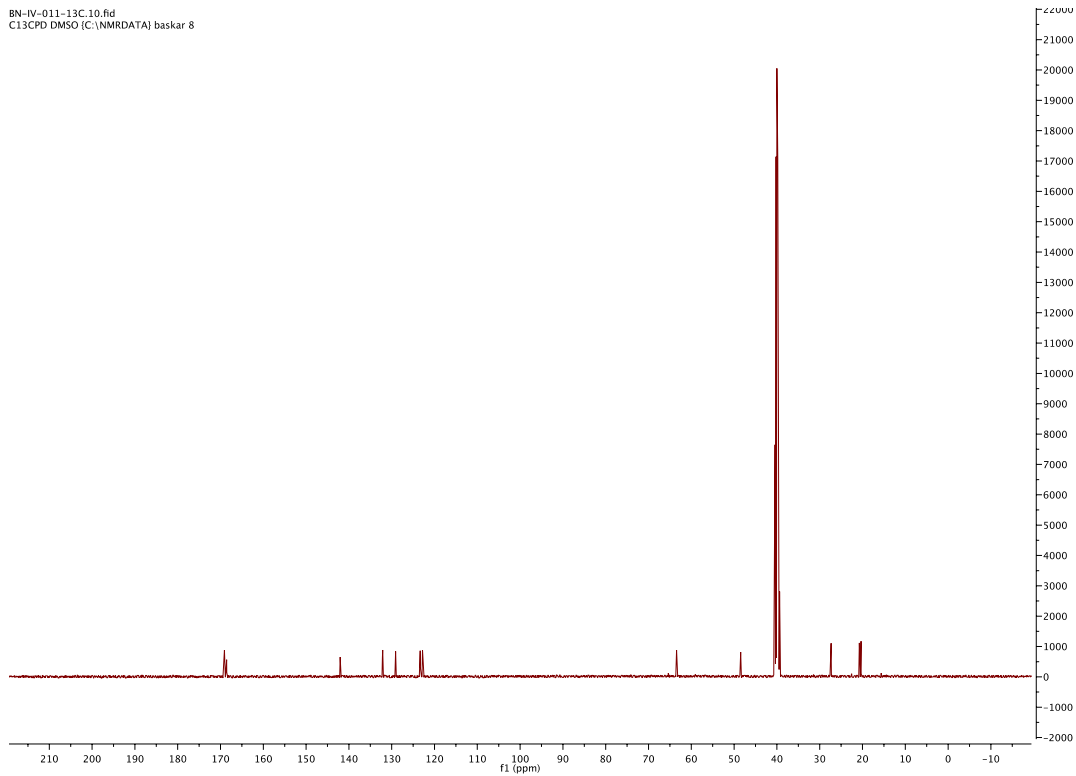

# (±)-3-(Phenylamino)isobenzofuran-1(3*H*)-one (6a)

BN-XIII-077-1H.10.fid  
PROTON DMSO (C:\NMRDATA) baskar 11

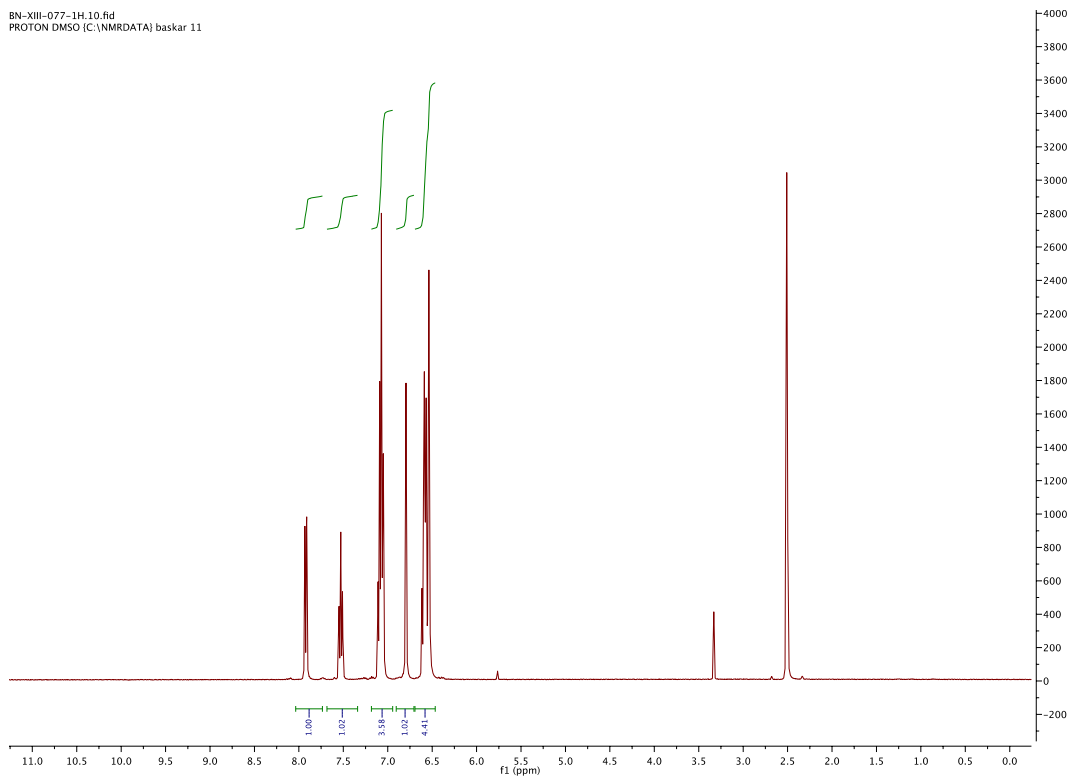

BN-XIII-077-13C.10.fid  
C13CPD DMSO (C:\NMRDATA) baskar 11

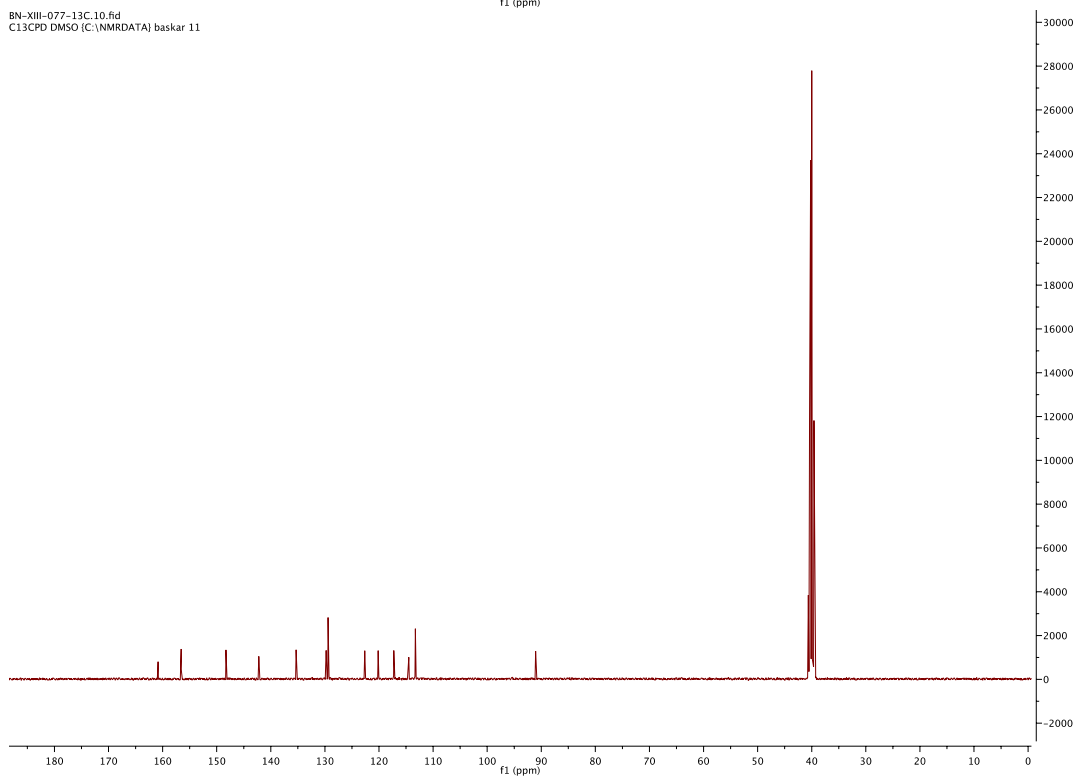

# (±)-3-[(3-Chlorophenyl)amino]isobenzofuran-1(3H)-one (6b)

BN-XIII-079-1H.10.fid  
PROTON DMSO [C:\NMRDATA] murieha 44

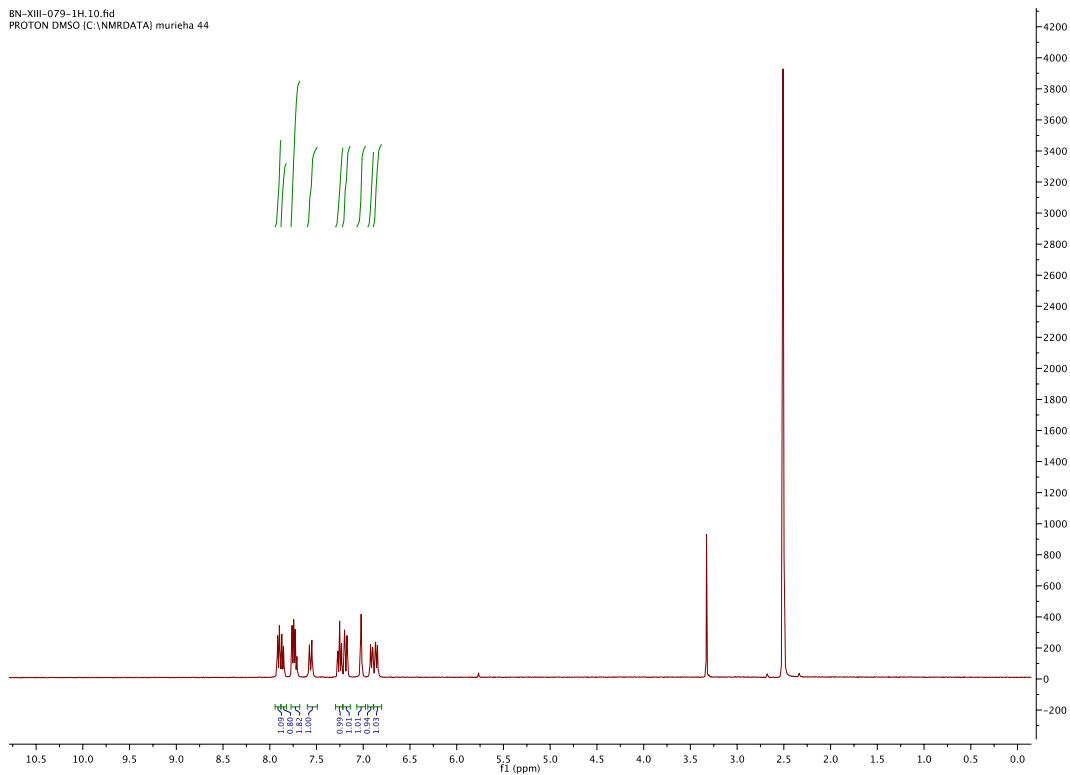

BN-XIII-079-13C.10.fid  
C13CPD DMSO [C:\NMRDATA] murieha 44

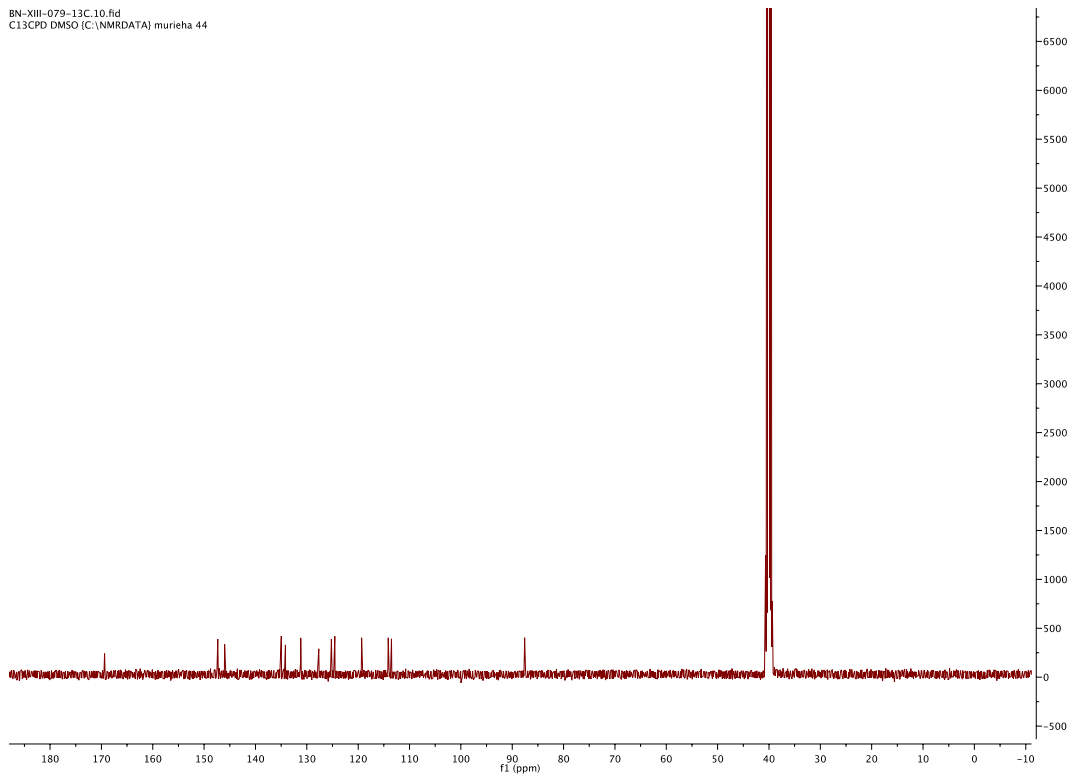

# (±)-3-[(4-Methoxyphenyl)amino]isobenzofuran-1(3H)-one (6c)

BN-XIII-078-1H-2.10.fid  
PROTON DMSO [C:\NMRDATA] murieha 17

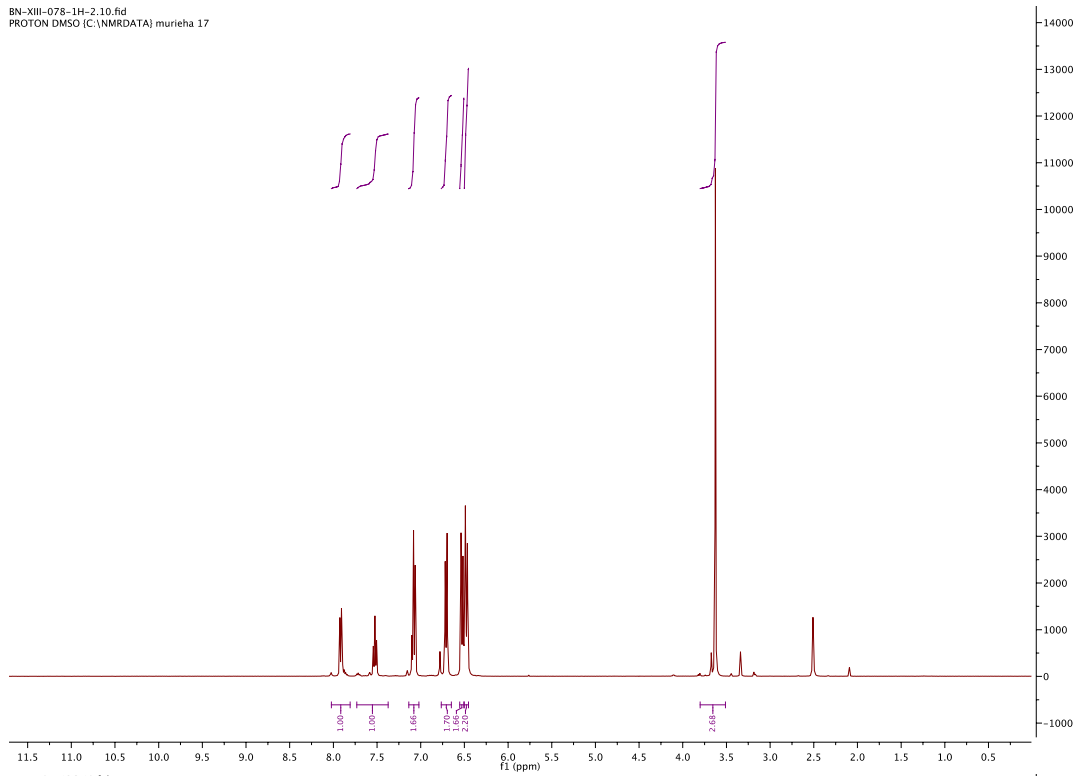

BN-IV-04-13C.10.fid  
C13CPD DMSO [C:\NMRDATA] baskar 15

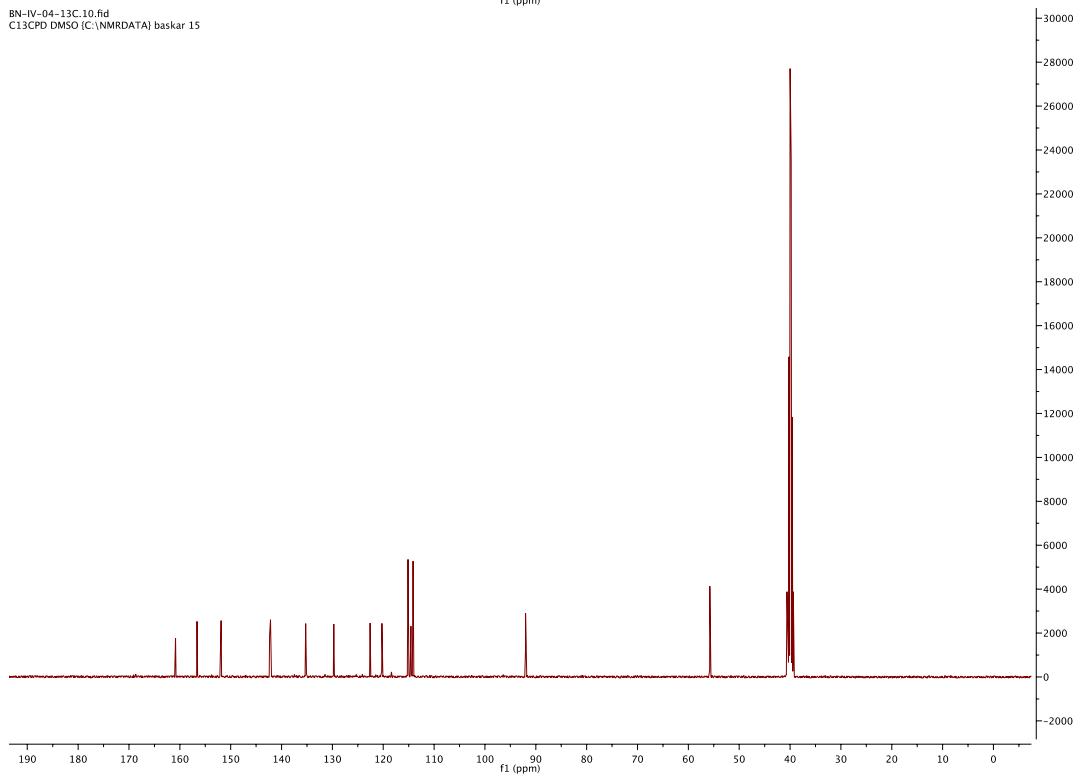

# (±)-3-[(4-Nitrophenyl)amino]isobenzofuran-1(3H)-one (6d)

BN-XIII-084-1H.10.fid  
PROTON DMSO (C:\NMRDATA) murieha 13

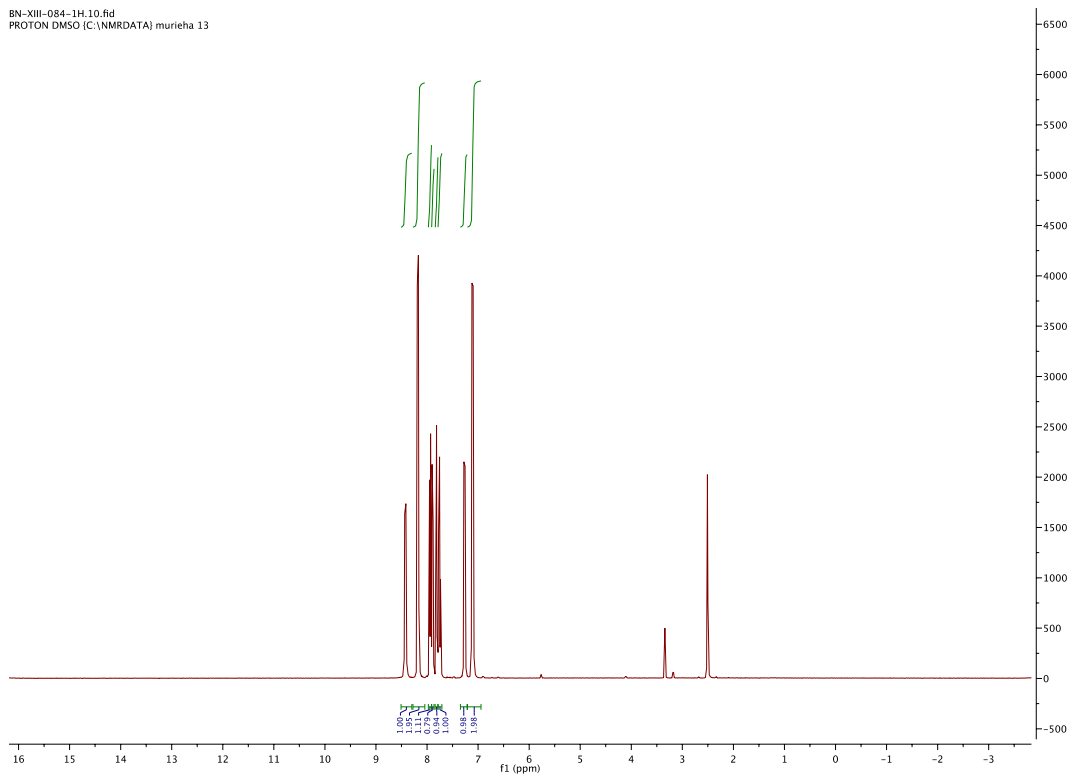

BN-XIII-084-13C.10.fid  
C13CPD DMSO (C:\NMRDATA) murieha 13

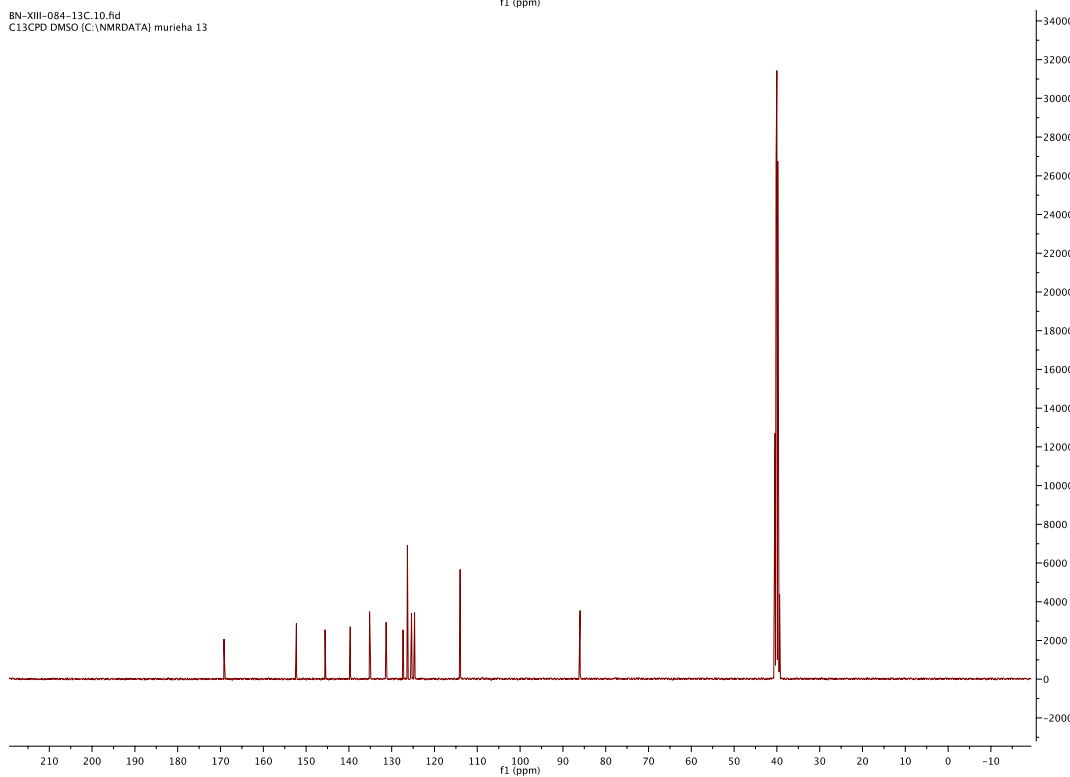



# (±)-3-{[4-(Trifluoromethyl)phenyl]amino}isobenzofuran-1(3H)-one (6e)

BN-XIII-085-1H.10.fid  
PROTON DMSO (C:\NMRDATA) murieha 39

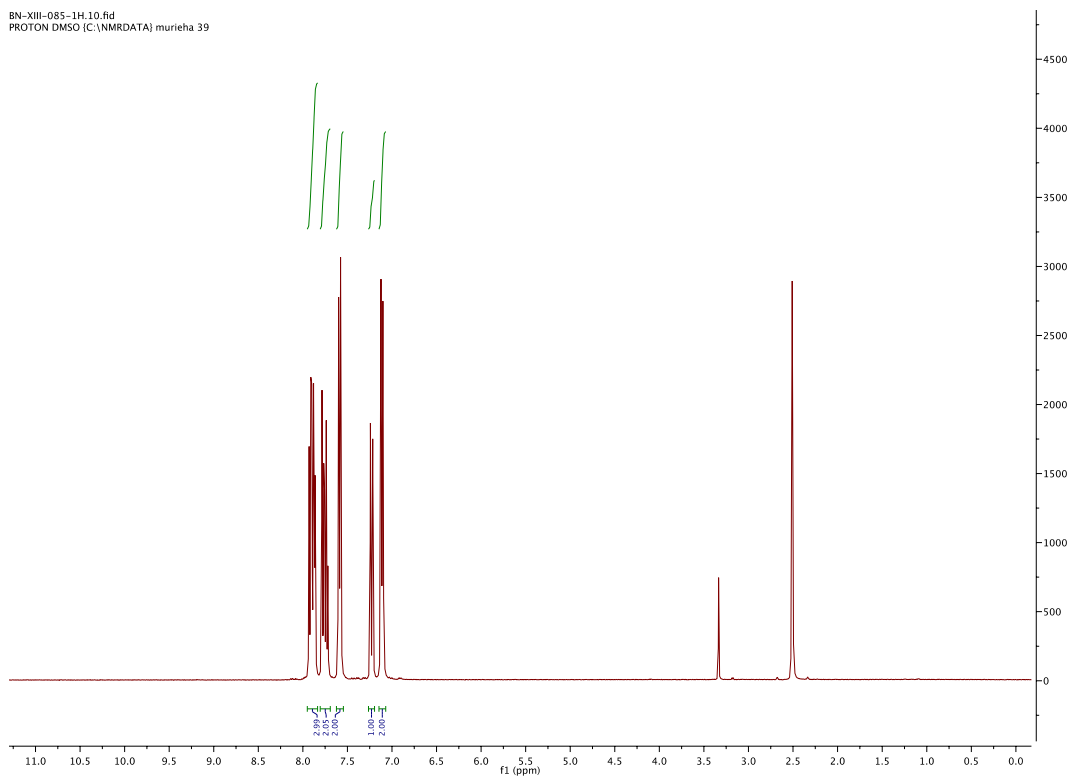

BN-XIII-085-13C.10.fid  
C13CPD DMSO (C:\NMRDATA) murieha 39

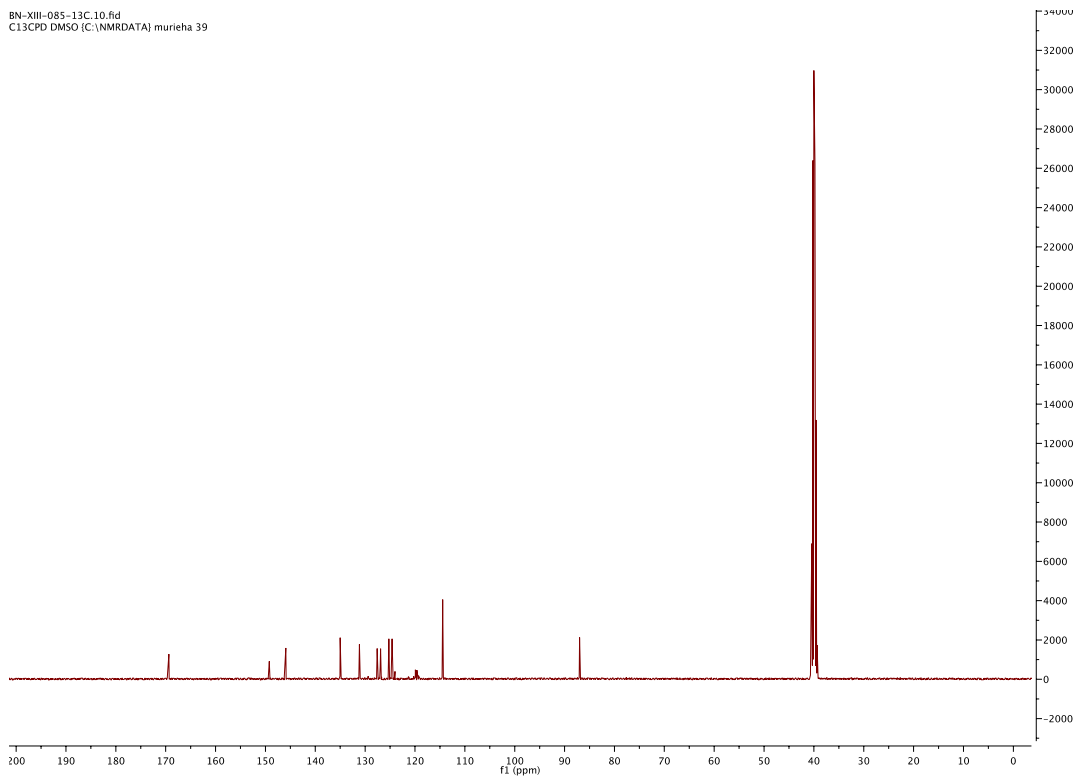

# (±)-2-Benzyl-1-methyl-3-oxoisindoline-1-carbonitrile (8a)

NPBN-1H-CN-SMPLBNZYL-10-29-14.10.fid  
PROTON DMSO [C:\NMRDATA] muddala 35

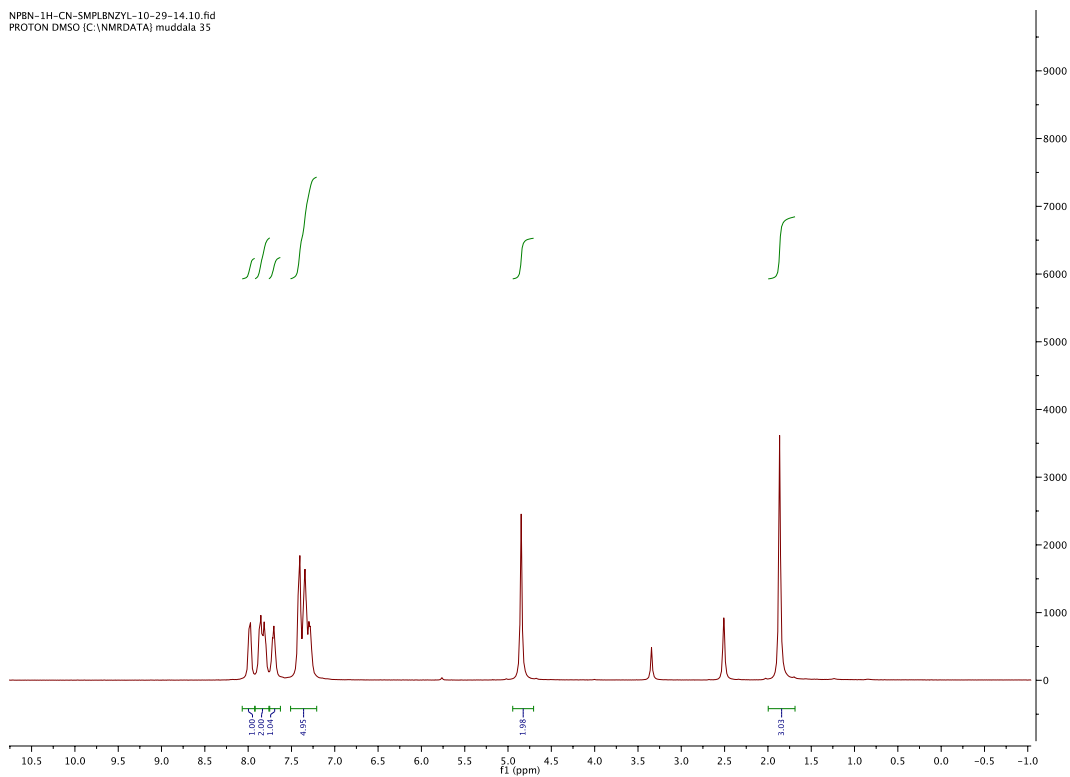

NPBN-13C-CN-SMPLBNZYL-10-29-14.10.fid  
C13CPD DMSO [C:\NMRDATA] muddala 35

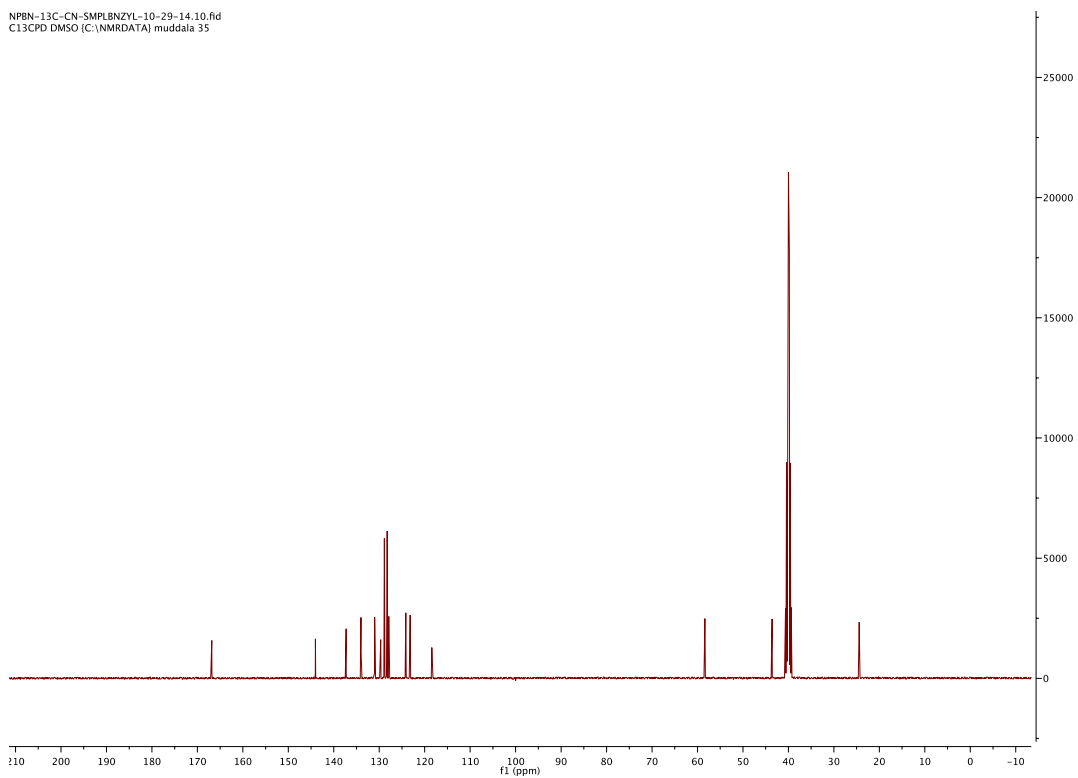

# (±)-2-(4-Chlorobenzyl)-1-methyl-3-oxoisindoline-1-carbonitrile (8b)

NP-1H-Pchlorobenzyl-10-23-14.10.fid  
PROTON DMSO (C:\NMRDATA) muddala 53

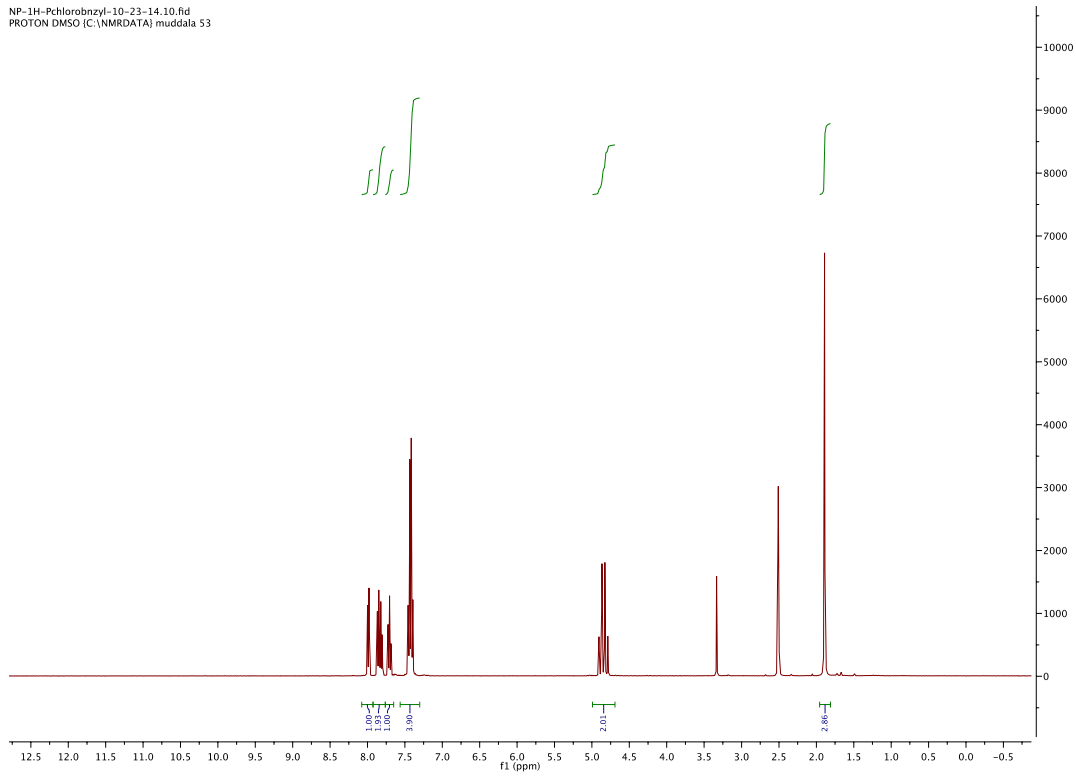

NP-13C-Pchlorobenzyl-10-23-14.10.fid  
C13CPD DMSO (C:\NMRDATA) muddala 53

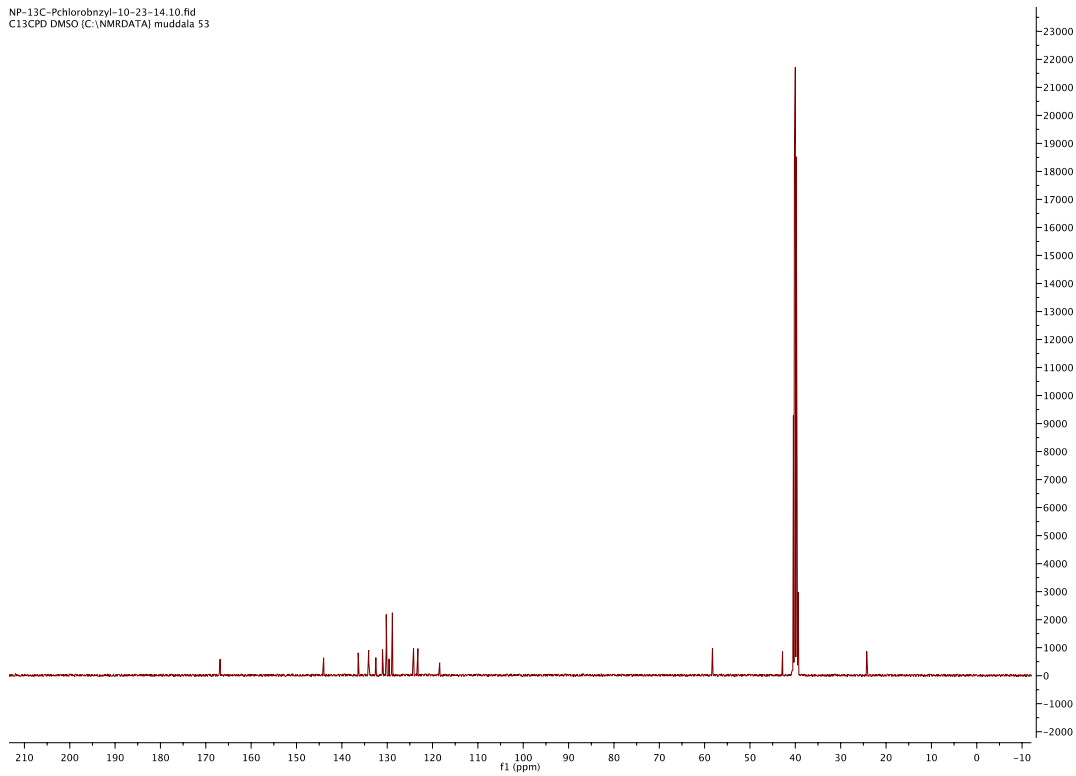

# (±)-2-(4-Fluorobenzyl)-1-methyl-3-oxoisindoline-1-carbonitrile (8c)

NPN-1H-CN-Parafuoro-11-01-14.10.fid  
PROTON CDCI3 (C:\NMRDATA) muddala 50

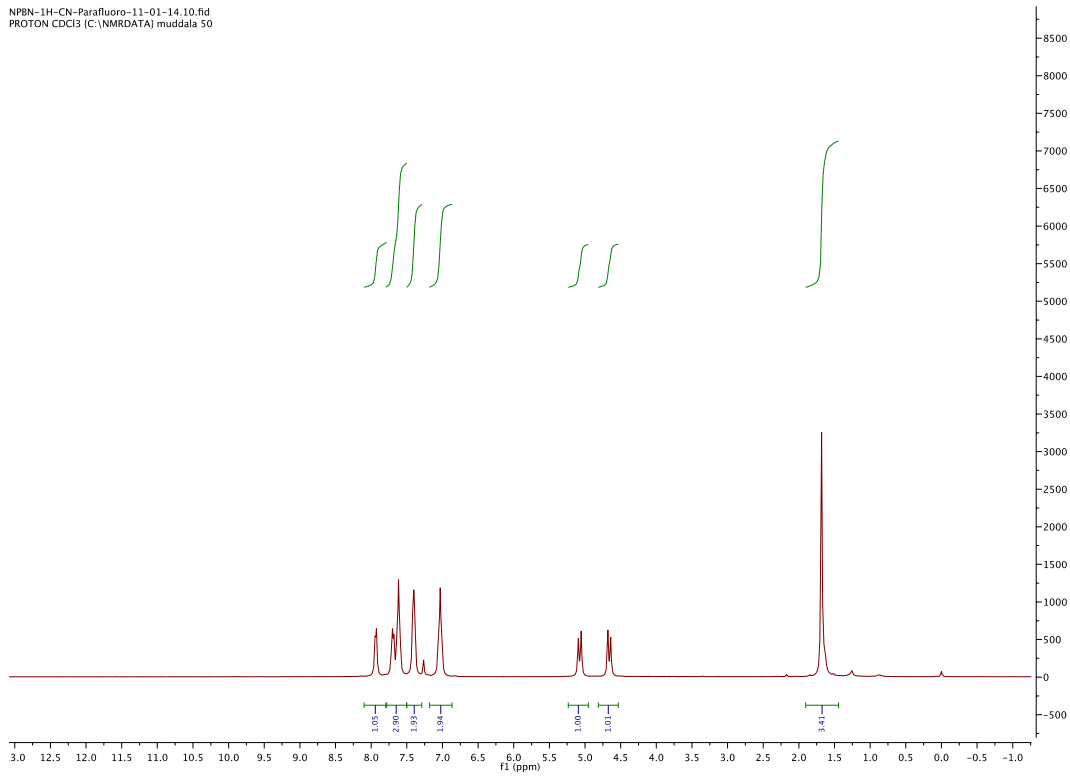

NPN-13C-CN-Parafuoro-11-01-14.10.fid  
C13CPD CDCI3 (C:\NMRDATA) muddala 50

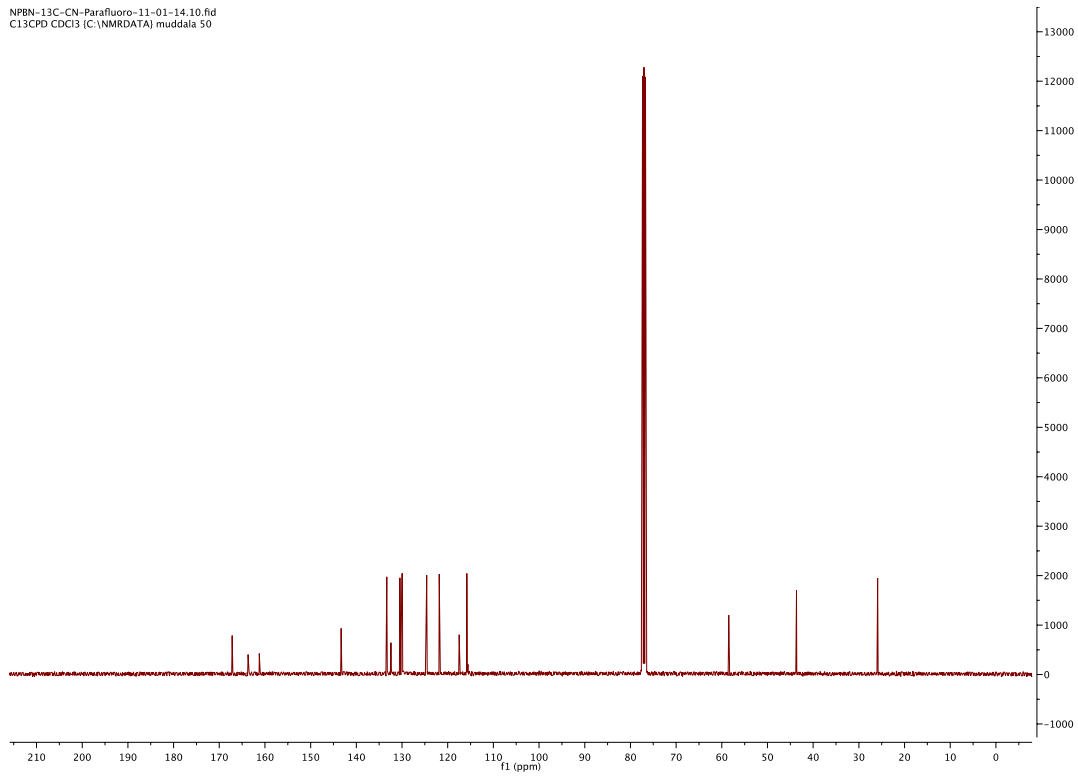

# (±)-1-Methyl-2-(4-methylbenzyl)-3-oxoisindoline-1-carbonitrile (8d)

NPBN-1H-CN-Phenethyl-10-29-14.10.fid  
PROTON DMSO [C:\NMRDATA] muddala 34

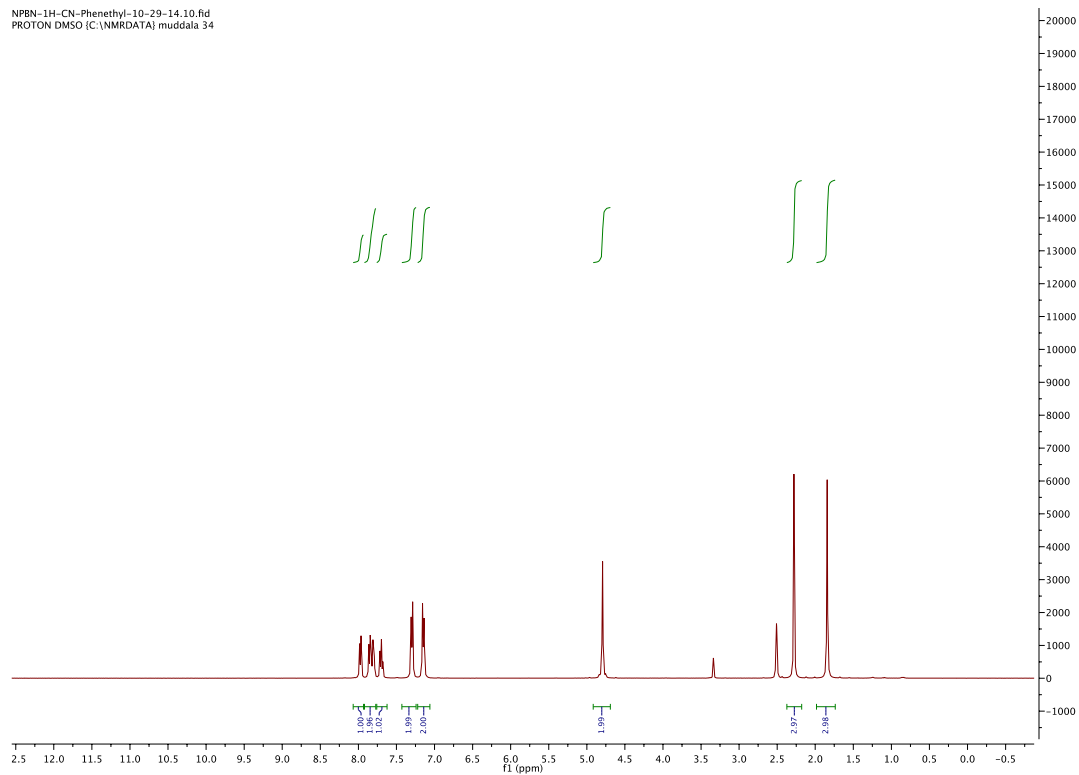

NPBN-13C-CN-Phenethyl-10-29-14.10.fid  
C13CPD DMSO [C:\NMRDATA] muddala 34

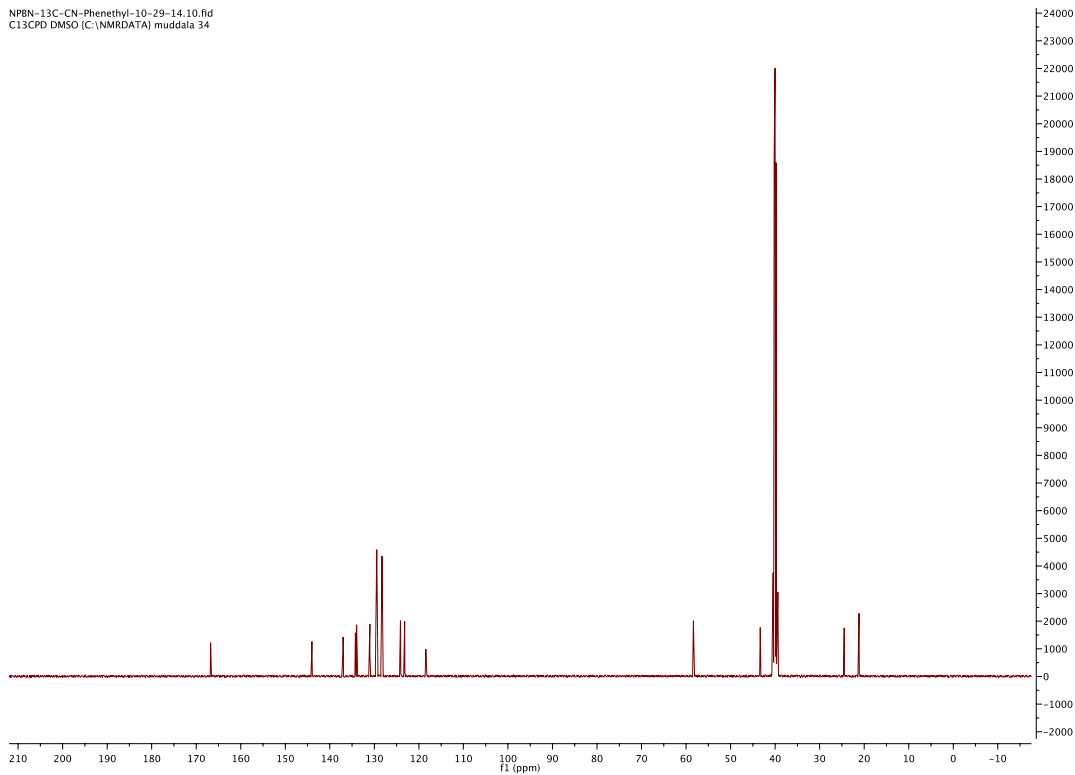

# (±)-2-Allyl-1-methyl-3-oxoisindoline-1-carbonitrile (8e)

NPN-1H-CN-allyl-2-11-02-14.10.fid  
PROTON DMSO [C:\NMRDATA] muddala 47

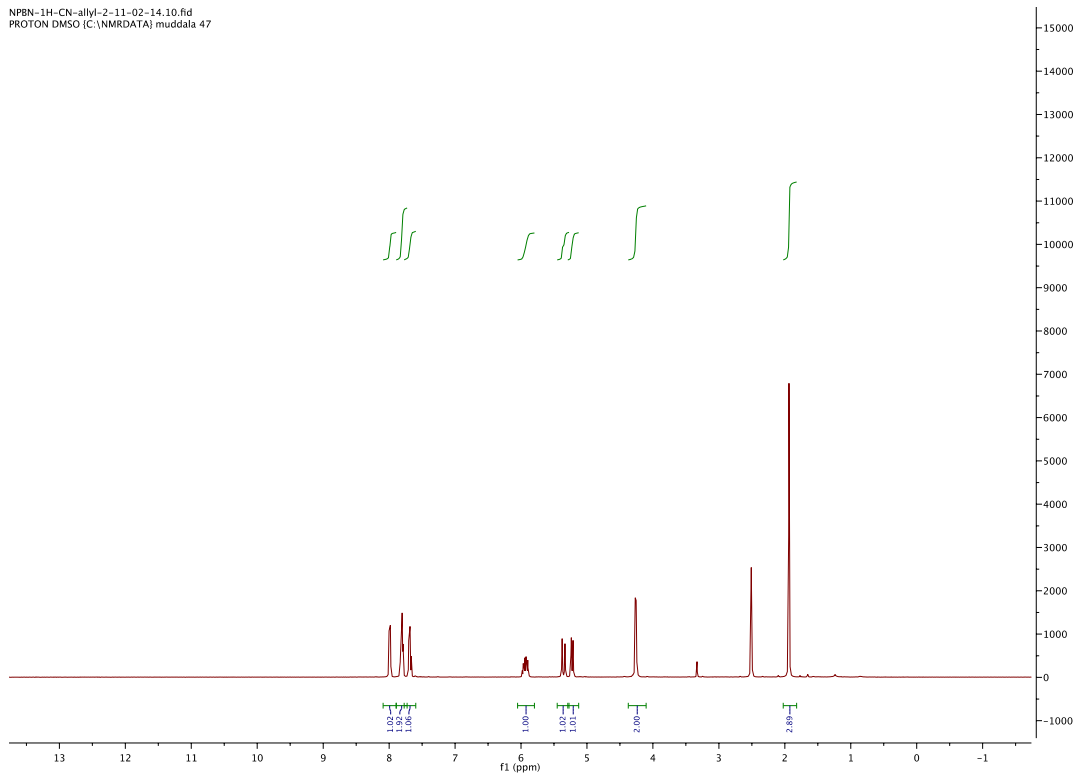

NPN-13C-CN-allyl-11-01-14.10.fid  
C13CPD CDCl3 [C:\NMRDATA] muddala 54

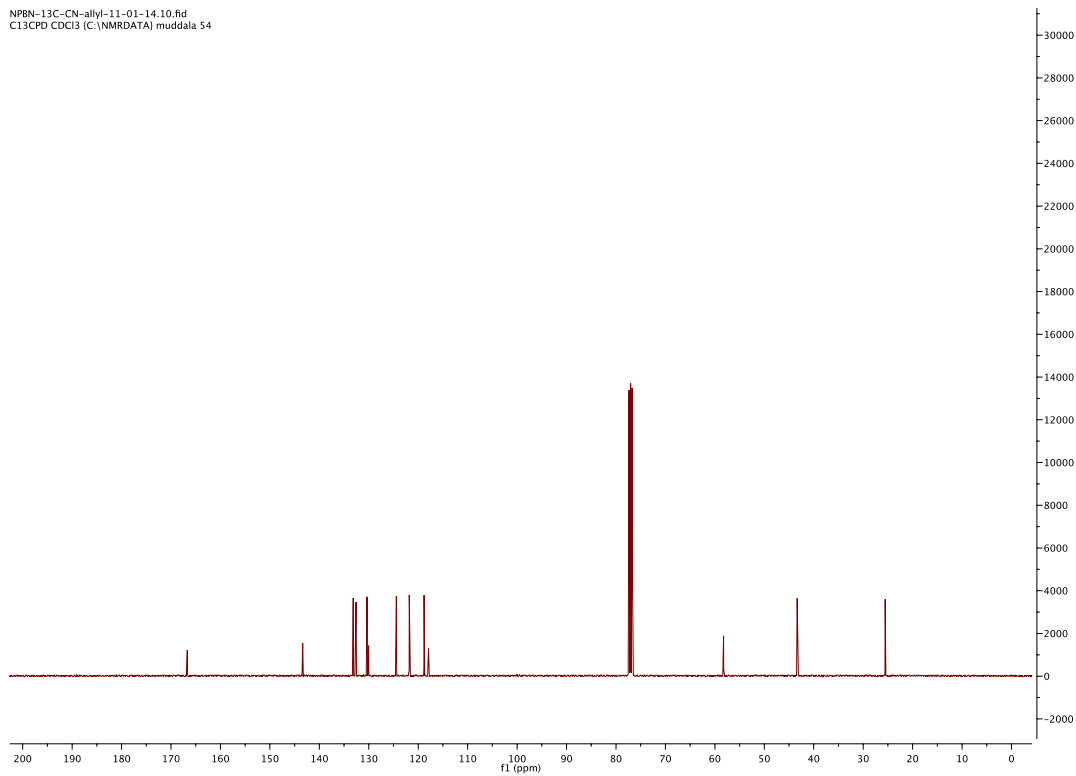

# (±)-2-Cyclopropyl-1-methyl-3-oxoisindoline-1-carbonitrile (8f)

NPN-CN-Cyclopropyl-10-28-14.10.fid  
PROTON DMSO (C:\NMRDATA) muddala 26

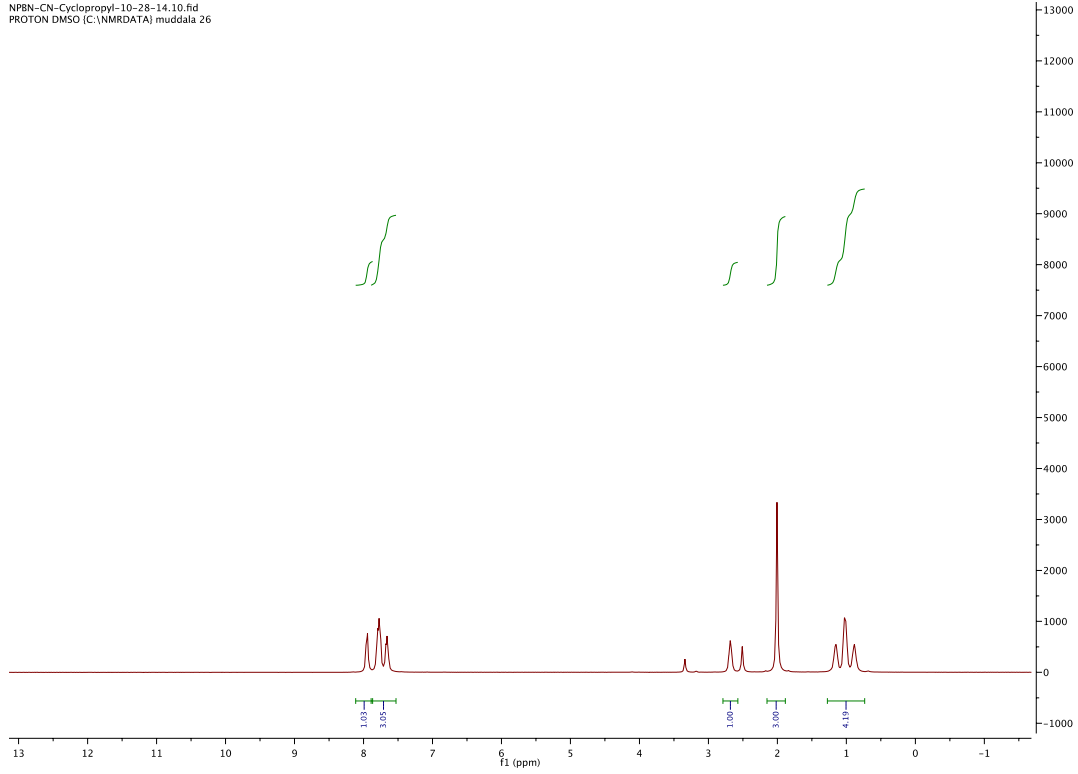

NPN-13C-CN-Cyclopropyl-10-28-14.10.fid  
C13CPD DMSO (C:\NMRDATA) muddala 26

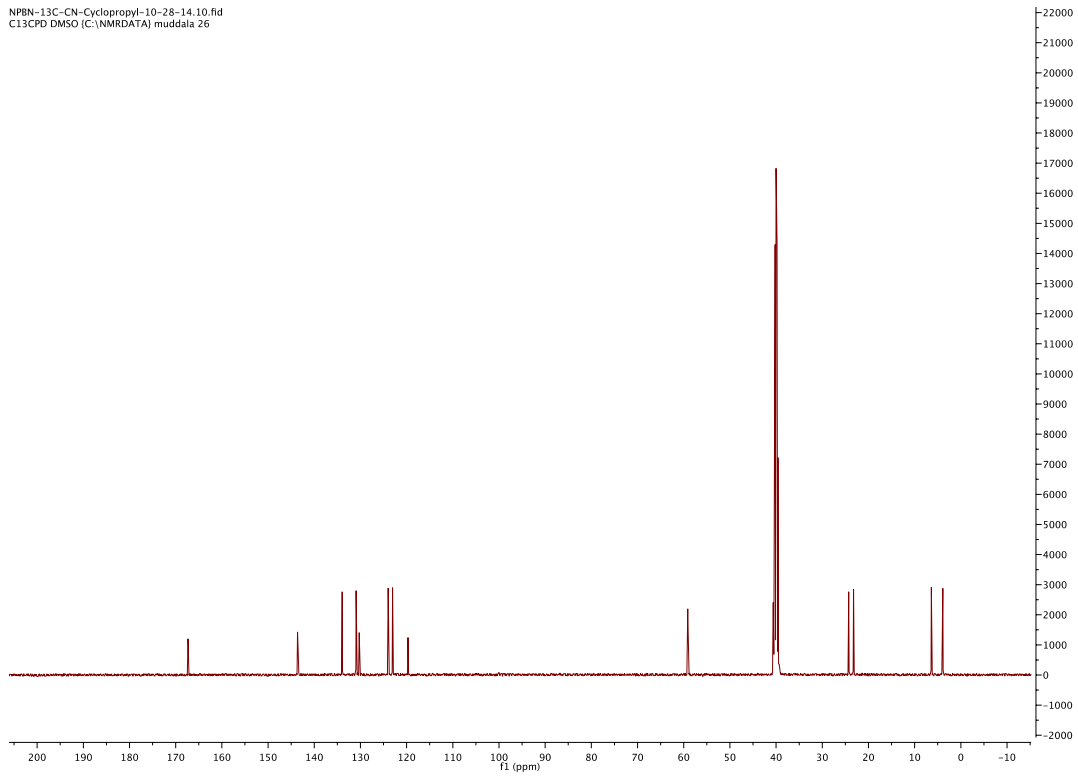

# (±)-2-Benzyl-1-methyl-3-oxoisindoline-1-carboxamide (9a)

NPN-1H-SIMPLEBNZYL-10-25-14.10.fid  
PROTON DMSO [C:\NMRDATA] muddala 38

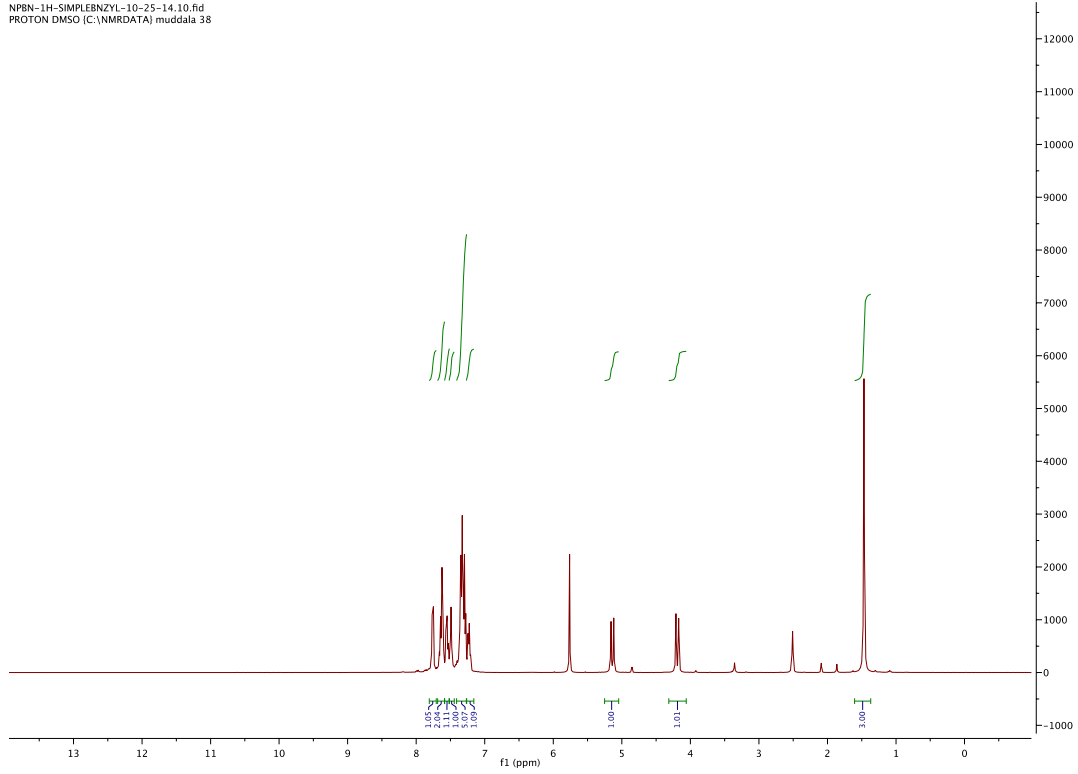

NPN-13C-SIMPLEBNZYL-10-25-14.10.fid  
C13CPD DMSO [C:\NMRDATA] muddala 38

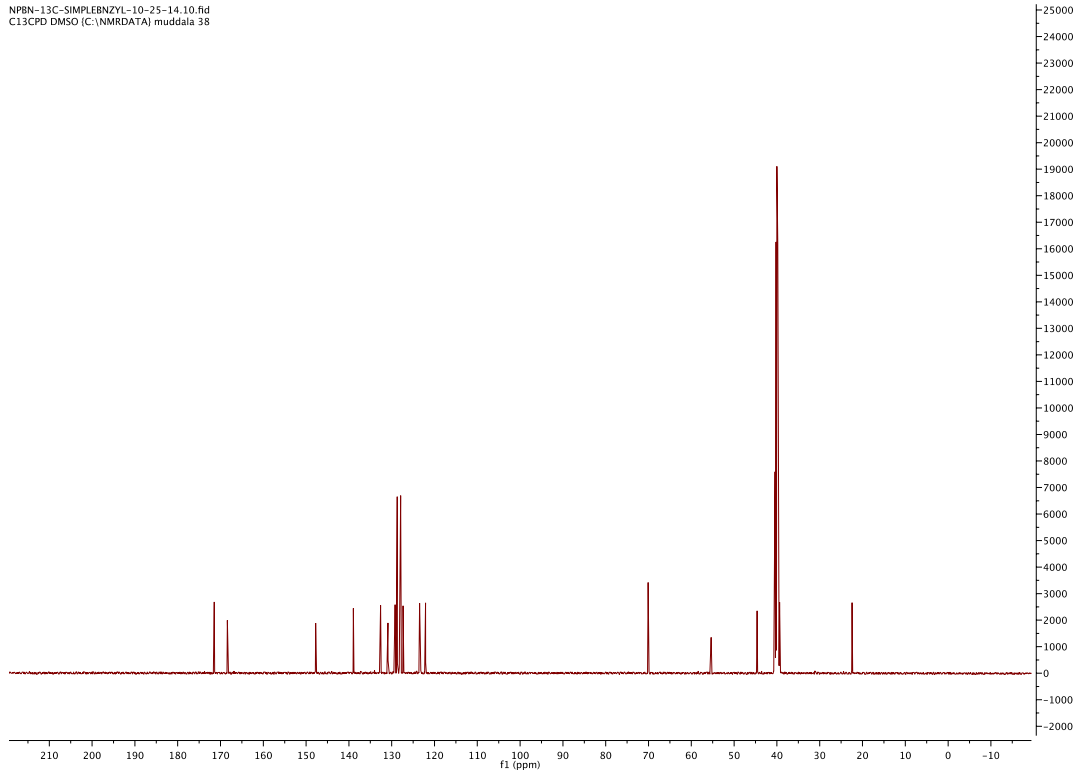



# (±)-2-(4-Chlorobenzyl)-1-methyl-3-oxoisindoline-1-carboxamide (9b)

NPN-1H-R\_Methylbenzyl-10-26-14.10.fid  
PROTON DMSO (C:\NMRDATA) muddala 8

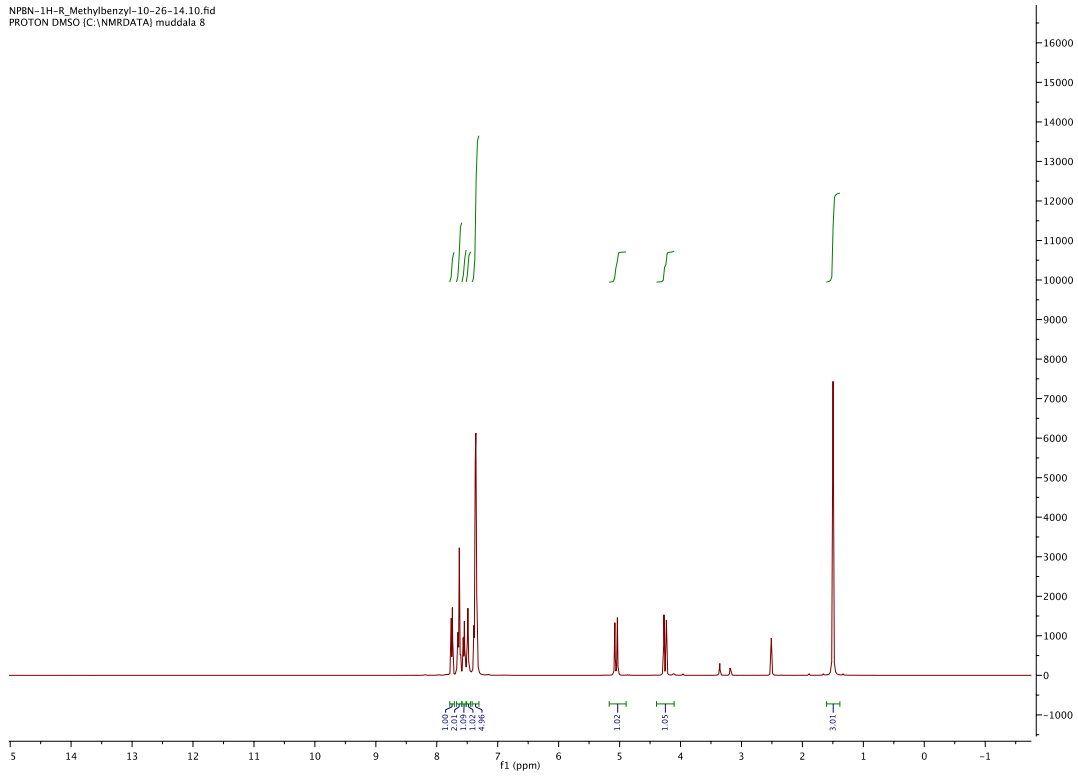

NPN-13C-R\_Methylbenzyl-10-26-14.10.fid  
C13CPD DMSO (C:\NMRDATA) muddala 8

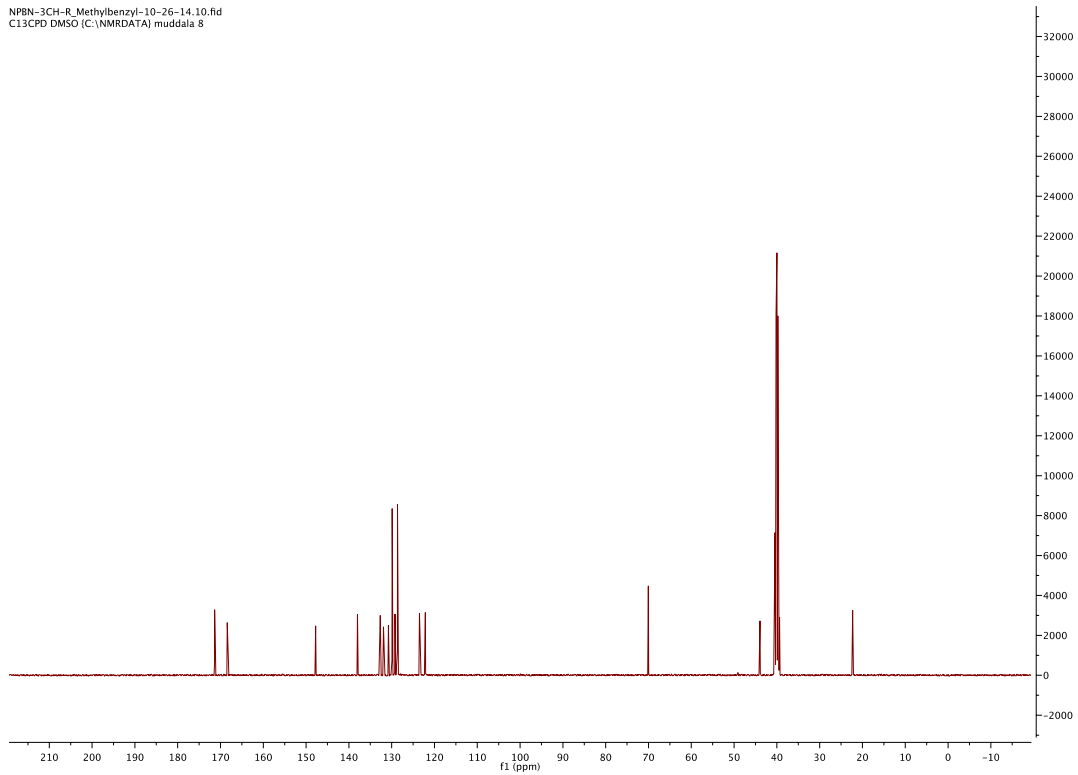

# (±)-2-(4-Fluorobenzyl)-1-methyl-3-oxoisindoline-1-carboxamide (9c)

NPN-1H-PFBZYL-10-21-14.10.fid  
PROTON DMSO (C:\NMRDATA) muddala 53

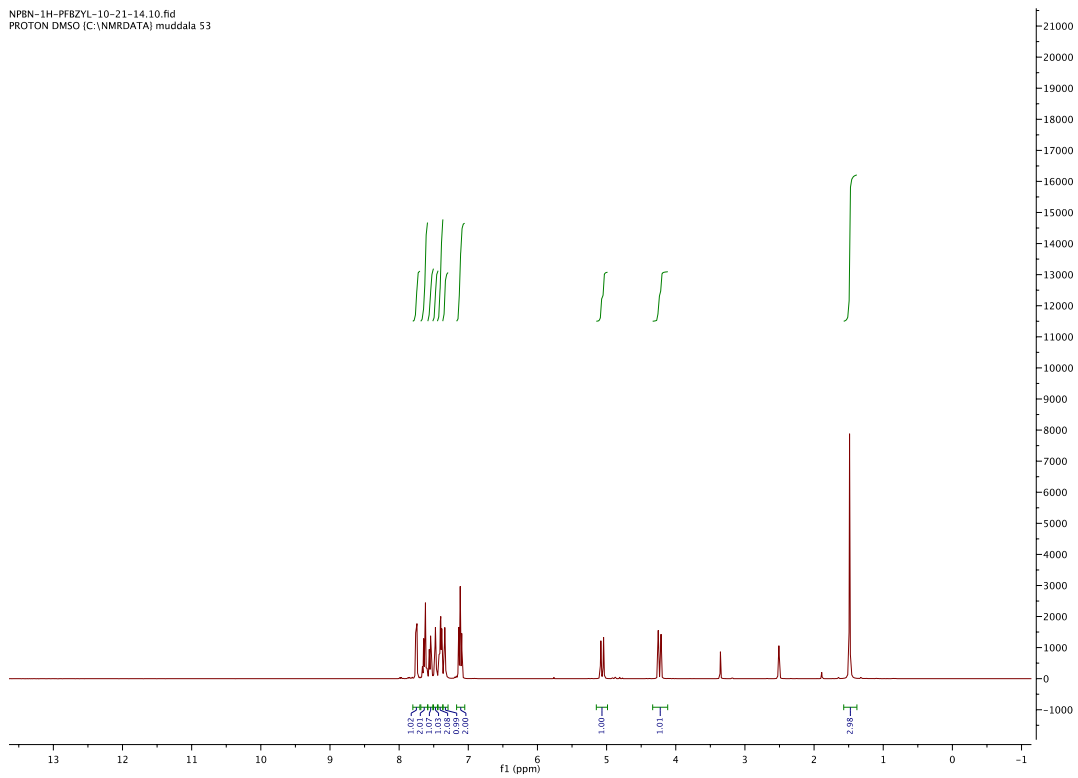

NPN-13C-PFBZYL-10-21-14.10.fid  
C13CPD DMSO (C:\NMRDATA) muddala 53

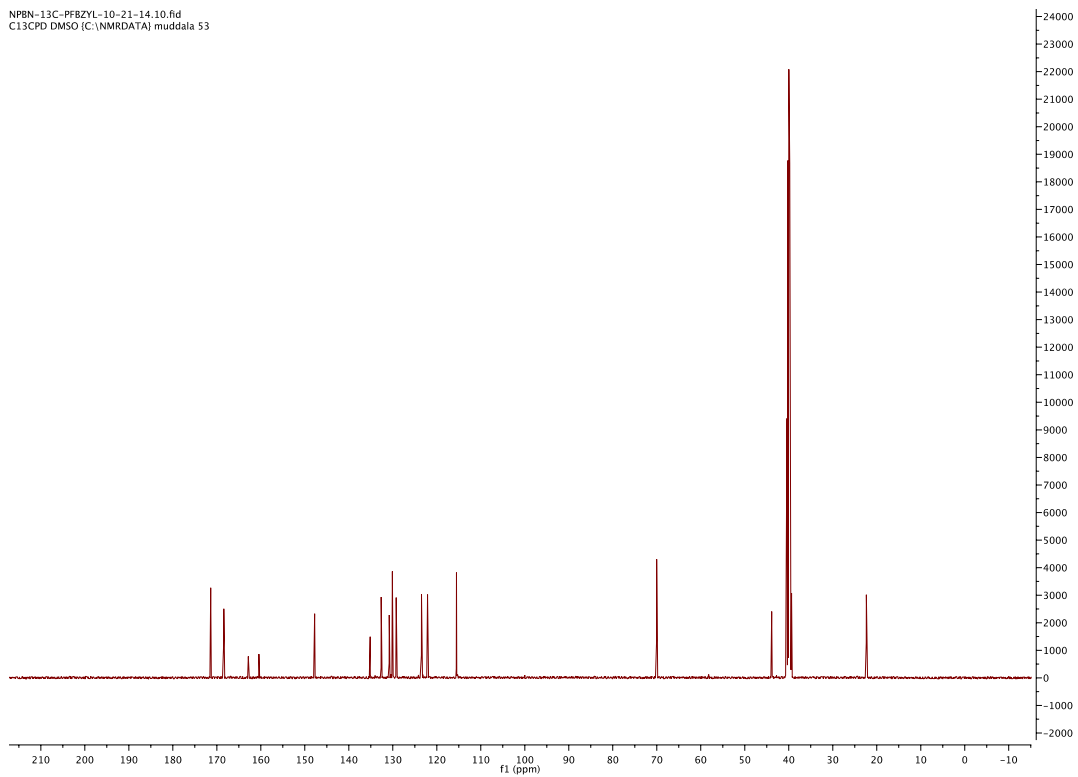

# (±)-2-(3-Methoxybenzyl)-1-methyl-3-oxoisindoline-1-carboxamide (9d)

NPN-1H-OMETHOXY-10-21-14.10.fid  
PROTON DMSO [C:\NMRDATA] muddala 41

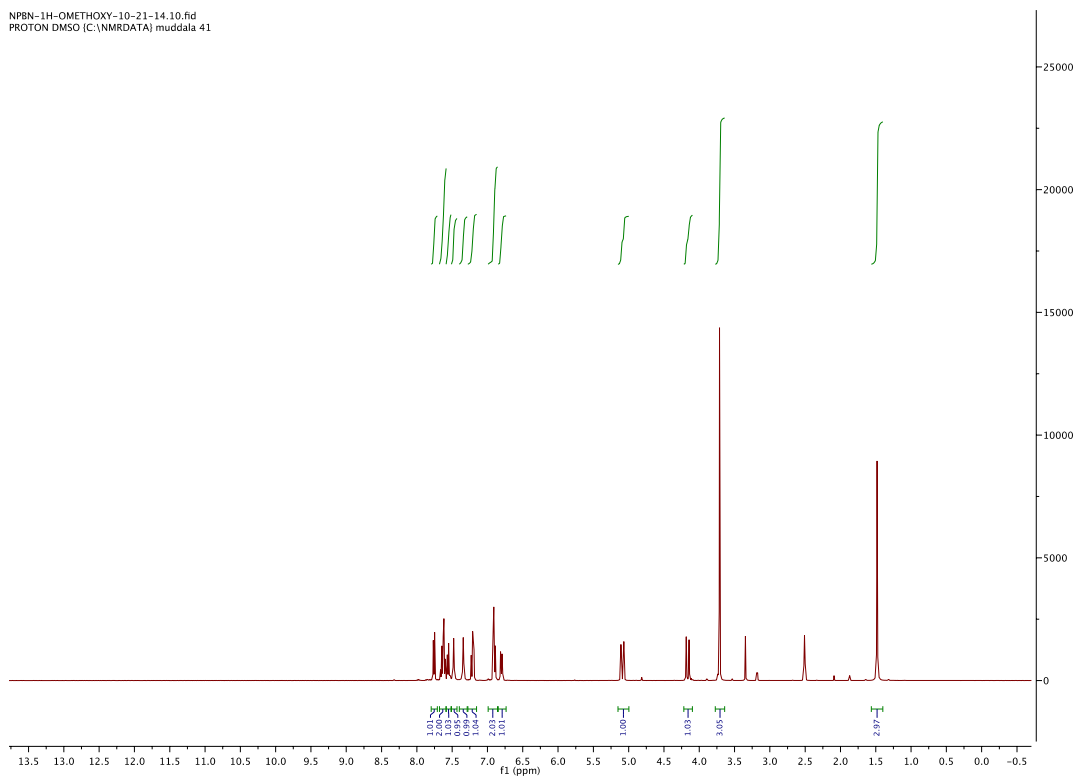

NPN-13C-OMETHOXY-10-21-14.10.fid  
C13CPD DMSO [C:\NMRDATA] muddala 41

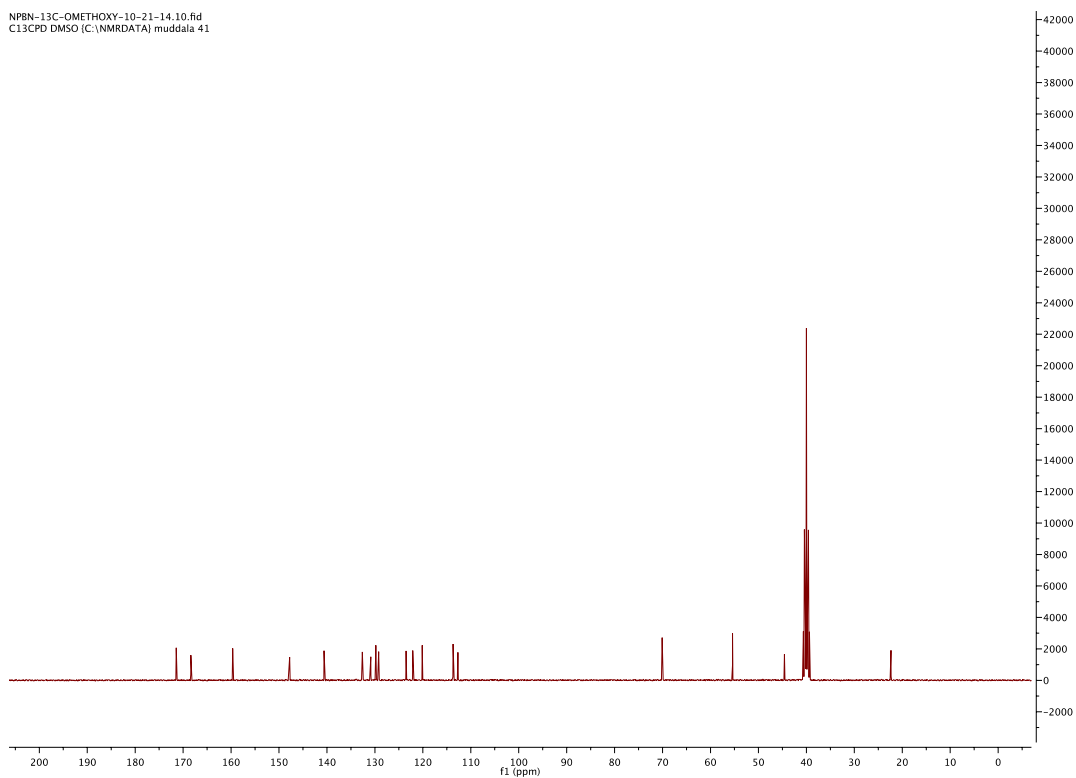

# (±)-2-(4-Methoxybenzyl)-1-methyl-3-oxoisindoline-1-carboxamide (9e)

NPN-1H-Paramethoxy-10-28-14.10.fid  
PROTON DMSO (C:\NMRDATA) muddala 23

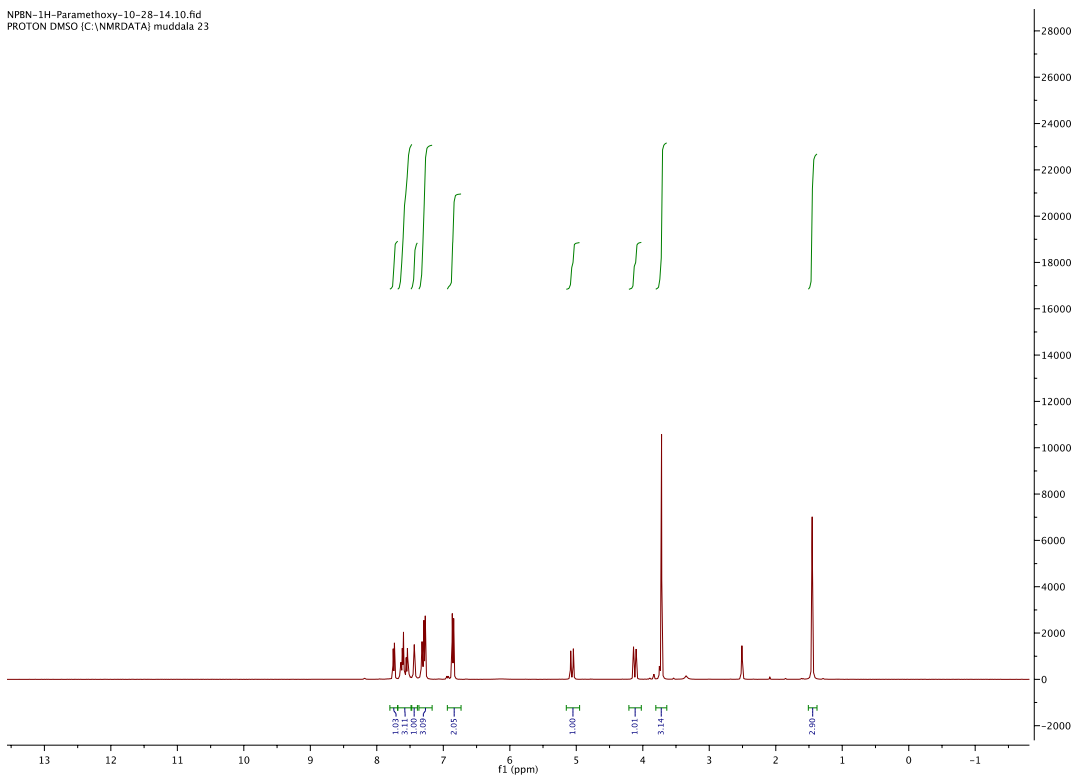

NPN-13C-Paramethoxy-10-28-14.10.fid  
C13CPD DMSO (C:\NMRDATA) muddala 23

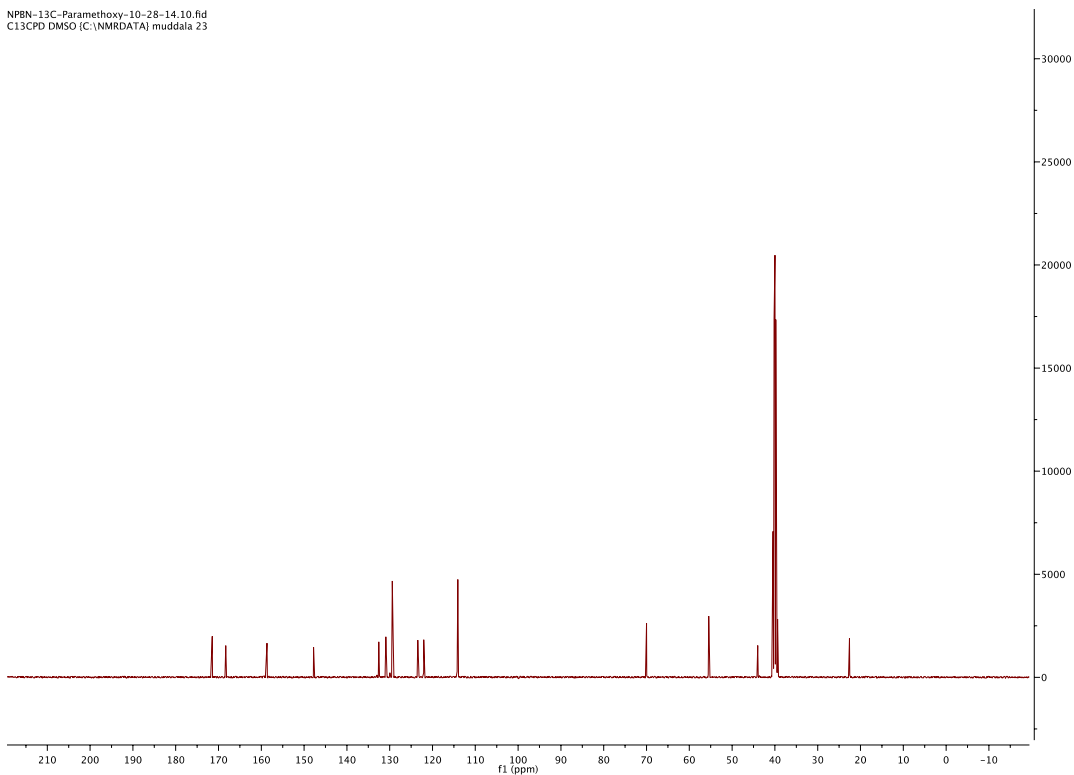

# (±)-1-Methyl-3-oxo-2-[4-(trifluoromethyl)benzyl]isoindoline-1-carboxamide (9f)

NPN-TFMB-10-17-14.10.fid  
PROTON DMSO [C:\NMRDATA] muddala 13

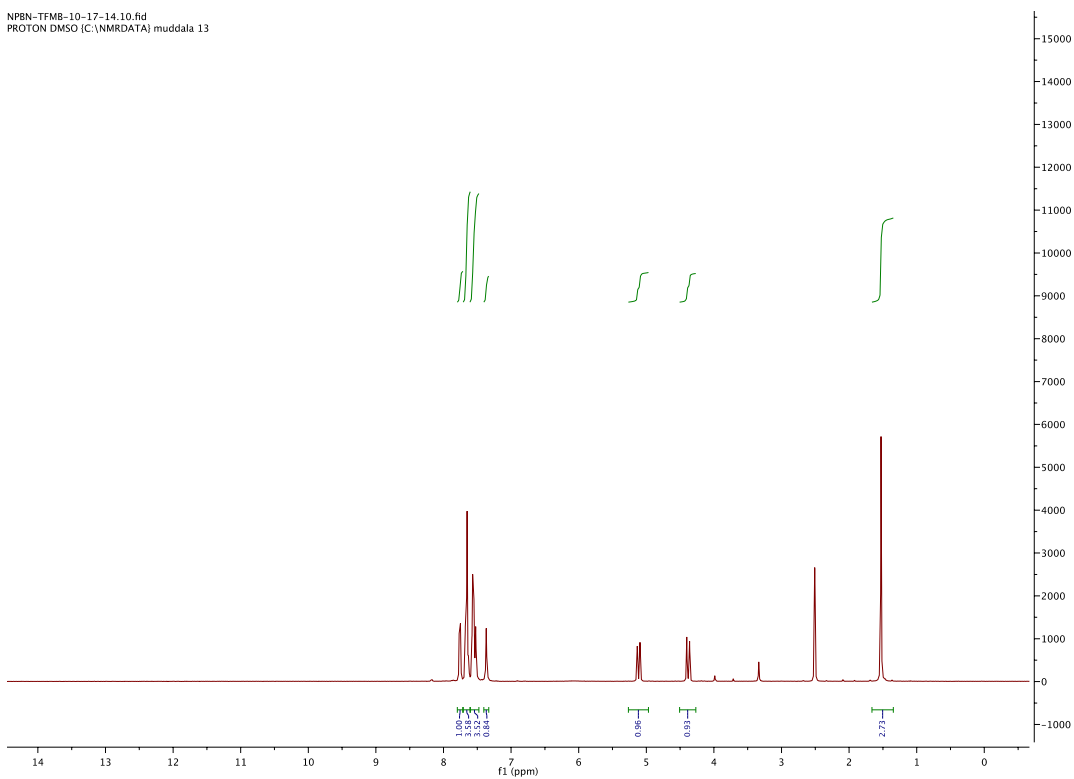

NPN-13C-TFMB-II-10-17-14.10.fid  
C13CPD DMSO [C:\NMRDATA] muddala 2

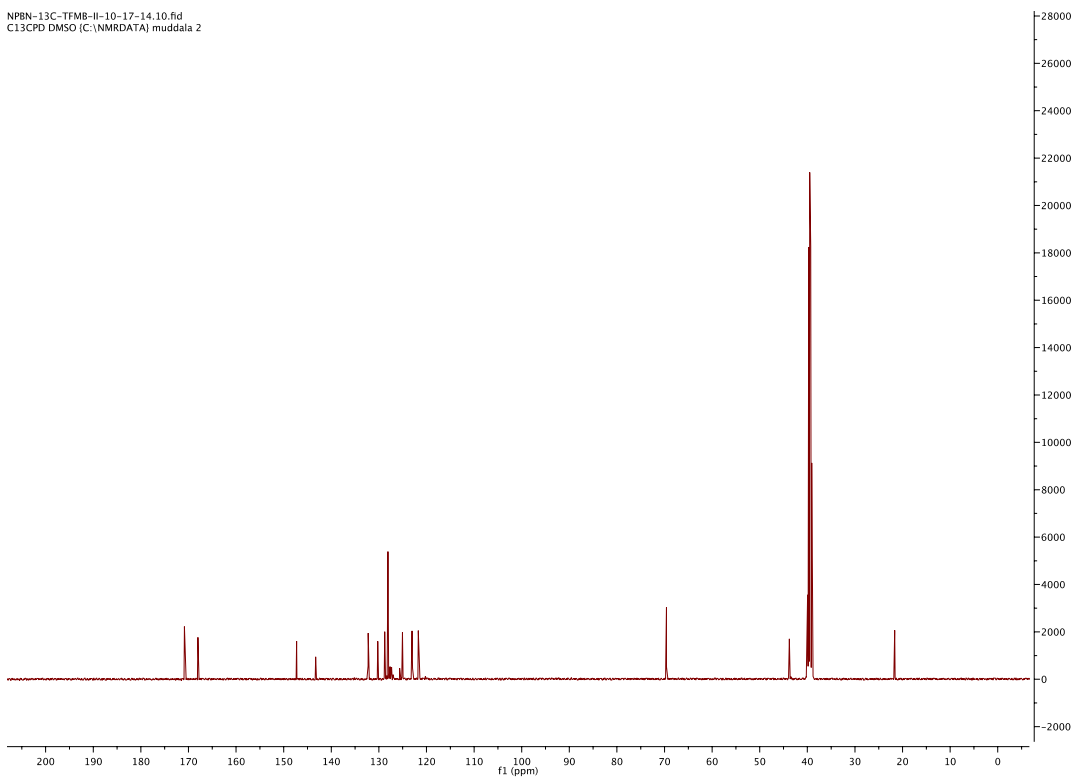

# (±)-1-Methyl-3-oxo-2-phenethylisoindoline-1-carboxamide (9g)

NPBN-1H-BNZYL-10-21-14.10.fid  
PROTON DMSO (C:\NMRDATA) muddala 52

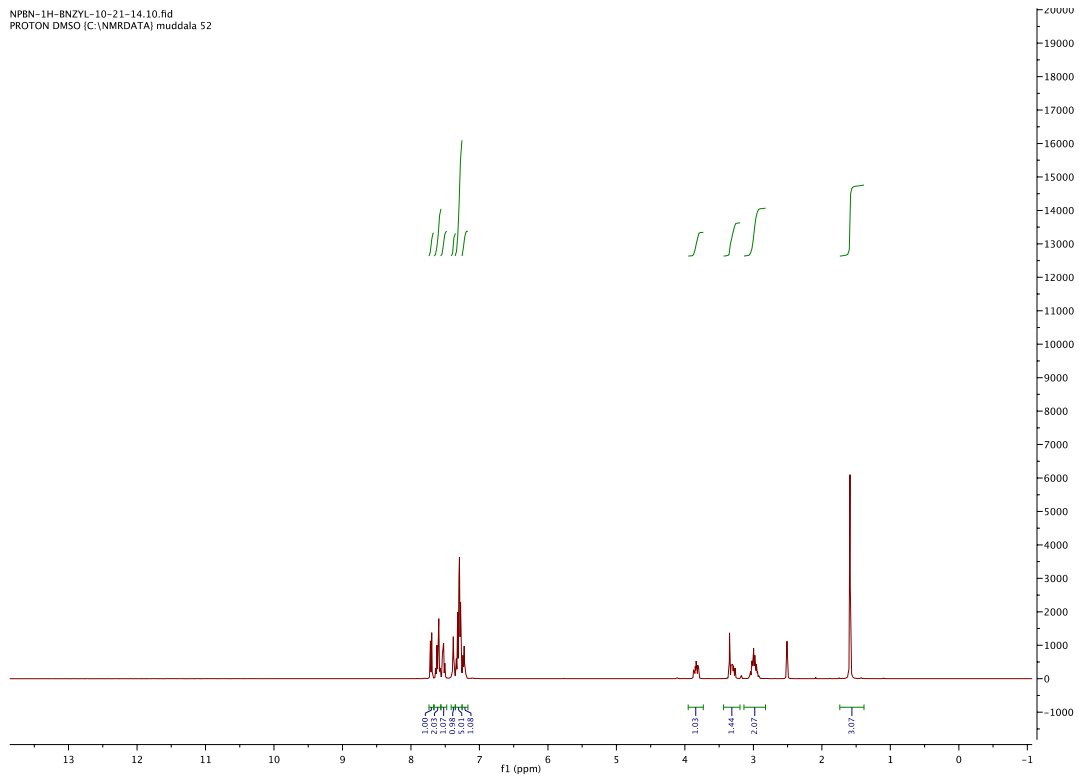

NPBN-13C-BNZYL-10-21-14.10.fid  
C13CPD DMSO (C:\NMRDATA) muddala 52

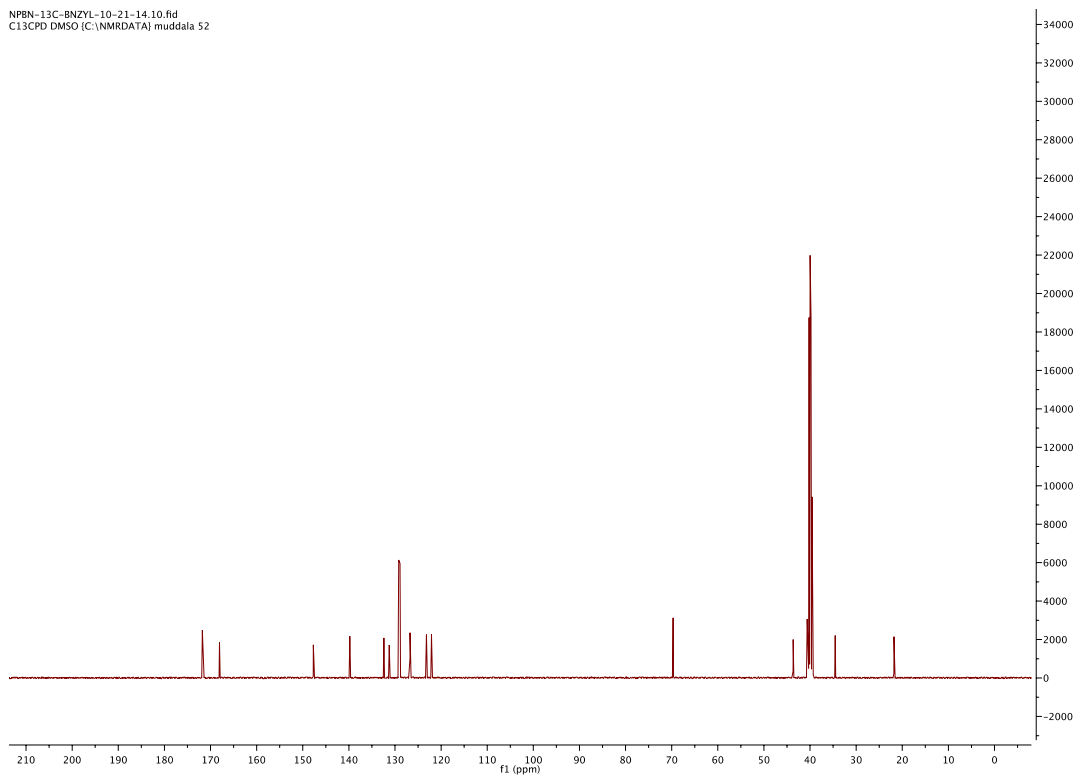

# (±)-2-Allyl-1-methyl-3-oxoisindoline-1-carboxamide (9h)

NPN-1H-ALLYL-10-21-14.10.fid  
PROTON DMSO (C:\NMRDATA) muddala 50

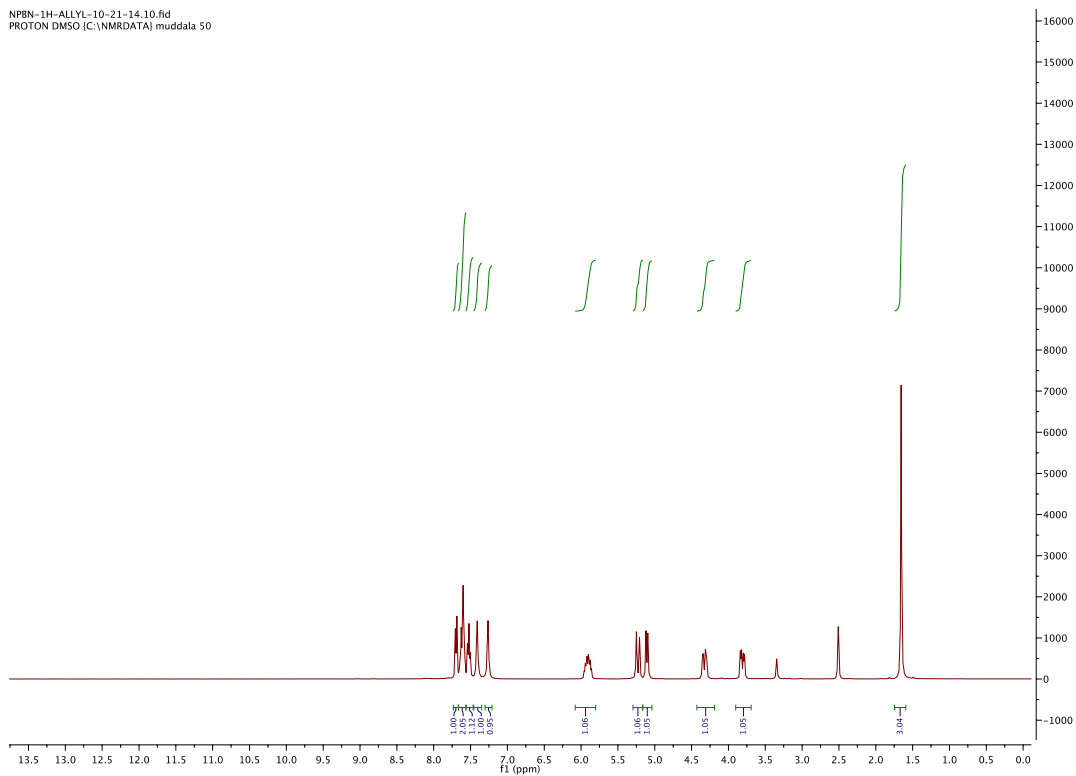

NPN-13C-ALLYL-10-21-14.10.fid  
C13CPD DMSO (C:\NMRDATA) muddala 50

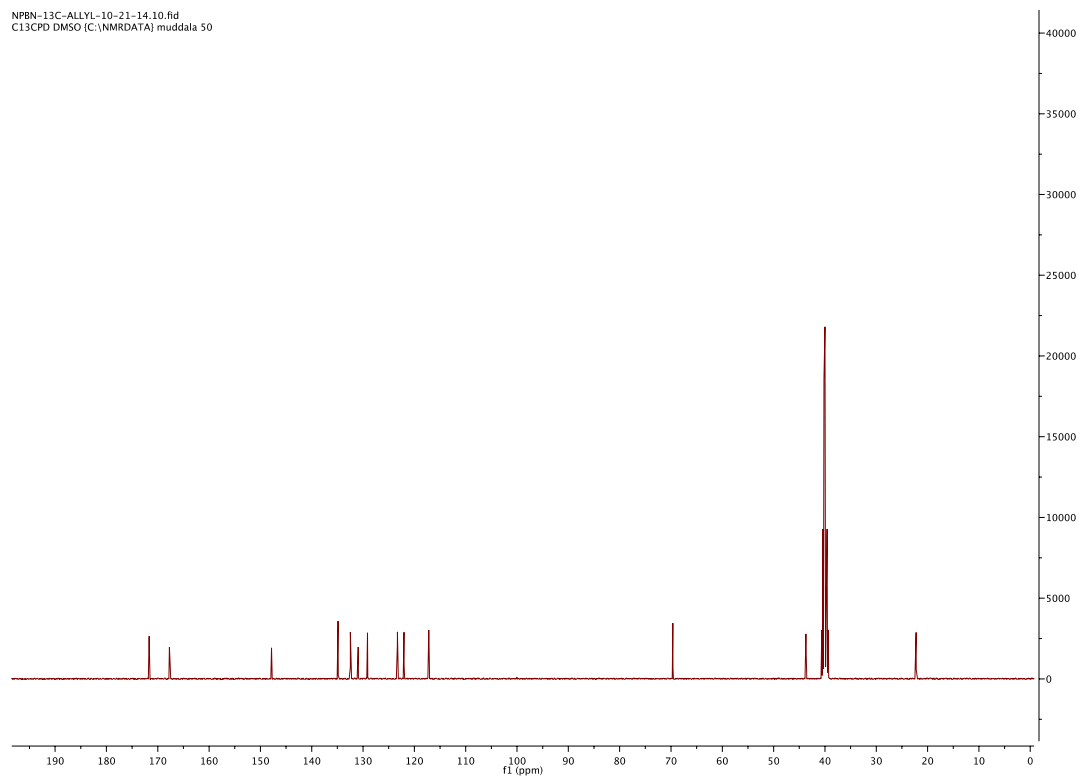

# (±)-2-Cyclopropyl-1-methyl-3-oxoisindoline-1-carboxamide (9i)

NPN-1H-Cycloprop-2-11-02-14.10.fid  
PROTON DMSO (C:\NMRDATA) muddala 6

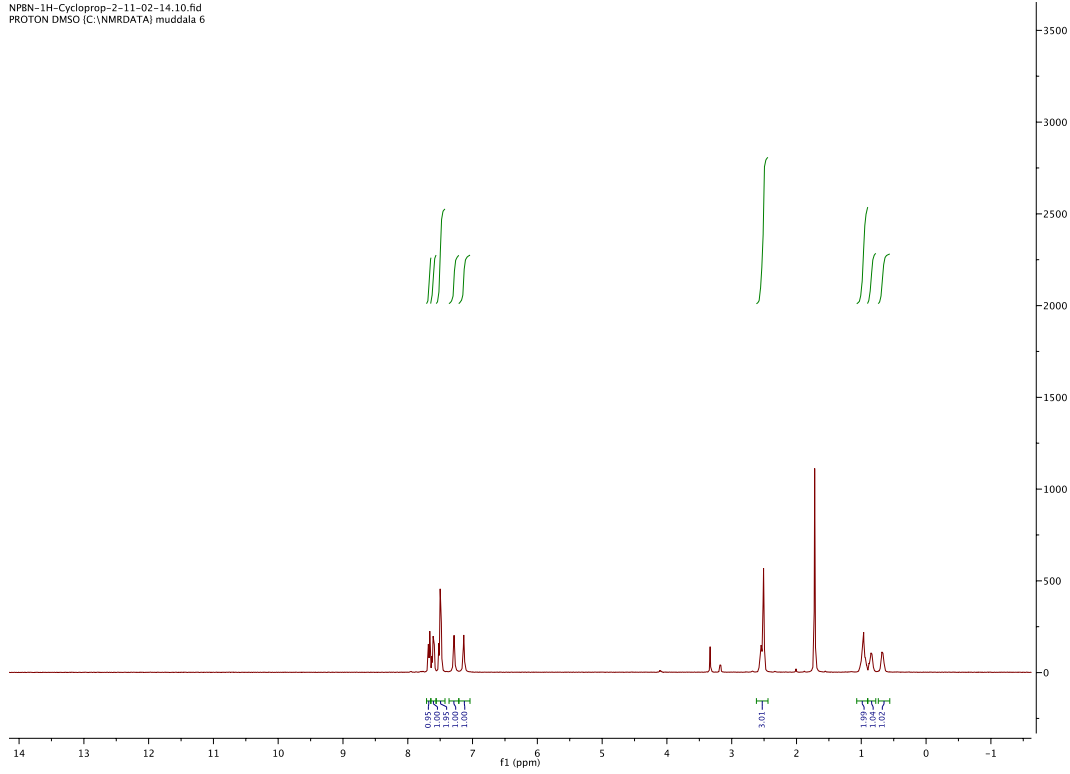

NPN-13C-AMID-Cyclopropyl-10-28-14.10.fid  
C13CPD DMSO (C:\NMRDATA) muddala 27

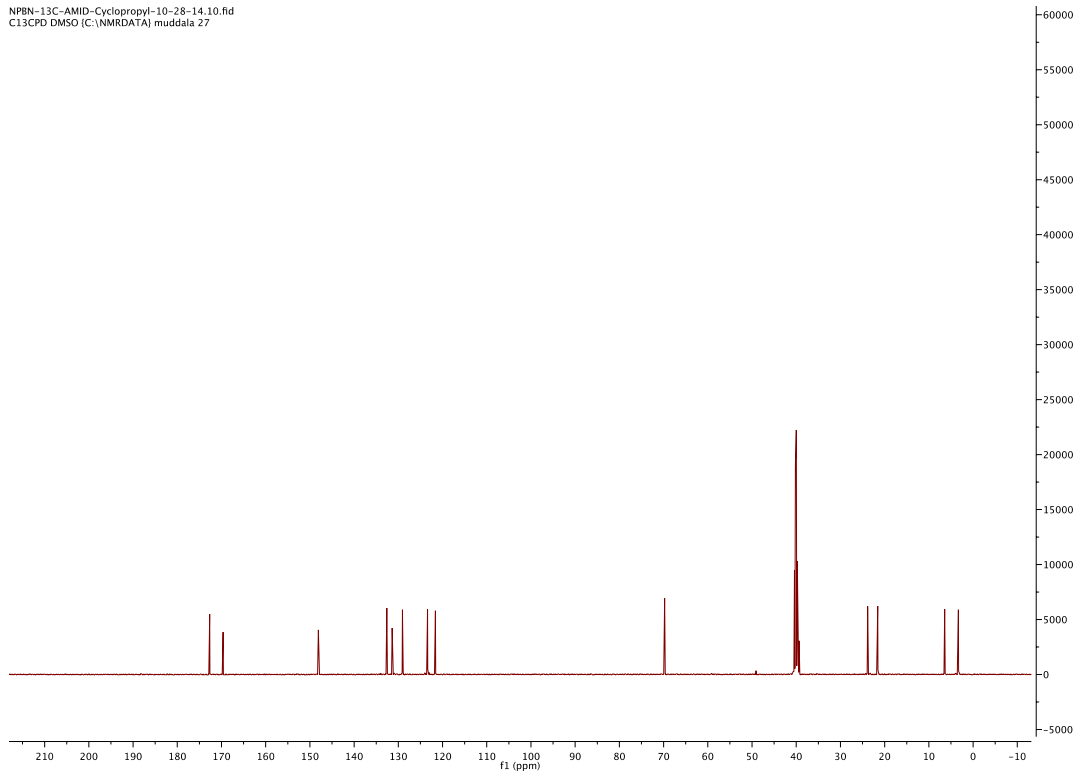



# (±)-2-Ethyl-1-methyl-3-oxoisindoline-1-carboxamide (9j)

NPN-1H-Ethyl-10-21-14.10.fid  
PROTON DMSO [C:\NMRDATA] muddala 44

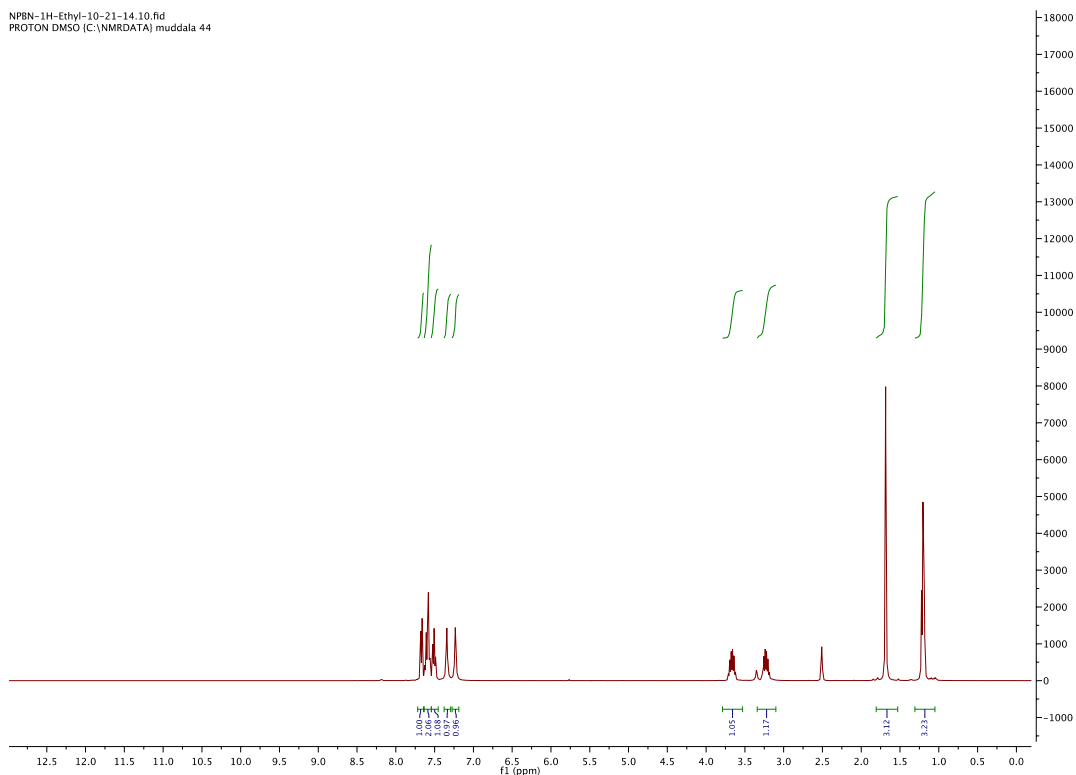

NPN-13C-Ethyl-10-28-14.10.fid  
C13CPD DMSO [C:\NMRDATA] muddala 28

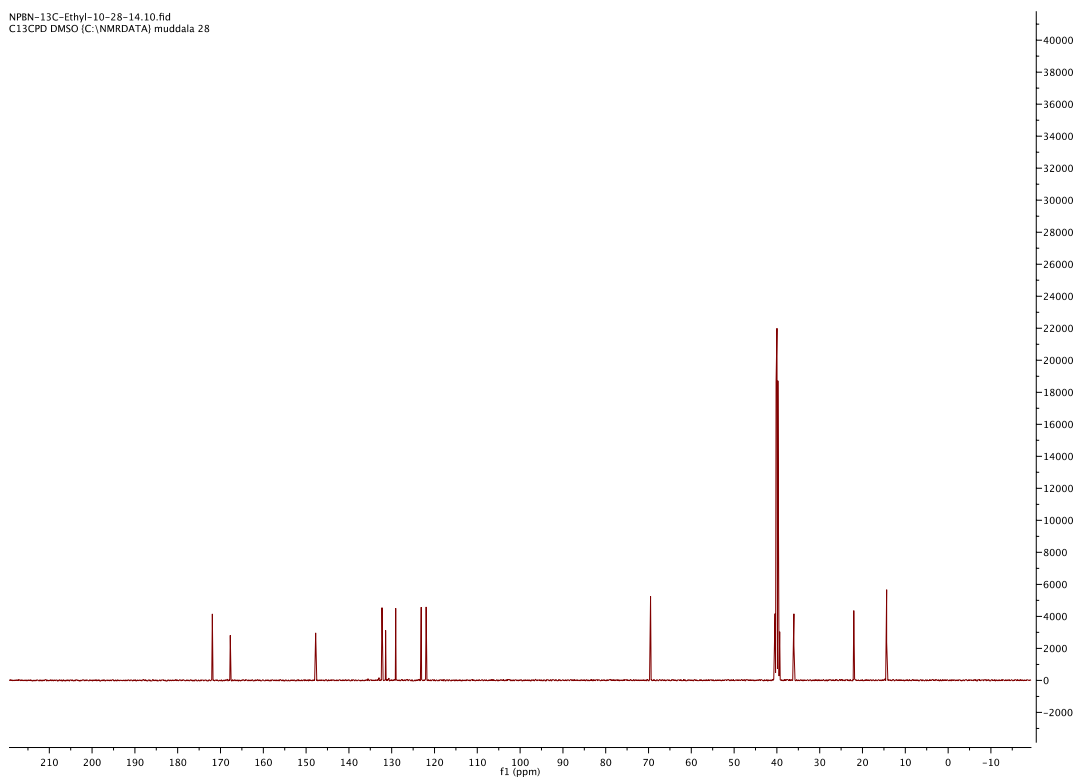

# (±)-1-Methyl-2-(4-methylbenzyl)-3-oxoisindoline-1-carboxamide (9k)

NPB-1H-Tolyl-10-28-14.10.fid  
PROTON DMSO (C:\NMRDATA) muddala 24

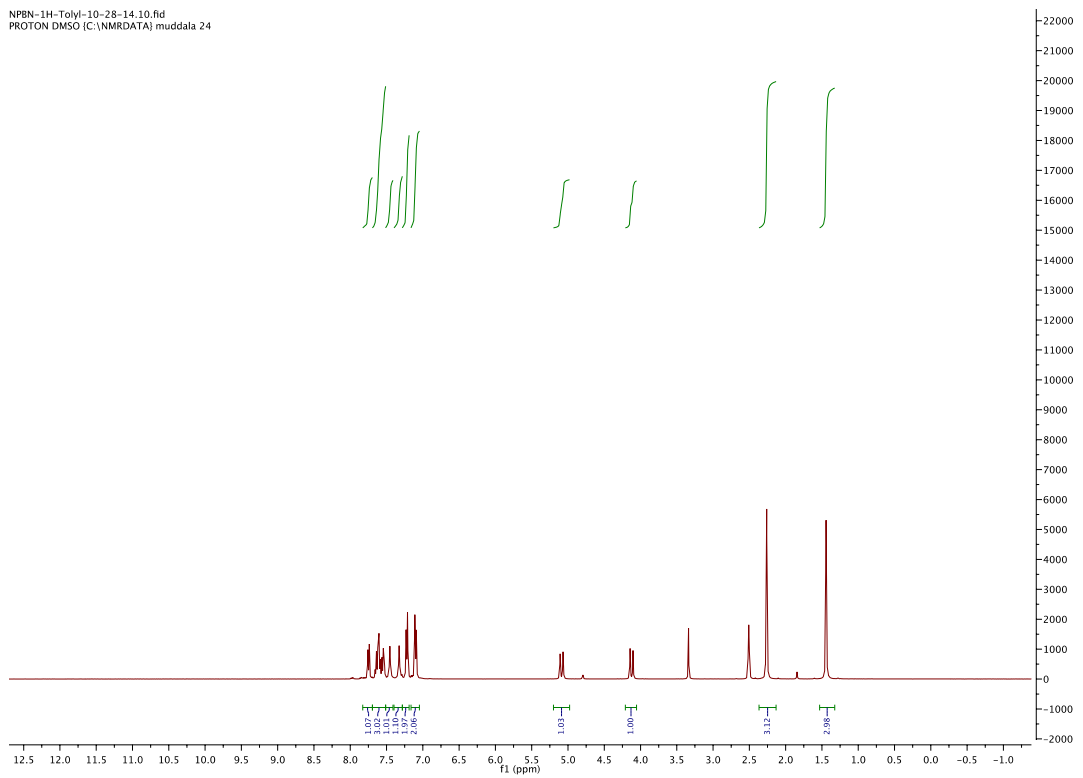

NPB-13C-Tolyl-10-28-14.10.fid  
C13CPD DMSO (C:\NMRDATA) muddala 24

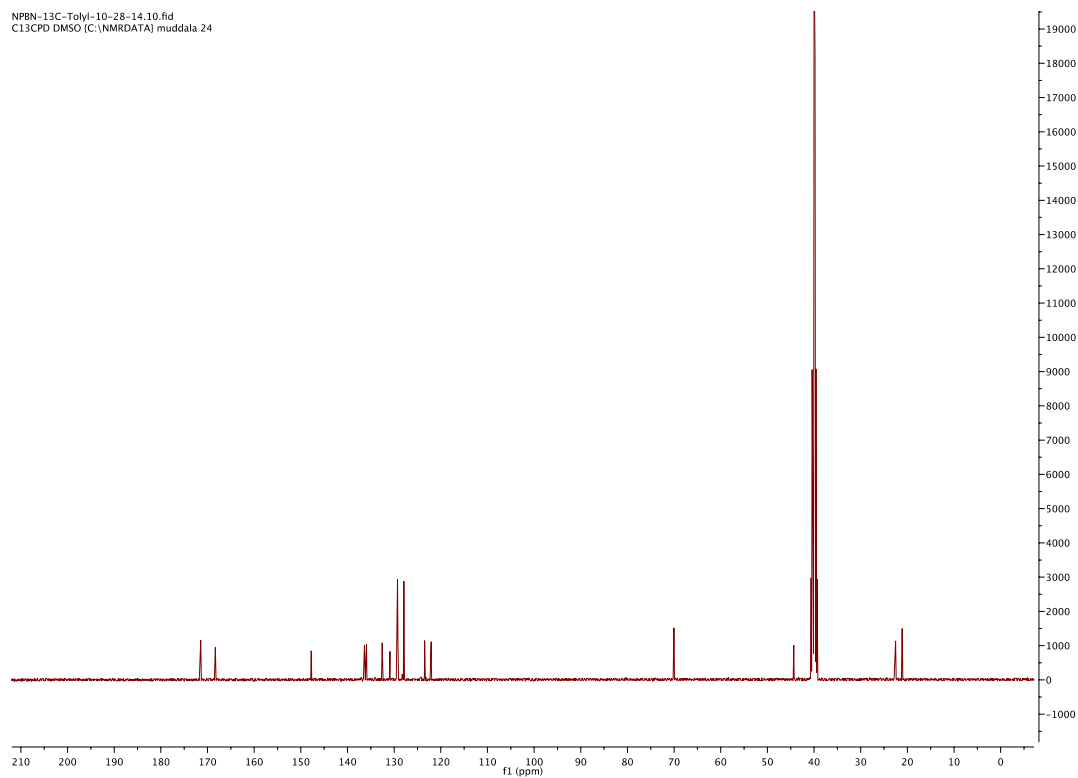

# (±)-2-Cyclohexyl-1-methyl-3-oxoisindoline-1-carboxamide (9I)

NP-1H-Cyclohexyl-10-23-14.10.fid  
PROTON DMSO (C:\NMRDATA) muddala 54

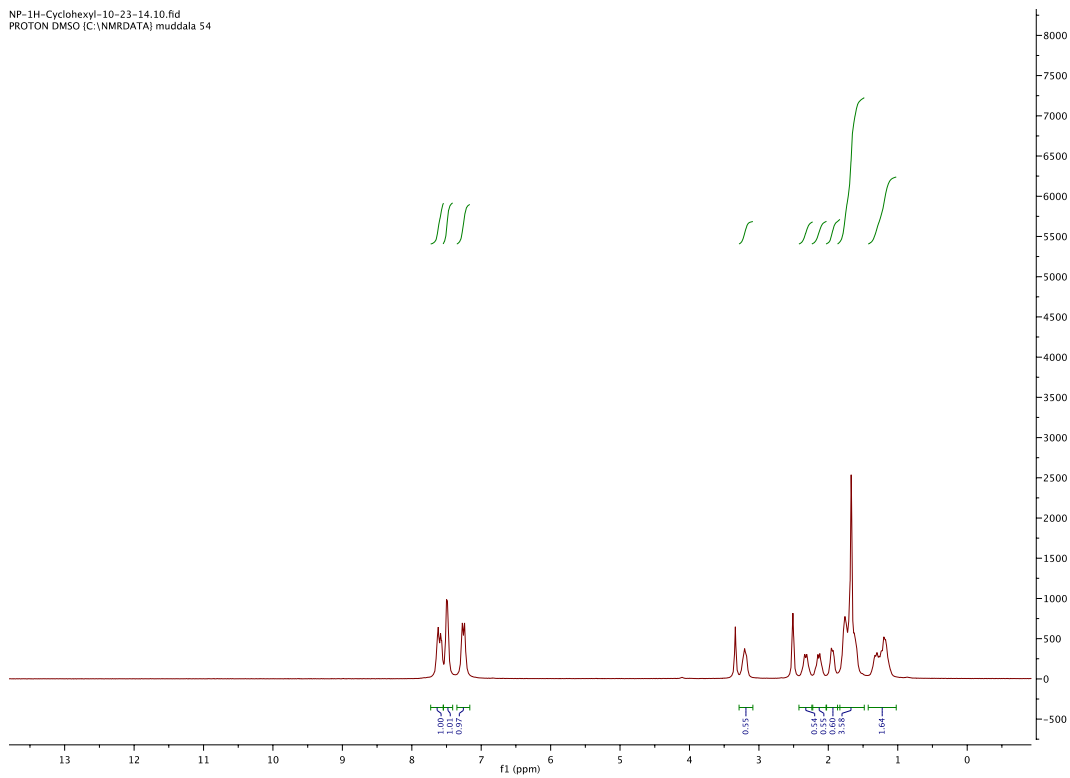

NP-13C-Cyclohexyl-10-23-14.10.fid  
C13CPD DMSO (C:\NMRDATA) muddala 54

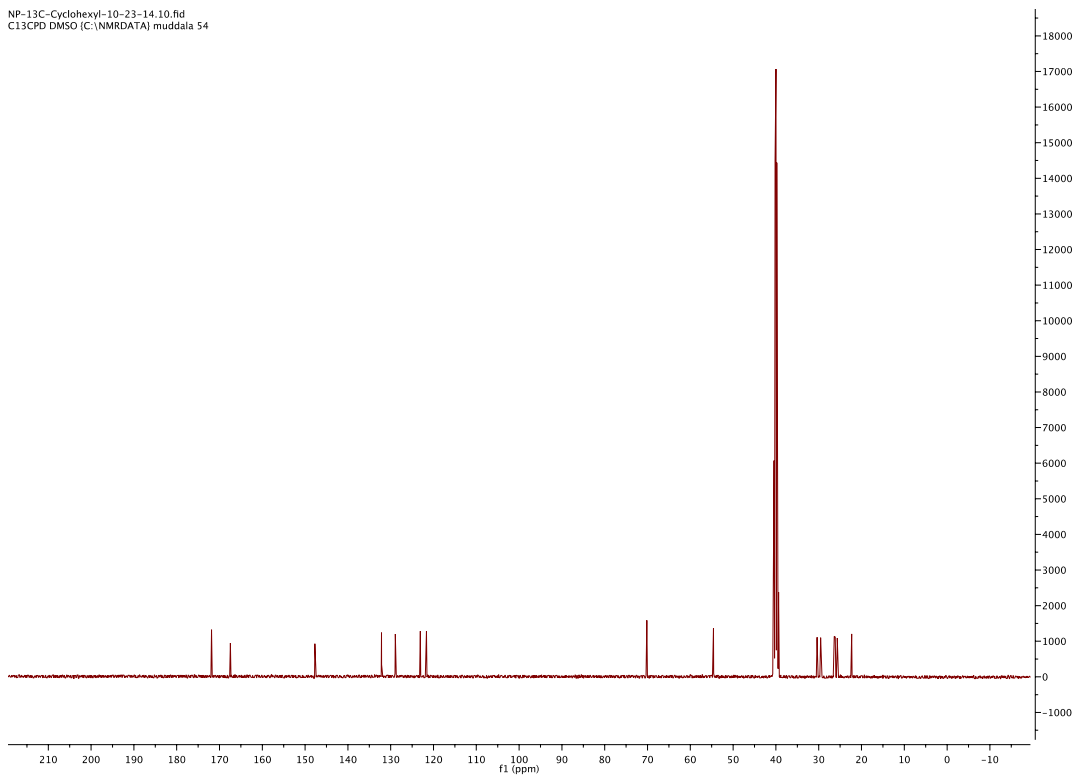

# (±)-2-Hexyl-1-methyl-3-oxoisindoline-1-carboxamide (9m)

NP-1H-NHEXYL-10-23-14.10.fid  
PROTON DMSO [C:\NMRDATA] muddala 52

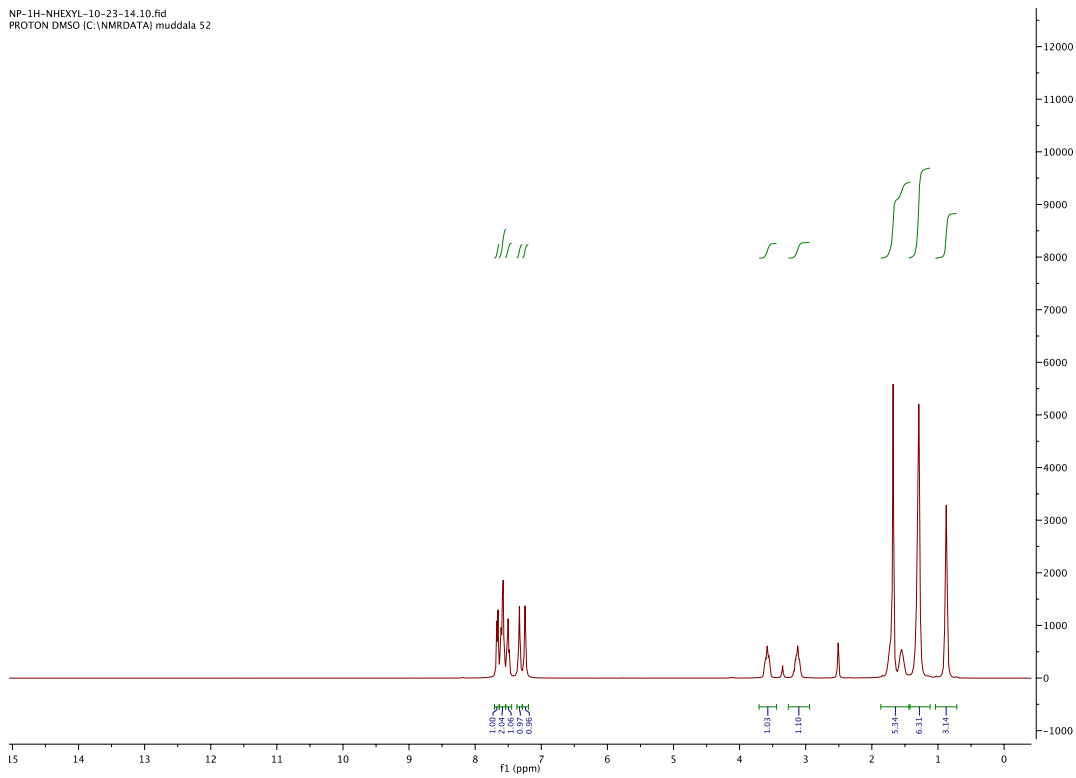

NP-13C-NHEXYL-10-23-14.10.fid  
C13CPD DMSO [C:\NMRDATA] muddala 52

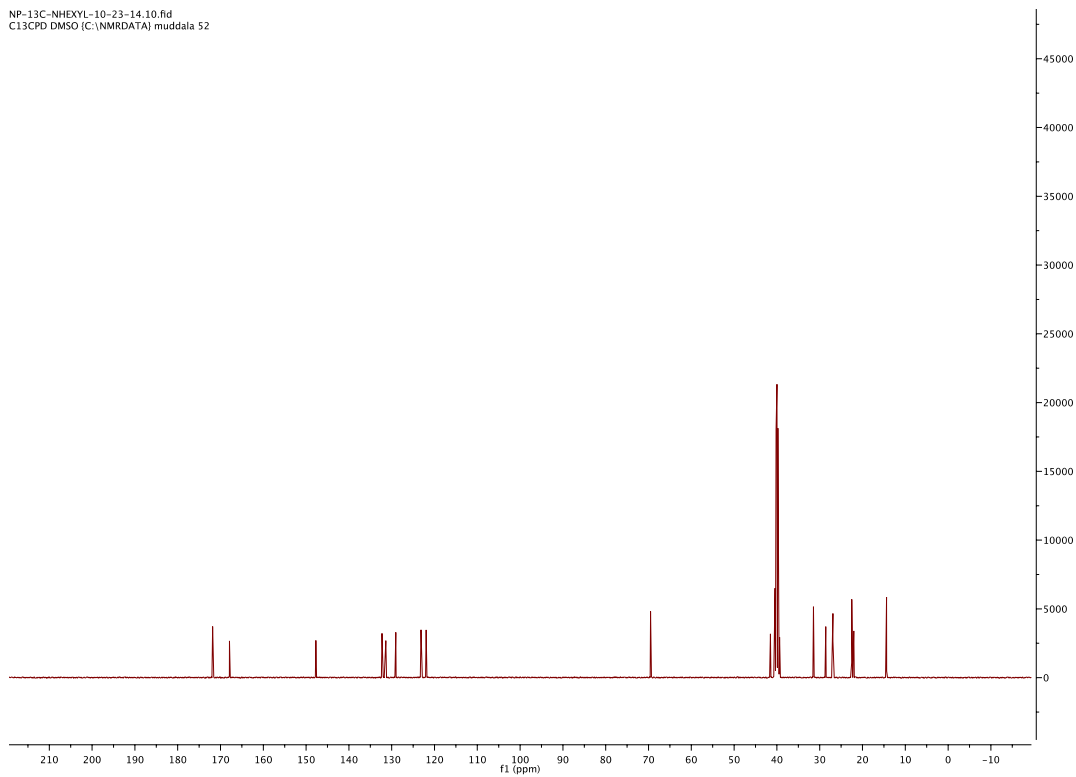

# (±)-2-Isobutyl-1-methyl-3-oxoisindoline-1-carboxamide (9n)

NPN-1H-ISOBUTYL-10-21-14.10.fid  
PROTON DMSO (C:\NMRDATA) muddala 38

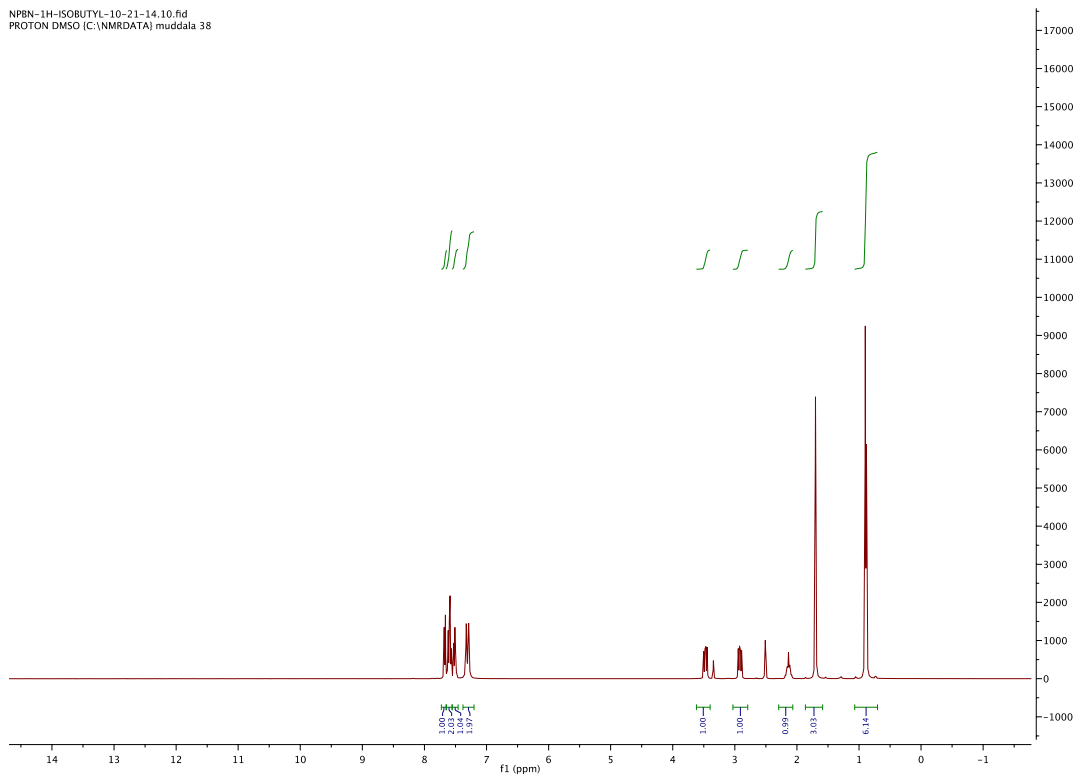

NPN-13C-ISOBUTYL-10-21-14.10.fid  
C13CPD DMSO (C:\NMRDATA) muddala 38

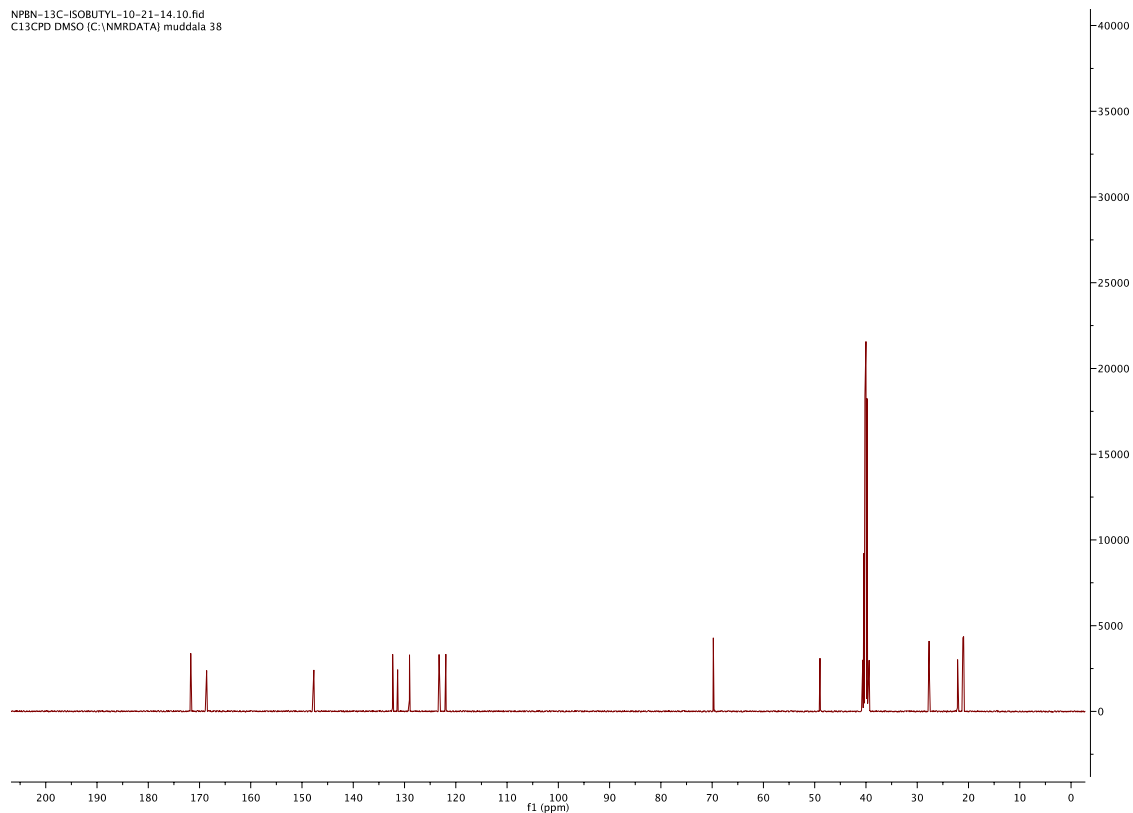

Supplement: c4gc02486a1.pdf [file c4gc02486a1.pdf]
